# Supplementary material for: Aridity synthesis for eight selected key regions of the global climate system during the last 60 000 years
Source: Copernicus journal article supplement (doi:10.5194/cp-16-2221-2020), 2020-11-16
Supplement: Supplementary file 1 [file cp-16-2221-2020-supplement.zip]

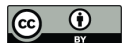

## *Supplement of*

# **Aridity synthesis for eight selected key regions of the global climate system during the last 60 000 years**

**Florian Fuhrmann et al.**

*Correspondence to:* Florian Fuhrmann (ffuhrma@uni-mainz.de)

- cp-16-2221-2020-supplement-title-page.pdf
- Supplement\_aridity\_index\_Paper
  - .DS\_Store
  - Aridity\_index\_Template.xlsx
  - STab\_2.xlsx
  - V3 Aridity Supplement.pdf

The copyright of individual parts of the supplement might differ from the CC BY 4.0 License.
