# Supplementary material for: Aridity synthesis for eight selected key regions of the global climate system during the last 60 000 years
Source: Copernicus journal article supplement (doi:10.5194/cp-16-2221-2020), 2020-11-16
Supplement: Supplementary file 3 [file cp-16-2221-2020-supplement.zip]

Archive with 6 entries (5 files):
- cp-16-2221-2020-supplement-title-page.pdf
- Supplement_aridity_index_Paper/
- Supplement_aridity_index_Paper/.DS_Store
- Supplement_aridity_index_Paper/Aritity_index_Template.xlsx
- Supplement_aridity_index_Paper/STab_2.xlsx
- Supplement_aridity_index_Paper/V3 Aridity Supplement.pdf
