# Supplementary material for: Aridity synthesis for eight selected key regions of the global climate system during the last 60 000 years
Source: Copernicus journal article supplement (doi:10.5194/cp-16-2221-2020), 2020-11-16
Supplement: Supplementary file 3 [file cp-16-2221-2020-supplement.zip › Supplement_aridity_index_Paper/Aritity_index_Template.xlsx]

## Sheet: Index
Aridity Index: 0 = arid; 5 = humid
Factor 1 (1x)	Speleothems: 1 = Speleothem Growth; 0 = no growth
Factor 2 (2x)	Pollen: 2 = lots of trees; 1 = medium; 0 = lots of grass
Factor 3 (2x)	Dust: 2 = no Dust; 1 = medium; 0 = lots of Dust
Age	Index	Speleothem	Pollen	Dust
0	0	FALSE	FALSE	FALSE
50	0	FALSE	FALSE	FALSE
100	0	FALSE	FALSE	FALSE
150	0	FALSE	FALSE	FALSE
200	0	FALSE	FALSE	FALSE
250	0	FALSE	FALSE	FALSE
300	0	FALSE	FALSE	FALSE
350	0	FALSE	FALSE	FALSE
400	0	FALSE	FALSE	FALSE
450	0	FALSE	FALSE	FALSE
500	0	FALSE	FALSE	FALSE
550	0	FALSE	FALSE	FALSE
600	0	FALSE	FALSE	FALSE
650	0	FALSE	FALSE	FALSE
700	0	FALSE	FALSE	FALSE
750	0	FALSE	FALSE	FALSE
800	0	FALSE	FALSE	FALSE
850	0	FALSE	FALSE	FALSE
900	0	FALSE	FALSE	FALSE
950	0	FALSE	FALSE	FALSE
1000	0	FALSE	FALSE	FALSE
1050	0	FALSE	FALSE	FALSE
1100	0	FALSE	FALSE	FALSE
1150	0	FALSE	FALSE	FALSE
1200	0	FALSE	FALSE	FALSE
1250	0	FALSE	FALSE	FALSE
1300	0	FALSE	FALSE	FALSE
1350	0	FALSE	FALSE	FALSE
1400	0	FALSE	FALSE	FALSE
1450	0	FALSE	FALSE	FALSE
1500	0	FALSE	FALSE	FALSE
1550	0	FALSE	FALSE	FALSE
1600	0	FALSE	FALSE	FALSE
1650	0	FALSE	FALSE	FALSE
1700	0	FALSE	FALSE	FALSE
1750	0	FALSE	FALSE	FALSE
1800	0	FALSE	FALSE	FALSE
1850	0	FALSE	FALSE	FALSE
1900	0	FALSE	FALSE	FALSE
1950	0	FALSE	FALSE	FALSE
2000	0	FALSE	FALSE	FALSE
2050	0	FALSE	FALSE	FALSE
2100	0	FALSE	FALSE	FALSE
2150	0	FALSE	FALSE	FALSE
2200	0	FALSE	FALSE	FALSE
2250	0	FALSE	FALSE	FALSE
2300	0	FALSE	FALSE	FALSE
2350	0	FALSE	FALSE	FALSE
2400	0	FALSE	FALSE	FALSE
2450	0	FALSE	FALSE	FALSE
2500	0	FALSE	FALSE	FALSE
2550	0	FALSE	FALSE	FALSE
2600	0	FALSE	FALSE	FALSE
2650	0	FALSE	FALSE	FALSE
2700	0	FALSE	FALSE	FALSE
2750	0	FALSE	FALSE	FALSE
2800	0	FALSE	FALSE	FALSE
2850	0	FALSE	FALSE	FALSE
2900	0	FALSE	FALSE	FALSE
2950	0	FALSE	FALSE	FALSE
3000	0	FALSE	FALSE	FALSE
3050	0	FALSE	FALSE	FALSE
3100	0	FALSE	FALSE	FALSE
3150	0	FALSE	FALSE	FALSE
3200	0	FALSE	FALSE	FALSE
3250	0	FALSE	FALSE	FALSE
3300	0	FALSE	FALSE	FALSE
3350	0	FALSE	FALSE	FALSE
3400	0	FALSE	FALSE	FALSE
3450	0	FALSE	FALSE	FALSE
3500	0	FALSE	FALSE	FALSE
3550	0	FALSE	FALSE	FALSE
3600	0	FALSE	FALSE	FALSE
3650	0	FALSE	FALSE	FALSE
3700	0	FALSE	FALSE	FALSE
3750	0	FALSE	FALSE	FALSE
3800	0	FALSE	FALSE	FALSE
3850	0	FALSE	FALSE	FALSE
3900	0	FALSE	FALSE	FALSE
3950	0	FALSE	FALSE	FALSE
4000	0	FALSE	FALSE	FALSE
4050	0	FALSE	FALSE	FALSE
4100	0	FALSE	FALSE	FALSE
4150	0	FALSE	FALSE	FALSE
4200	0	FALSE	FALSE	FALSE
4250	0	FALSE	FALSE	FALSE
4300	0	FALSE	FALSE	FALSE
4350	0	FALSE	FALSE	FALSE
4400	0	FALSE	FALSE	FALSE
4450	0	FALSE	FALSE	FALSE
4500	0	FALSE	FALSE	FALSE
4550	0	FALSE	FALSE	FALSE
4600	0	FALSE	FALSE	FALSE
4650	0	FALSE	FALSE	FALSE
4700	0	FALSE	FALSE	FALSE
4750	0	FALSE	FALSE	FALSE
4800	0	FALSE	FALSE	FALSE
4850	0	FALSE	FALSE	FALSE
4900	0	FALSE	FALSE	FALSE
4950	0	FALSE	FALSE	FALSE
5000	0	FALSE	FALSE	FALSE
5050	0	FALSE	FALSE	FALSE
5100	0	FALSE	FALSE	FALSE
5150	0	FALSE	FALSE	FALSE
5200	0	FALSE	FALSE	FALSE
5250	0	FALSE	FALSE	FALSE
5300	0	FALSE	FALSE	FALSE
5350	0	FALSE	FALSE	FALSE
5400	0	FALSE	FALSE	FALSE
5450	0	FALSE	FALSE	FALSE
5500	0	FALSE	FALSE	FALSE
5550	0	FALSE	FALSE	FALSE
5600	0	FALSE	FALSE	FALSE
5650	0	FALSE	FALSE	FALSE
5700	0	FALSE	FALSE	FALSE
5750	0	FALSE	FALSE	FALSE
5800	0	FALSE	FALSE	FALSE
5850	0	FALSE	FALSE	FALSE
5900	0	FALSE	FALSE	FALSE
5950	0	FALSE	FALSE	FALSE
6000	0	FALSE	FALSE	FALSE
6050	0	FALSE	FALSE	FALSE
6100	0	FALSE	FALSE	FALSE
6150	0	FALSE	FALSE	FALSE
6200	0	FALSE	FALSE	FALSE
6250	0	FALSE	FALSE	FALSE
6300	0	FALSE	FALSE	FALSE
6350	0	FALSE	FALSE	FALSE
6400	0	FALSE	FALSE	FALSE
6450	0	FALSE	FALSE	FALSE
6500	0	FALSE	FALSE	FALSE
6550	0	FALSE	FALSE	FALSE
6600	0	FALSE	FALSE	FALSE
6650	0	FALSE	FALSE	FALSE
6700	0	FALSE	FALSE	FALSE
6750	0	FALSE	FALSE	FALSE
6800	0	FALSE	FALSE	FALSE
6850	0	FALSE	FALSE	FALSE
6900	0	FALSE	FALSE	FALSE
6950	0	FALSE	FALSE	FALSE
7000	0	FALSE	FALSE	FALSE
7050	0	FALSE	FALSE	FALSE
7100	0	FALSE	FALSE	FALSE
7150	0	FALSE	FALSE	FALSE
7200	0	FALSE	FALSE	FALSE
7250	0	FALSE	FALSE	FALSE
7300	0	FALSE	FALSE	FALSE
7350	0	FALSE	FALSE	FALSE
7400	0	FALSE	FALSE	FALSE
7450	0	FALSE	FALSE	FALSE
7500	0	FALSE	FALSE	FALSE
7550	0	FALSE	FALSE	FALSE
7600	0	FALSE	FALSE	FALSE
7650	0	FALSE	FALSE	FALSE
7700	0	FALSE	FALSE	FALSE
7750	0	FALSE	FALSE	FALSE
7800	0	FALSE	FALSE	FALSE
7850	0	FALSE	FALSE	FALSE
7900	0	FALSE	FALSE	FALSE
7950	0	FALSE	FALSE	FALSE
8000	0	FALSE	FALSE	FALSE
8050	0	FALSE	FALSE	FALSE
8100	0	FALSE	FALSE	FALSE
8150	0	FALSE	FALSE	FALSE
8200	0	FALSE	FALSE	FALSE
8250	0	FALSE	FALSE	FALSE
8300	0	FALSE	FALSE	FALSE
8350	0	FALSE	FALSE	FALSE
8400	0	FALSE	FALSE	FALSE
8450	0	FALSE	FALSE	FALSE
8500	0	FALSE	FALSE	FALSE
8550	0	FALSE	FALSE	FALSE
8600	0	FALSE	FALSE	FALSE
8650	0	FALSE	FALSE	FALSE
8700	0	FALSE	FALSE	FALSE
8750	0	FALSE	FALSE	FALSE
8800	0	FALSE	FALSE	FALSE
8850	0	FALSE	FALSE	FALSE
8900	0	FALSE	FALSE	FALSE
8950	0	FALSE	FALSE	FALSE
9000	0	FALSE	FALSE	FALSE
9050	0	FALSE	FALSE	FALSE
9100	0	FALSE	FALSE	FALSE
9150	0	FALSE	FALSE	FALSE
9200	0	FALSE	FALSE	FALSE
9250	0	FALSE	FALSE	FALSE
9300	0	FALSE	FALSE	FALSE
9350	0	FALSE	FALSE	FALSE
9400	0	FALSE	FALSE	FALSE
9450	0	FALSE	FALSE	FALSE
9500	0	FALSE	FALSE	FALSE
9550	0	FALSE	FALSE	FALSE
9600	0	FALSE	FALSE	FALSE
9650	0	FALSE	FALSE	FALSE
9700	0	FALSE	FALSE	FALSE
9750	0	FALSE	FALSE	FALSE
9800	0	FALSE	FALSE	FALSE
9850	0	FALSE	FALSE	FALSE
9900	0	FALSE	FALSE	FALSE
9950	0	FALSE	FALSE	FALSE
10000	0	FALSE	FALSE	FALSE
10050	0	FALSE	FALSE	FALSE
10100	0	FALSE	FALSE	FALSE
10150	0	FALSE	FALSE	FALSE
10200	0	FALSE	FALSE	FALSE
10250	0	FALSE	FALSE	FALSE
10300	0	FALSE	FALSE	FALSE
10350	0	FALSE	FALSE	FALSE
10400	0	FALSE	FALSE	FALSE
10450	0	FALSE	FALSE	FALSE
10500	0	FALSE	FALSE	FALSE
10550	0	FALSE	FALSE	FALSE
10600	0	FALSE	FALSE	FALSE
10650	0	FALSE	FALSE	FALSE
10700	0	FALSE	FALSE	FALSE
10750	0	FALSE	FALSE	FALSE
10800	0	FALSE	FALSE	FALSE
10850	0	FALSE	FALSE	FALSE
10900	0	FALSE	FALSE	FALSE
10950	0	FALSE	FALSE	FALSE
11000	0	FALSE	FALSE	FALSE
11050	0	FALSE	FALSE	FALSE
11100	0	FALSE	FALSE	FALSE
11150	0	FALSE	FALSE	FALSE
11200	0	FALSE	FALSE	FALSE
11250	0	FALSE	FALSE	FALSE
11300	0	FALSE	FALSE	FALSE
11350	0	FALSE	FALSE	FALSE
11400	0	FALSE	FALSE	FALSE
11450	0	FALSE	FALSE	FALSE
11500	0	FALSE	FALSE	FALSE
11550	0	FALSE	FALSE	FALSE
11600	0	FALSE	FALSE	FALSE
11650	0	FALSE	FALSE	FALSE
11700	0	FALSE	FALSE	FALSE
11750	0	FALSE	FALSE	FALSE
11800	0	FALSE	FALSE	FALSE
11850	0	FALSE	FALSE	FALSE
11900	0	FALSE	FALSE	FALSE
11950	0	FALSE	FALSE	FALSE
12000	0	FALSE	FALSE	FALSE
12050	0	FALSE	FALSE	FALSE
12100	0	FALSE	FALSE	FALSE
12150	0	FALSE	FALSE	FALSE
12200	0	FALSE	FALSE	FALSE
12250	0	FALSE	FALSE	FALSE
12300	0	FALSE	FALSE	FALSE
12350	0	FALSE	FALSE	FALSE
12400	0	FALSE	FALSE	FALSE
12450	0	FALSE	FALSE	FALSE
12500	0	FALSE	FALSE	FALSE
12550	0	FALSE	FALSE	FALSE
12600	0	FALSE	FALSE	FALSE
12650	0	FALSE	FALSE	FALSE
12700	0	FALSE	FALSE	FALSE
12750	0	FALSE	FALSE	FALSE
12800	0	FALSE	FALSE	FALSE
12850	0	FALSE	FALSE	FALSE
12900	0	FALSE	FALSE	FALSE
12950	0	FALSE	FALSE	FALSE
13000	0	FALSE	FALSE	FALSE
13050	0	FALSE	FALSE	FALSE
13100	0	FALSE	FALSE	FALSE
13150	0	FALSE	FALSE	FALSE
13200	0	FALSE	FALSE	FALSE
13250	0	FALSE	FALSE	FALSE
13300	0	FALSE	FALSE	FALSE
13350	0	FALSE	FALSE	FALSE
13400	0	FALSE	FALSE	FALSE
13450	0	FALSE	FALSE	FALSE
13500	0	FALSE	FALSE	FALSE
13550	0	FALSE	FALSE	FALSE
13600	0	FALSE	FALSE	FALSE
13650	0	FALSE	FALSE	FALSE
13700	0	FALSE	FALSE	FALSE
13750	0	FALSE	FALSE	FALSE
13800	0	FALSE	FALSE	FALSE
13850	0	FALSE	FALSE	FALSE
13900	0	FALSE	FALSE	FALSE
13950	0	FALSE	FALSE	FALSE
14000	0	FALSE	FALSE	FALSE
14050	0	FALSE	FALSE	FALSE
14100	0	FALSE	FALSE	FALSE
14150	0	FALSE	FALSE	FALSE
14200	0	FALSE	FALSE	FALSE
14250	0	FALSE	FALSE	FALSE
14300	0	FALSE	FALSE	FALSE
14350	0	FALSE	FALSE	FALSE
14400	0	FALSE	FALSE	FALSE
14450	0	FALSE	FALSE	FALSE
14500	0	FALSE	FALSE	FALSE
14550	0	FALSE	FALSE	FALSE
14600	0	FALSE	FALSE	FALSE
14650	0	FALSE	FALSE	FALSE
14700	0	FALSE	FALSE	FALSE
14750	0	FALSE	FALSE	FALSE
14800	0	FALSE	FALSE	FALSE
14850	0	FALSE	FALSE	FALSE
14900	0	FALSE	FALSE	FALSE
14950	0	FALSE	FALSE	FALSE
15000	0	FALSE	FALSE	FALSE
15050	0	FALSE	FALSE	FALSE
15100	0	FALSE	FALSE	FALSE
15150	0	FALSE	FALSE	FALSE
15200	0	FALSE	FALSE	FALSE
15250	0	FALSE	FALSE	FALSE
15300	0	FALSE	FALSE	FALSE
15350	0	FALSE	FALSE	FALSE
15400	0	FALSE	FALSE	FALSE
15450	0	FALSE	FALSE	FALSE
15500	0	FALSE	FALSE	FALSE
15550	0	FALSE	FALSE	FALSE
15600	0	FALSE	FALSE	FALSE
15650	0	FALSE	FALSE	FALSE
15700	0	FALSE	FALSE	FALSE
15750	0	FALSE	FALSE	FALSE
15800	0	FALSE	FALSE	FALSE
15850	0	FALSE	FALSE	FALSE
15900	0	FALSE	FALSE	FALSE
15950	0	FALSE	FALSE	FALSE
16000	0	FALSE	FALSE	FALSE
16050	0	FALSE	FALSE	FALSE
16100	0	FALSE	FALSE	FALSE
16150	0	FALSE	FALSE	FALSE
16200	0	FALSE	FALSE	FALSE
16250	0	FALSE	FALSE	FALSE
16300	0	FALSE	FALSE	FALSE
16350	0	FALSE	FALSE	FALSE
16400	0	FALSE	FALSE	FALSE
16450	0	FALSE	FALSE	FALSE
16500	0	FALSE	FALSE	FALSE
16550	0	FALSE	FALSE	FALSE
16600	0	FALSE	FALSE	FALSE
16650	0	FALSE	FALSE	FALSE
16700	0	FALSE	FALSE	FALSE
16750	0	FALSE	FALSE	FALSE
16800	0	FALSE	FALSE	FALSE
16850	0	FALSE	FALSE	FALSE
16900	0	FALSE	FALSE	FALSE
16950	0	FALSE	FALSE	FALSE
17000	0	FALSE	FALSE	FALSE
17050	0	FALSE	FALSE	FALSE
17100	0	FALSE	FALSE	FALSE
17150	0	FALSE	FALSE	FALSE
17200	0	FALSE	FALSE	FALSE
17250	0	FALSE	FALSE	FALSE
17300	0	FALSE	FALSE	FALSE
17350	0	FALSE	FALSE	FALSE
17400	0	FALSE	FALSE	FALSE
17450	0	FALSE	FALSE	FALSE
17500	0	FALSE	FALSE	FALSE
17550	0	FALSE	FALSE	FALSE
17600	0	FALSE	FALSE	FALSE
17650	0	FALSE	FALSE	FALSE
17700	0	FALSE	FALSE	FALSE
17750	0	FALSE	FALSE	FALSE
17800	0	FALSE	FALSE	FALSE
17850	0	FALSE	FALSE	FALSE
17900	0	FALSE	FALSE	FALSE
17950	0	FALSE	FALSE	FALSE
18000	0	FALSE	FALSE	FALSE
18050	0	FALSE	FALSE	FALSE
18100	0	FALSE	FALSE	FALSE
18150	0	FALSE	FALSE	FALSE
18200	0	FALSE	FALSE	FALSE
18250	0	FALSE	FALSE	FALSE
18300	0	FALSE	FALSE	FALSE
18350	0	FALSE	FALSE	FALSE
18400	0	FALSE	FALSE	FALSE
18450	0	FALSE	FALSE	FALSE
18500	0	FALSE	FALSE	FALSE
18550	0	FALSE	FALSE	FALSE
18600	0	FALSE	FALSE	FALSE
18650	0	FALSE	FALSE	FALSE
18700	0	FALSE	FALSE	FALSE
18750	0	FALSE	FALSE	FALSE
18800	0	FALSE	FALSE	FALSE
18850	0	FALSE	FALSE	FALSE
18900	0	FALSE	FALSE	FALSE
18950	0	FALSE	FALSE	FALSE
19000	0	FALSE	FALSE	FALSE
19050	0	FALSE	FALSE	FALSE
19100	0	FALSE	FALSE	FALSE
19150	0	FALSE	FALSE	FALSE
19200	0	FALSE	FALSE	FALSE
19250	0	FALSE	FALSE	FALSE
19300	0	FALSE	FALSE	FALSE
19350	0	FALSE	FALSE	FALSE
19400	0	FALSE	FALSE	FALSE
19450	0	FALSE	FALSE	FALSE
19500	0	FALSE	FALSE	FALSE
19550	0	FALSE	FALSE	FALSE
19600	0	FALSE	FALSE	FALSE
19650	0	FALSE	FALSE	FALSE
19700	0	FALSE	FALSE	FALSE
19750	0	FALSE	FALSE	FALSE
19800	0	FALSE	FALSE	FALSE
19850	0	FALSE	FALSE	FALSE
19900	0	FALSE	FALSE	FALSE
19950	0	FALSE	FALSE	FALSE
20000	0	FALSE	FALSE	FALSE
20050	0	FALSE	FALSE	FALSE
20100	0	FALSE	FALSE	FALSE
20150	0	FALSE	FALSE	FALSE
20200	0	FALSE	FALSE	FALSE
20250	0	FALSE	FALSE	FALSE
20300	0	FALSE	FALSE	FALSE
20350	0	FALSE	FALSE	FALSE
20400	0	FALSE	FALSE	FALSE
20450	0	FALSE	FALSE	FALSE
20500	0	FALSE	FALSE	FALSE
20550	0	FALSE	FALSE	FALSE
20600	0	FALSE	FALSE	FALSE
20650	0	FALSE	FALSE	FALSE
20700	0	FALSE	FALSE	FALSE
20750	0	FALSE	FALSE	FALSE
20800	0	FALSE	FALSE	FALSE
20850	0	FALSE	FALSE	FALSE
20900	0	FALSE	FALSE	FALSE
20950	0	FALSE	FALSE	FALSE
21000	0	FALSE	FALSE	FALSE
21050	0	FALSE	FALSE	FALSE
21100	0	FALSE	FALSE	FALSE
21150	0	FALSE	FALSE	FALSE
21200	0	FALSE	FALSE	FALSE
21250	0	FALSE	FALSE	FALSE
21300	0	FALSE	FALSE	FALSE
21350	0	FALSE	FALSE	FALSE
21400	0	FALSE	FALSE	FALSE
21450	0	FALSE	FALSE	FALSE
21500	0	FALSE	FALSE	FALSE
21550	0	FALSE	FALSE	FALSE
21600	0	FALSE	FALSE	FALSE
21650	0	FALSE	FALSE	FALSE
21700	0	FALSE	FALSE	FALSE
21750	0	FALSE	FALSE	FALSE
21800	0	FALSE	FALSE	FALSE
21850	0	FALSE	FALSE	FALSE
21900	0	FALSE	FALSE	FALSE
21950	0	FALSE	FALSE	FALSE
22000	0	FALSE	FALSE	FALSE
22050	0	FALSE	FALSE	FALSE
22100	0	FALSE	FALSE	FALSE
22150	0	FALSE	FALSE	FALSE
22200	0	FALSE	FALSE	FALSE
22250	0	FALSE	FALSE	FALSE
22300	0	FALSE	FALSE	FALSE
22350	0	FALSE	FALSE	FALSE
22400	0	FALSE	FALSE	FALSE
22450	0	FALSE	FALSE	FALSE
22500	0	FALSE	FALSE	FALSE
22550	0	FALSE	FALSE	FALSE
22600	0	FALSE	FALSE	FALSE
22650	0	FALSE	FALSE	FALSE
22700	0	FALSE	FALSE	FALSE
22750	0	FALSE	FALSE	FALSE
22800	0	FALSE	FALSE	FALSE
22850	0	FALSE	FALSE	FALSE
22900	0	FALSE	FALSE	FALSE
22950	0	FALSE	FALSE	FALSE
23000	0	FALSE	FALSE	FALSE
23050	0	FALSE	FALSE	FALSE
23100	0	FALSE	FALSE	FALSE
23150	0	FALSE	FALSE	FALSE
23200	0	FALSE	FALSE	FALSE
23250	0	FALSE	FALSE	FALSE
23300	0	FALSE	FALSE	FALSE
23350	0	FALSE	FALSE	FALSE
23400	0	FALSE	FALSE	FALSE
23450	0	FALSE	FALSE	FALSE
23500	0	FALSE	FALSE	FALSE
23550	0	FALSE	FALSE	FALSE
23600	0	FALSE	FALSE	FALSE
23650	0	FALSE	FALSE	FALSE
23700	0	FALSE	FALSE	FALSE
23750	0	FALSE	FALSE	FALSE
23800	0	FALSE	FALSE	FALSE
23850	0	FALSE	FALSE	FALSE
23900	0	FALSE	FALSE	FALSE
23950	0	FALSE	FALSE	FALSE
24000	0	FALSE	FALSE	FALSE
24050	0	FALSE	FALSE	FALSE
24100	0	FALSE	FALSE	FALSE
24150	0	FALSE	FALSE	FALSE
24200	0	FALSE	FALSE	FALSE
24250	0	FALSE	FALSE	FALSE
24300	0	FALSE	FALSE	FALSE
24350	0	FALSE	FALSE	FALSE
24400	0	FALSE	FALSE	FALSE
24450	0	FALSE	FALSE	FALSE
24500	0	FALSE	FALSE	FALSE
24550	0	FALSE	FALSE	FALSE
24600	0	FALSE	FALSE	FALSE
24650	0	FALSE	FALSE	FALSE
24700	0	FALSE	FALSE	FALSE
24750	0	FALSE	FALSE	FALSE
24800	0	FALSE	FALSE	FALSE
24850	0	FALSE	FALSE	FALSE
24900	0	FALSE	FALSE	FALSE
24950	0	FALSE	FALSE	FALSE
25000	0	FALSE	FALSE	FALSE
25050	0	FALSE	FALSE	FALSE
25100	0	FALSE	FALSE	FALSE
25150	0	FALSE	FALSE	FALSE
25200	0	FALSE	FALSE	FALSE
25250	0	FALSE	FALSE	FALSE
25300	0	FALSE	FALSE	FALSE
25350	0	FALSE	FALSE	FALSE
25400	0	FALSE	FALSE	FALSE
25450	0	FALSE	FALSE	FALSE
25500	0	FALSE	FALSE	FALSE
25550	0	FALSE	FALSE	FALSE
25600	0	FALSE	FALSE	FALSE
25650	0	FALSE	FALSE	FALSE
25700	0	FALSE	FALSE	FALSE
25750	0	FALSE	FALSE	FALSE
25800	0	FALSE	FALSE	FALSE
25850	0	FALSE	FALSE	FALSE
25900	0	FALSE	FALSE	FALSE
25950	0	FALSE	FALSE	FALSE
26000	0	FALSE	FALSE	FALSE
26050	0	FALSE	FALSE	FALSE
26100	0	FALSE	FALSE	FALSE
26150	0	FALSE	FALSE	FALSE
26200	0	FALSE	FALSE	FALSE
26250	0	FALSE	FALSE	FALSE
26300	0	FALSE	FALSE	FALSE
26350	0	FALSE	FALSE	FALSE
26400	0	FALSE	FALSE	FALSE
26450	0	FALSE	FALSE	FALSE
26500	0	FALSE	FALSE	FALSE
26550	0	FALSE	FALSE	FALSE
26600	0	FALSE	FALSE	FALSE
26650	0	FALSE	FALSE	FALSE
26700	0	FALSE	FALSE	FALSE
26750	0	FALSE	FALSE	FALSE
26800	0	FALSE	FALSE	FALSE
26850	0	FALSE	FALSE	FALSE
26900	0	FALSE	FALSE	FALSE
26950	0	FALSE	FALSE	FALSE
27000	0	FALSE	FALSE	FALSE
27050	0	FALSE	FALSE	FALSE
27100	0	FALSE	FALSE	FALSE
27150	0	FALSE	FALSE	FALSE
27200	0	FALSE	FALSE	FALSE
27250	0	FALSE	FALSE	FALSE
27300	0	FALSE	FALSE	FALSE
27350	0	FALSE	FALSE	FALSE
27400	0	FALSE	FALSE	FALSE
27450	0	FALSE	FALSE	FALSE
27500	0	FALSE	FALSE	FALSE
27550	0	FALSE	FALSE	FALSE
27600	0	FALSE	FALSE	FALSE
27650	0	FALSE	FALSE	FALSE
27700	0	FALSE	FALSE	FALSE
27750	0	FALSE	FALSE	FALSE
27800	0	FALSE	FALSE	FALSE
27850	0	FALSE	FALSE	FALSE
27900	0	FALSE	FALSE	FALSE
27950	0	FALSE	FALSE	FALSE
28000	0	FALSE	FALSE	FALSE
28050	0	FALSE	FALSE	FALSE
28100	0	FALSE	FALSE	FALSE
28150	0	FALSE	FALSE	FALSE
28200	0	FALSE	FALSE	FALSE
28250	0	FALSE	FALSE	FALSE
28300	0	FALSE	FALSE	FALSE
28350	0	FALSE	FALSE	FALSE
28400	0	FALSE	FALSE	FALSE
28450	0	FALSE	FALSE	FALSE
28500	0	FALSE	FALSE	FALSE
28550	0	FALSE	FALSE	FALSE
28600	0	FALSE	FALSE	FALSE
28650	0	FALSE	FALSE	FALSE
28700	0	FALSE	FALSE	FALSE
28750	0	FALSE	FALSE	FALSE
28800	0	FALSE	FALSE	FALSE
28850	0	FALSE	FALSE	FALSE
28900	0	FALSE	FALSE	FALSE
28950	0	FALSE	FALSE	FALSE
29000	0	FALSE	FALSE	FALSE
29050	0	FALSE	FALSE	FALSE
29100	0	FALSE	FALSE	FALSE
29150	0	FALSE	FALSE	FALSE
29200	0	FALSE	FALSE	FALSE
29250	0	FALSE	FALSE	FALSE
29300	0	FALSE	FALSE	FALSE
29350	0	FALSE	FALSE	FALSE
29400	0	FALSE	FALSE	FALSE
29450	0	FALSE	FALSE	FALSE
29500	0	FALSE	FALSE	FALSE
29550	0	FALSE	FALSE	FALSE
29600	0	FALSE	FALSE	FALSE
29650	0	FALSE	FALSE	FALSE
29700	0	FALSE	FALSE	FALSE
29750	0	FALSE	FALSE	FALSE
29800	0	FALSE	FALSE	FALSE
29850	0	FALSE	FALSE	FALSE
29900	0	FALSE	FALSE	FALSE
29950	0	FALSE	FALSE	FALSE
30000	0	FALSE	FALSE	FALSE
30050	0	FALSE	FALSE	FALSE
30100	0	FALSE	FALSE	FALSE
30150	0	FALSE	FALSE	FALSE
30200	0	FALSE	FALSE	FALSE
30250	0	FALSE	FALSE	FALSE
30300	0	FALSE	FALSE	FALSE
30350	0	FALSE	FALSE	FALSE
30400	0	FALSE	FALSE	FALSE
30450	0	FALSE	FALSE	FALSE
30500	0	FALSE	FALSE	FALSE
30550	0	FALSE	FALSE	FALSE
30600	0	FALSE	FALSE	FALSE
30650	0	FALSE	FALSE	FALSE
30700	0	FALSE	FALSE	FALSE
30750	0	FALSE	FALSE	FALSE
30800	0	FALSE	FALSE	FALSE
30850	0	FALSE	FALSE	FALSE
30900	0	FALSE	FALSE	FALSE
30950	0	FALSE	FALSE	FALSE
31000	0	FALSE	FALSE	FALSE
31050	0	FALSE	FALSE	FALSE
31100	0	FALSE	FALSE	FALSE
31150	0	FALSE	FALSE	FALSE
31200	0	FALSE	FALSE	FALSE
31250	0	FALSE	FALSE	FALSE
31300	0	FALSE	FALSE	FALSE
31350	0	FALSE	FALSE	FALSE
31400	0	FALSE	FALSE	FALSE
31450	0	FALSE	FALSE	FALSE
31500	0	FALSE	FALSE	FALSE
31550	0	FALSE	FALSE	FALSE
31600	0	FALSE	FALSE	FALSE
31650	0	FALSE	FALSE	FALSE
31700	0	FALSE	FALSE	FALSE
31750	0	FALSE	FALSE	FALSE
31800	0	FALSE	FALSE	FALSE
31850	0	FALSE	FALSE	FALSE
31900	0	FALSE	FALSE	FALSE
31950	0	FALSE	FALSE	FALSE
32000	0	FALSE	FALSE	FALSE
32050	0	FALSE	FALSE	FALSE
32100	0	FALSE	FALSE	FALSE
32150	0	FALSE	FALSE	FALSE
32200	0	FALSE	FALSE	FALSE
32250	0	FALSE	FALSE	FALSE
32300	0	FALSE	FALSE	FALSE
32350	0	FALSE	FALSE	FALSE
32400	0	FALSE	FALSE	FALSE
32450	0	FALSE	FALSE	FALSE
32500	0	FALSE	FALSE	FALSE
32550	0	FALSE	FALSE	FALSE
32600	0	FALSE	FALSE	FALSE
32650	0	FALSE	FALSE	FALSE
32700	0	FALSE	FALSE	FALSE
32750	0	FALSE	FALSE	FALSE
32800	0	FALSE	FALSE	FALSE
32850	0	FALSE	FALSE	FALSE
32900	0	FALSE	FALSE	FALSE
32950	0	FALSE	FALSE	FALSE
33000	0	FALSE	FALSE	FALSE
33050	0	FALSE	FALSE	FALSE
33100	0	FALSE	FALSE	FALSE
33150	0	FALSE	FALSE	FALSE
33200	0	FALSE	FALSE	FALSE
33250	0	FALSE	FALSE	FALSE
33300	0	FALSE	FALSE	FALSE
33350	0	FALSE	FALSE	FALSE
33400	0	FALSE	FALSE	FALSE
33450	0	FALSE	FALSE	FALSE
33500	0	FALSE	FALSE	FALSE
33550	0	FALSE	FALSE	FALSE
33600	0	FALSE	FALSE	FALSE
33650	0	FALSE	FALSE	FALSE
33700	0	FALSE	FALSE	FALSE
33750	0	FALSE	FALSE	FALSE
33800	0	FALSE	FALSE	FALSE
33850	0	FALSE	FALSE	FALSE
33900	0	FALSE	FALSE	FALSE
33950	0	FALSE	FALSE	FALSE
34000	0	FALSE	FALSE	FALSE
34050	0	FALSE	FALSE	FALSE
34100	0	FALSE	FALSE	FALSE
34150	0	FALSE	FALSE	FALSE
34200	0	FALSE	FALSE	FALSE
34250	0	FALSE	FALSE	FALSE
34300	0	FALSE	FALSE	FALSE
34350	0	FALSE	FALSE	FALSE
34400	0	FALSE	FALSE	FALSE
34450	0	FALSE	FALSE	FALSE
34500	0	FALSE	FALSE	FALSE
34550	0	FALSE	FALSE	FALSE
34600	0	FALSE	FALSE	FALSE
34650	0	FALSE	FALSE	FALSE
34700	0	FALSE	FALSE	FALSE
34750	0	FALSE	FALSE	FALSE
34800	0	FALSE	FALSE	FALSE
34850	0	FALSE	FALSE	FALSE
34900	0	FALSE	FALSE	FALSE
34950	0	FALSE	FALSE	FALSE
35000	0	FALSE	FALSE	FALSE
35050	0	FALSE	FALSE	FALSE
35100	0	FALSE	FALSE	FALSE
35150	0	FALSE	FALSE	FALSE
35200	0	FALSE	FALSE	FALSE
35250	0	FALSE	FALSE	FALSE
35300	0	FALSE	FALSE	FALSE
35350	0	FALSE	FALSE	FALSE
35400	0	FALSE	FALSE	FALSE
35450	0	FALSE	FALSE	FALSE
35500	0	FALSE	FALSE	FALSE
35550	0	FALSE	FALSE	FALSE
35600	0	FALSE	FALSE	FALSE
35650	0	FALSE	FALSE	FALSE
35700	0	FALSE	FALSE	FALSE
35750	0	FALSE	FALSE	FALSE
35800	0	FALSE	FALSE	FALSE
35850	0	FALSE	FALSE	FALSE
35900	0	FALSE	FALSE	FALSE
35950	0	FALSE	FALSE	FALSE
36000	0	FALSE	FALSE	FALSE
36050	0	FALSE	FALSE	FALSE
36100	0	FALSE	FALSE	FALSE
36150	0	FALSE	FALSE	FALSE
36200	0	FALSE	FALSE	FALSE
36250	0	FALSE	FALSE	FALSE
36300	0	FALSE	FALSE	FALSE
36350	0	FALSE	FALSE	FALSE
36400	0	FALSE	FALSE	FALSE
36450	0	FALSE	FALSE	FALSE
36500	0	FALSE	FALSE	FALSE
36550	0	FALSE	FALSE	FALSE
36600	0	FALSE	FALSE	FALSE
36650	0	FALSE	FALSE	FALSE
36700	0	FALSE	FALSE	FALSE
36750	0	FALSE	FALSE	FALSE
36800	0	FALSE	FALSE	FALSE
36850	0	FALSE	FALSE	FALSE
36900	0	FALSE	FALSE	FALSE
36950	0	FALSE	FALSE	FALSE
37000	0	FALSE	FALSE	FALSE
37050	0	FALSE	FALSE	FALSE
37100	0	FALSE	FALSE	FALSE
37150	0	FALSE	FALSE	FALSE
37200	0	FALSE	FALSE	FALSE
37250	0	FALSE	FALSE	FALSE
37300	0	FALSE	FALSE	FALSE
37350	0	FALSE	FALSE	FALSE
37400	0	FALSE	FALSE	FALSE
37450	0	FALSE	FALSE	FALSE
37500	0	FALSE	FALSE	FALSE
37550	0	FALSE	FALSE	FALSE
37600	0	FALSE	FALSE	FALSE
37650	0	FALSE	FALSE	FALSE
37700	0	FALSE	FALSE	FALSE
37750	0	FALSE	FALSE	FALSE
37800	0	FALSE	FALSE	FALSE
37850	0	FALSE	FALSE	FALSE
37900	0	FALSE	FALSE	FALSE
37950	0	FALSE	FALSE	FALSE
38000	0	FALSE	FALSE	FALSE
38050	0	FALSE	FALSE	FALSE
38100	0	FALSE	FALSE	FALSE
38150	0	FALSE	FALSE	FALSE
38200	0	FALSE	FALSE	FALSE
38250	0	FALSE	FALSE	FALSE
38300	0	FALSE	FALSE	FALSE
38350	0	FALSE	FALSE	FALSE
38400	0	FALSE	FALSE	FALSE
38450	0	FALSE	FALSE	FALSE
38500	0	FALSE	FALSE	FALSE
38550	0	FALSE	FALSE	FALSE
38600	0	FALSE	FALSE	FALSE
38650	0	FALSE	FALSE	FALSE
38700	0	FALSE	FALSE	FALSE
38750	0	FALSE	FALSE	FALSE
38800	0	FALSE	FALSE	FALSE
38850	0	FALSE	FALSE	FALSE
38900	0	FALSE	FALSE	FALSE
38950	0	FALSE	FALSE	FALSE
39000	0	FALSE	FALSE	FALSE
39050	0	FALSE	FALSE	FALSE
39100	0	FALSE	FALSE	FALSE
39150	0	FALSE	FALSE	FALSE
39200	0	FALSE	FALSE	FALSE
39250	0	FALSE	FALSE	FALSE
39300	0	FALSE	FALSE	FALSE
39350	0	FALSE	FALSE	FALSE
39400	0	FALSE	FALSE	FALSE
39450	0	FALSE	FALSE	FALSE
39500	0	FALSE	FALSE	FALSE
39550	0	FALSE	FALSE	FALSE
39600	0	FALSE	FALSE	FALSE
39650	0	FALSE	FALSE	FALSE
39700	0	FALSE	FALSE	FALSE
39750	0	FALSE	FALSE	FALSE
39800	0	FALSE	FALSE	FALSE
39850	0	FALSE	FALSE	FALSE
39900	0	FALSE	FALSE	FALSE
39950	0	FALSE	FALSE	FALSE
40000	0	FALSE	FALSE	FALSE
40050	0	FALSE	FALSE	FALSE
40100	0	FALSE	FALSE	FALSE
40150	0	FALSE	FALSE	FALSE
40200	0	FALSE	FALSE	FALSE
40250	0	FALSE	FALSE	FALSE
40300	0	FALSE	FALSE	FALSE
40350	0	FALSE	FALSE	FALSE
40400	0	FALSE	FALSE	FALSE
40450	0	FALSE	FALSE	FALSE
40500	0	FALSE	FALSE	FALSE
40550	0	FALSE	FALSE	FALSE
40600	0	FALSE	FALSE	FALSE
40650	0	FALSE	FALSE	FALSE
40700	0	FALSE	FALSE	FALSE
40750	0	FALSE	FALSE	FALSE
40800	0	FALSE	FALSE	FALSE
40850	0	FALSE	FALSE	FALSE
40900	0	FALSE	FALSE	FALSE
40950	0	FALSE	FALSE	FALSE
41000	0	FALSE	FALSE	FALSE
41050	0	FALSE	FALSE	FALSE
41100	0	FALSE	FALSE	FALSE
41150	0	FALSE	FALSE	FALSE
41200	0	FALSE	FALSE	FALSE
41250	0	FALSE	FALSE	FALSE
41300	0	FALSE	FALSE	FALSE
41350	0	FALSE	FALSE	FALSE
41400	0	FALSE	FALSE	FALSE
41450	0	FALSE	FALSE	FALSE
41500	0	FALSE	FALSE	FALSE
41550	0	FALSE	FALSE	FALSE
41600	0	FALSE	FALSE	FALSE
41650	0	FALSE	FALSE	FALSE
41700	0	FALSE	FALSE	FALSE
41750	0	FALSE	FALSE	FALSE
41800	0	FALSE	FALSE	FALSE
41850	0	FALSE	FALSE	FALSE
41900	0	FALSE	FALSE	FALSE
41950	0	FALSE	FALSE	FALSE
42000	0	FALSE	FALSE	FALSE
42050	0	FALSE	FALSE	FALSE
42100	0	FALSE	FALSE	FALSE
42150	0	FALSE	FALSE	FALSE
42200	0	FALSE	FALSE	FALSE
42250	0	FALSE	FALSE	FALSE
42300	0	FALSE	FALSE	FALSE
42350	0	FALSE	FALSE	FALSE
42400	0	FALSE	FALSE	FALSE
42450	0	FALSE	FALSE	FALSE
42500	0	FALSE	FALSE	FALSE
42550	0	FALSE	FALSE	FALSE
42600	0	FALSE	FALSE	FALSE
42650	0	FALSE	FALSE	FALSE
42700	0	FALSE	FALSE	FALSE
42750	0	FALSE	FALSE	FALSE
42800	0	FALSE	FALSE	FALSE
42850	0	FALSE	FALSE	FALSE
42900	0	FALSE	FALSE	FALSE
42950	0	FALSE	FALSE	FALSE
43000	0	FALSE	FALSE	FALSE
43050	0	FALSE	FALSE	FALSE
43100	0	FALSE	FALSE	FALSE
43150	0	FALSE	FALSE	FALSE
43200	0	FALSE	FALSE	FALSE
43250	0	FALSE	FALSE	FALSE
43300	0	FALSE	FALSE	FALSE
43350	0	FALSE	FALSE	FALSE
43400	0	FALSE	FALSE	FALSE
43450	0	FALSE	FALSE	FALSE
43500	0	FALSE	FALSE	FALSE
43550	0	FALSE	FALSE	FALSE
43600	0	FALSE	FALSE	FALSE
43650	0	FALSE	FALSE	FALSE
43700	0	FALSE	FALSE	FALSE
43750	0	FALSE	FALSE	FALSE
43800	0	FALSE	FALSE	FALSE
43850	0	FALSE	FALSE	FALSE
43900	0	FALSE	FALSE	FALSE
43950	0	FALSE	FALSE	FALSE
44000	0	FALSE	FALSE	FALSE
44050	0	FALSE	FALSE	FALSE
44100	0	FALSE	FALSE	FALSE
44150	0	FALSE	FALSE	FALSE
44200	0	FALSE	FALSE	FALSE
44250	0	FALSE	FALSE	FALSE
44300	0	FALSE	FALSE	FALSE
44350	0	FALSE	FALSE	FALSE
44400	0	FALSE	FALSE	FALSE
44450	0	FALSE	FALSE	FALSE
44500	0	FALSE	FALSE	FALSE
44550	0	FALSE	FALSE	FALSE
44600	0	FALSE	FALSE	FALSE
44650	0	FALSE	FALSE	FALSE
44700	0	FALSE	FALSE	FALSE
44750	0	FALSE	FALSE	FALSE
44800	0	FALSE	FALSE	FALSE
44850	0	FALSE	FALSE	FALSE
44900	0	FALSE	FALSE	FALSE
44950	0	FALSE	FALSE	FALSE
45000	0	FALSE	FALSE	FALSE
45050	0	FALSE	FALSE	FALSE
45100	0	FALSE	FALSE	FALSE
45150	0	FALSE	FALSE	FALSE
45200	0	FALSE	FALSE	FALSE
45250	0	FALSE	FALSE	FALSE
45300	0	FALSE	FALSE	FALSE
45350	0	FALSE	FALSE	FALSE
45400	0	FALSE	FALSE	FALSE
45450	0	FALSE	FALSE	FALSE
45500	0	FALSE	FALSE	FALSE
45550	0	FALSE	FALSE	FALSE
45600	0	FALSE	FALSE	FALSE
45650	0	FALSE	FALSE	FALSE
45700	0	FALSE	FALSE	FALSE
45750	0	FALSE	FALSE	FALSE
45800	0	FALSE	FALSE	FALSE
45850	0	FALSE	FALSE	FALSE
45900	0	FALSE	FALSE	FALSE
45950	0	FALSE	FALSE	FALSE
46000	0	FALSE	FALSE	FALSE
46050	0	FALSE	FALSE	FALSE
46100	0	FALSE	FALSE	FALSE
46150	0	FALSE	FALSE	FALSE
46200	0	FALSE	FALSE	FALSE
46250	0	FALSE	FALSE	FALSE
46300	0	FALSE	FALSE	FALSE
46350	0	FALSE	FALSE	FALSE
46400	0	FALSE	FALSE	FALSE
46450	0	FALSE	FALSE	FALSE
46500	0	FALSE	FALSE	FALSE
46550	0	FALSE	FALSE	FALSE
46600	0	FALSE	FALSE	FALSE
46650	0	FALSE	FALSE	FALSE
46700	0	FALSE	FALSE	FALSE
46750	0	FALSE	FALSE	FALSE
46800	0	FALSE	FALSE	FALSE
46850	0	FALSE	FALSE	FALSE
46900	0	FALSE	FALSE	FALSE
46950	0	FALSE	FALSE	FALSE
47000	0	FALSE	FALSE	FALSE
47050	0	FALSE	FALSE	FALSE
47100	0	FALSE	FALSE	FALSE
47150	0	FALSE	FALSE	FALSE
47200	0	FALSE	FALSE	FALSE
47250	0	FALSE	FALSE	FALSE
47300	0	FALSE	FALSE	FALSE
47350	0	FALSE	FALSE	FALSE
47400	0	FALSE	FALSE	FALSE
47450	0	FALSE	FALSE	FALSE
47500	0	FALSE	FALSE	FALSE
47550	0	FALSE	FALSE	FALSE
47600	0	FALSE	FALSE	FALSE
47650	0	FALSE	FALSE	FALSE
47700	0	FALSE	FALSE	FALSE
47750	0	FALSE	FALSE	FALSE
47800	0	FALSE	FALSE	FALSE
47850	0	FALSE	FALSE	FALSE
47900	0	FALSE	FALSE	FALSE
47950	0	FALSE	FALSE	FALSE
48000	0	FALSE	FALSE	FALSE
48050	0	FALSE	FALSE	FALSE
48100	0	FALSE	FALSE	FALSE
48150	0	FALSE	FALSE	FALSE
48200	0	FALSE	FALSE	FALSE
48250	0	FALSE	FALSE	FALSE
48300	0	FALSE	FALSE	FALSE
48350	0	FALSE	FALSE	FALSE
48400	0	FALSE	FALSE	FALSE
48450	0	FALSE	FALSE	FALSE
48500	0	FALSE	FALSE	FALSE
48550	0	FALSE	FALSE	FALSE
48600	0	FALSE	FALSE	FALSE
48650	0	FALSE	FALSE	FALSE
48700	0	FALSE	FALSE	FALSE
48750	0	FALSE	FALSE	FALSE
48800	0	FALSE	FALSE	FALSE
48850	0	FALSE	FALSE	FALSE
48900	0	FALSE	FALSE	FALSE
48950	0	FALSE	FALSE	FALSE
49000	0	FALSE	FALSE	FALSE
49050	0	FALSE	FALSE	FALSE
49100	0	FALSE	FALSE	FALSE
49150	0	FALSE	FALSE	FALSE
49200	0	FALSE	FALSE	FALSE
49250	0	FALSE	FALSE	FALSE
49300	0	FALSE	FALSE	FALSE
49350	0	FALSE	FALSE	FALSE
49400	0	FALSE	FALSE	FALSE
49450	0	FALSE	FALSE	FALSE
49500	0	FALSE	FALSE	FALSE
49550	0	FALSE	FALSE	FALSE
49600	0	FALSE	FALSE	FALSE
49650	0	FALSE	FALSE	FALSE
49700	0	FALSE	FALSE	FALSE
49750	0	FALSE	FALSE	FALSE
49800	0	FALSE	FALSE	FALSE
49850	0	FALSE	FALSE	FALSE
49900	0	FALSE	FALSE	FALSE
49950	0	FALSE	FALSE	FALSE
50000	0	FALSE	FALSE	FALSE
50050	0	FALSE	FALSE	FALSE
50100	0	FALSE	FALSE	FALSE
50150	0	FALSE	FALSE	FALSE
50200	0	FALSE	FALSE	FALSE
50250	0	FALSE	FALSE	FALSE
50300	0	FALSE	FALSE	FALSE
50350	0	FALSE	FALSE	FALSE
50400	0	FALSE	FALSE	FALSE
50450	0	FALSE	FALSE	FALSE
50500	0	FALSE	FALSE	FALSE
50550	0	FALSE	FALSE	FALSE
50600	0	FALSE	FALSE	FALSE
50650	0	FALSE	FALSE	FALSE
50700	0	FALSE	FALSE	FALSE
50750	0	FALSE	FALSE	FALSE
50800	0	FALSE	FALSE	FALSE
50850	0	FALSE	FALSE	FALSE
50900	0	FALSE	FALSE	FALSE
50950	0	FALSE	FALSE	FALSE
51000	0	FALSE	FALSE	FALSE
51050	0	FALSE	FALSE	FALSE
51100	0	FALSE	FALSE	FALSE
51150	0	FALSE	FALSE	FALSE
51200	0	FALSE	FALSE	FALSE
51250	0	FALSE	FALSE	FALSE
51300	0	FALSE	FALSE	FALSE
51350	0	FALSE	FALSE	FALSE
51400	0	FALSE	FALSE	FALSE
51450	0	FALSE	FALSE	FALSE
51500	0	FALSE	FALSE	FALSE
51550	0	FALSE	FALSE	FALSE
51600	0	FALSE	FALSE	FALSE
51650	0	FALSE	FALSE	FALSE
51700	0	FALSE	FALSE	FALSE
51750	0	FALSE	FALSE	FALSE
51800	0	FALSE	FALSE	FALSE
51850	0	FALSE	FALSE	FALSE
51900	0	FALSE	FALSE	FALSE
51950	0	FALSE	FALSE	FALSE
52000	0	FALSE	FALSE	FALSE
52050	0	FALSE	FALSE	FALSE
52100	0	FALSE	FALSE	FALSE
52150	0	FALSE	FALSE	FALSE
52200	0	FALSE	FALSE	FALSE
52250	0	FALSE	FALSE	FALSE
52300	0	FALSE	FALSE	FALSE
52350	0	FALSE	FALSE	FALSE
52400	0	FALSE	FALSE	FALSE
52450	0	FALSE	FALSE	FALSE
52500	0	FALSE	FALSE	FALSE
52550	0	FALSE	FALSE	FALSE
52600	0	FALSE	FALSE	FALSE
52650	0	FALSE	FALSE	FALSE
52700	0	FALSE	FALSE	FALSE
52750	0	FALSE	FALSE	FALSE
52800	0	FALSE	FALSE	FALSE
52850	0	FALSE	FALSE	FALSE
52900	0	FALSE	FALSE	FALSE
52950	0	FALSE	FALSE	FALSE
53000	0	FALSE	FALSE	FALSE
53050	0	FALSE	FALSE	FALSE
53100	0	FALSE	FALSE	FALSE
53150	0	FALSE	FALSE	FALSE
53200	0	FALSE	FALSE	FALSE
53250	0	FALSE	FALSE	FALSE
53300	0	FALSE	FALSE	FALSE
53350	0	FALSE	FALSE	FALSE
53400	0	FALSE	FALSE	FALSE
53450	0	FALSE	FALSE	FALSE
53500	0	FALSE	FALSE	FALSE
53550	0	FALSE	FALSE	FALSE
53600	0	FALSE	FALSE	FALSE
53650	0	FALSE	FALSE	FALSE
53700	0	FALSE	FALSE	FALSE
53750	0	FALSE	FALSE	FALSE
53800	0	FALSE	FALSE	FALSE
53850	0	FALSE	FALSE	FALSE
53900	0	FALSE	FALSE	FALSE
53950	0	FALSE	FALSE	FALSE
54000	0	FALSE	FALSE	FALSE
54050	0	FALSE	FALSE	FALSE
54100	0	FALSE	FALSE	FALSE
54150	0	FALSE	FALSE	FALSE
54200	0	FALSE	FALSE	FALSE
54250	0	FALSE	FALSE	FALSE
54300	0	FALSE	FALSE	FALSE
54350	0	FALSE	FALSE	FALSE
54400	0	FALSE	FALSE	FALSE
54450	0	FALSE	FALSE	FALSE
54500	0	FALSE	FALSE	FALSE
54550	0	FALSE	FALSE	FALSE
54600	0	FALSE	FALSE	FALSE
54650	0	FALSE	FALSE	FALSE
54700	0	FALSE	FALSE	FALSE
54750	0	FALSE	FALSE	FALSE
54800	0	FALSE	FALSE	FALSE
54850	0	FALSE	FALSE	FALSE
54900	0	FALSE	FALSE	FALSE
54950	0	FALSE	FALSE	FALSE
55000	0	FALSE	FALSE	FALSE
55050	0	FALSE	FALSE	FALSE
55100	0	FALSE	FALSE	FALSE
55150	0	FALSE	FALSE	FALSE
55200	0	FALSE	FALSE	FALSE
55250	0	FALSE	FALSE	FALSE
55300	0	FALSE	FALSE	FALSE
55350	0	FALSE	FALSE	FALSE
55400	0	FALSE	FALSE	FALSE
55450	0	FALSE	FALSE	FALSE
55500	0	FALSE	FALSE	FALSE
55550	0	FALSE	FALSE	FALSE
55600	0	FALSE	FALSE	FALSE
55650	0	FALSE	FALSE	FALSE
55700	0	FALSE	FALSE	FALSE
55750	0	FALSE	FALSE	FALSE
55800	0	FALSE	FALSE	FALSE
55850	0	FALSE	FALSE	FALSE
55900	0	FALSE	FALSE	FALSE
55950	0	FALSE	FALSE	FALSE
56000	0	FALSE	FALSE	FALSE
56050	0	FALSE	FALSE	FALSE
56100	0	FALSE	FALSE	FALSE
56150	0	FALSE	FALSE	FALSE
56200	0	FALSE	FALSE	FALSE
56250	0	FALSE	FALSE	FALSE
56300	0	FALSE	FALSE	FALSE
56350	0	FALSE	FALSE	FALSE
56400	0	FALSE	FALSE	FALSE
56450	0	FALSE	FALSE	FALSE
56500	0	FALSE	FALSE	FALSE
56550	0	FALSE	FALSE	FALSE
56600	0	FALSE	FALSE	FALSE
56650	0	FALSE	FALSE	FALSE
56700	0	FALSE	FALSE	FALSE
56750	0	FALSE	FALSE	FALSE
56800	0	FALSE	FALSE	FALSE
56850	0	FALSE	FALSE	FALSE
56900	0	FALSE	FALSE	FALSE
56950	0	FALSE	FALSE	FALSE
57000	0	FALSE	FALSE	FALSE
57050	0	FALSE	FALSE	FALSE
57100	0	FALSE	FALSE	FALSE
57150	0	FALSE	FALSE	FALSE
57200	0	FALSE	FALSE	FALSE
57250	0	FALSE	FALSE	FALSE
57300	0	FALSE	FALSE	FALSE
57350	0	FALSE	FALSE	FALSE
57400	0	FALSE	FALSE	FALSE
57450	0	FALSE	FALSE	FALSE
57500	0	FALSE	FALSE	FALSE
57550	0	FALSE	FALSE	FALSE
57600	0	FALSE	FALSE	FALSE
57650	0	FALSE	FALSE	FALSE
57700	0	FALSE	FALSE	FALSE
57750	0	FALSE	FALSE	FALSE
57800	0	FALSE	FALSE	FALSE
57850	0	FALSE	FALSE	FALSE
57900	0	FALSE	FALSE	FALSE
57950	0	FALSE	FALSE	FALSE
58000	0	FALSE	FALSE	FALSE
58050	0	FALSE	FALSE	FALSE
58100	0	FALSE	FALSE	FALSE
58150	0	FALSE	FALSE	FALSE
58200	0	FALSE	FALSE	FALSE
58250	0	FALSE	FALSE	FALSE
58300	0	FALSE	FALSE	FALSE
58350	0	FALSE	FALSE	FALSE
58400	0	FALSE	FALSE	FALSE
58450	0	FALSE	FALSE	FALSE
58500	0	FALSE	FALSE	FALSE
58550	0	FALSE	FALSE	FALSE
58600	0	FALSE	FALSE	FALSE
58650	0	FALSE	FALSE	FALSE
58700	0	FALSE	FALSE	FALSE
58750	0	FALSE	FALSE	FALSE
58800	0	FALSE	FALSE	FALSE
58850	0	FALSE	FALSE	FALSE
58900	0	FALSE	FALSE	FALSE
58950	0	FALSE	FALSE	FALSE
59000	0	FALSE	FALSE	FALSE
59050	0	FALSE	FALSE	FALSE
59100	0	FALSE	FALSE	FALSE
59150	0	FALSE	FALSE	FALSE
59200	0	FALSE	FALSE	FALSE
59250	0	FALSE	FALSE	FALSE
59300	0	FALSE	FALSE	FALSE
59350	0	FALSE	FALSE	FALSE
59400	0	FALSE	FALSE	FALSE
59450	0	FALSE	FALSE	FALSE
59500	0	FALSE	FALSE	FALSE
59550	0	FALSE	FALSE	FALSE
59600	0	FALSE	FALSE	FALSE
59650	0	FALSE	FALSE	FALSE
59700	0	FALSE	FALSE	FALSE
59750	0	FALSE	FALSE	FALSE
59800	0	FALSE	FALSE	FALSE
59850	0	FALSE	FALSE	FALSE
59900	0	FALSE	FALSE	FALSE
59950	0	FALSE	FALSE	FALSE
60000	0	FALSE	FALSE	FALSE

## Sheet: Speleothem
Calculations
Age	SP Growth	SP Index
0		FALSE
50		FALSE
100		FALSE
150		FALSE
200		FALSE
250		FALSE
300		FALSE
350		FALSE
400		FALSE
450		FALSE
500		FALSE
550		FALSE
600		FALSE
650		FALSE
700		FALSE
750		FALSE
800		FALSE
850		FALSE
900		FALSE
950		FALSE
1000		FALSE
1050		FALSE
1100		FALSE
1150		FALSE
1200		FALSE
1250		FALSE
1300		FALSE
1350		FALSE
1400		FALSE
1450		FALSE
1500		FALSE
1550		FALSE
1600		FALSE
1650		FALSE
1700		FALSE
1750		FALSE
1800		FALSE
1850		FALSE
1900		FALSE
1950		FALSE
2000		FALSE
2050		FALSE
2100		FALSE
2150		FALSE
2200		FALSE
2250		FALSE
2300		FALSE
2350		FALSE
2400		FALSE
2450		FALSE
2500		FALSE
2550		FALSE
2600		FALSE
2650		FALSE
2700		FALSE
2750		FALSE
2800		FALSE
2850		FALSE
2900		FALSE
2950		FALSE
3000		FALSE
3050		FALSE
3100		FALSE
3150		FALSE
3200		FALSE
3250		FALSE
3300		FALSE
3350		FALSE
3400		FALSE
3450		FALSE
3500		FALSE
3550		FALSE
3600		FALSE
3650		FALSE
3700		FALSE
3750		FALSE
3800		FALSE
3850		FALSE
3900		FALSE
3950		FALSE
4000		FALSE
4050		FALSE
4100		FALSE
4150		FALSE
4200		FALSE
4250		FALSE
4300		FALSE
4350		FALSE
4400		FALSE
4450		FALSE
4500		FALSE
4550		FALSE
4600		FALSE
4650		FALSE
4700		FALSE
4750		FALSE
4800		FALSE
4850		FALSE
4900		FALSE
4950		FALSE
5000		FALSE
5050		FALSE
5100		FALSE
5150		FALSE
5200		FALSE
5250		FALSE
5300		FALSE
5350		FALSE
5400		FALSE
5450		FALSE
5500		FALSE
5550		FALSE
5600		FALSE
5650		FALSE
5700		FALSE
5750		FALSE
5800		FALSE
5850		FALSE
5900		FALSE
5950		FALSE
6000		FALSE
6050		FALSE
6100		FALSE
6150		FALSE
6200		FALSE
6250		FALSE
6300		FALSE
6350		FALSE
6400		FALSE
6450		FALSE
6500		FALSE
6550		FALSE
6600		FALSE
6650		FALSE
6700		FALSE
6750		FALSE
6800		FALSE
6850		FALSE
6900		FALSE
6950		FALSE
7000		FALSE
7050		FALSE
7100		FALSE
7150		FALSE
7200		FALSE
7250		FALSE
7300		FALSE
7350		FALSE
7400		FALSE
7450		FALSE
7500		FALSE
7550		FALSE
7600		FALSE
7650		FALSE
7700		FALSE
7750		FALSE
7800		FALSE
7850		FALSE
7900		FALSE
7950		FALSE
8000		FALSE
8050		FALSE
8100		FALSE
8150		FALSE
8200		FALSE
8250		FALSE
8300		FALSE
8350		FALSE
8400		FALSE
8450		FALSE
8500		FALSE
8550		FALSE
8600		FALSE
8650		FALSE
8700		FALSE
8750		FALSE
8800		FALSE
8850		FALSE
8900		FALSE
8950		FALSE
9000		FALSE
9050		FALSE
9100		FALSE
9150		FALSE
9200		FALSE
9250		FALSE
9300		FALSE
9350		FALSE
9400		FALSE
9450		FALSE
9500		FALSE
9550		FALSE
9600		FALSE
9650		FALSE
9700		FALSE
9750		FALSE
9800		FALSE
9850		FALSE
9900		FALSE
9950		FALSE
10000		FALSE
10050		FALSE
10100		FALSE
10150		FALSE
10200		FALSE
10250		FALSE
10300		FALSE
10350		FALSE
10400		FALSE
10450		FALSE
10500		FALSE
10550		FALSE
10600		FALSE
10650		FALSE
10700		FALSE
10750		FALSE
10800		FALSE
10850		FALSE
10900		FALSE
10950		FALSE
11000		FALSE
11050		FALSE
11100		FALSE
11150		FALSE
11200		FALSE
11250		FALSE
11300		FALSE
11350		FALSE
11400		FALSE
11450		FALSE
11500		FALSE
11550		FALSE
11600		FALSE
11650		FALSE
11700		FALSE
11750		FALSE
11800		FALSE
11850		FALSE
11900		FALSE
11950		FALSE
12000		FALSE
12050		FALSE
12100		FALSE
12150		FALSE
12200		FALSE
12250		FALSE
12300		FALSE
12350		FALSE
12400		FALSE
12450		FALSE
12500		FALSE
12550		FALSE
12600		FALSE
12650		FALSE
12700		FALSE
12750		FALSE
12800		FALSE
12850		FALSE
12900		FALSE
12950		FALSE
13000		FALSE
13050		FALSE
13100		FALSE
13150		FALSE
13200		FALSE
13250		FALSE
13300		FALSE
13350		FALSE
13400		FALSE
13450		FALSE
13500		FALSE
13550		FALSE
13600		FALSE
13650		FALSE
13700		FALSE
13750		FALSE
13800		FALSE
13850		FALSE
13900		FALSE
13950		FALSE
14000		FALSE
14050		FALSE
14100		FALSE
14150		FALSE
14200		FALSE
14250		FALSE
14300		FALSE
14350		FALSE
14400		FALSE
14450		FALSE
14500		FALSE
14550		FALSE
14600		FALSE
14650		FALSE
14700		FALSE
14750		FALSE
14800		FALSE
14850		FALSE
14900		FALSE
14950		FALSE
15000		FALSE
15050		FALSE
15100		FALSE
15150		FALSE
15200		FALSE
15250		FALSE
15300		FALSE
15350		FALSE
15400		FALSE
15450		FALSE
15500		FALSE
15550		FALSE
15600		FALSE
15650		FALSE
15700		FALSE
15750		FALSE
15800		FALSE
15850		FALSE
15900		FALSE
15950		FALSE
16000		FALSE
16050		FALSE
16100		FALSE
16150		FALSE
16200		FALSE
16250		FALSE
16300		FALSE
16350		FALSE
16400		FALSE
16450		FALSE
16500		FALSE
16550		FALSE
16600		FALSE
16650		FALSE
16700		FALSE
16750		FALSE
16800		FALSE
16850		FALSE
16900		FALSE
16950		FALSE
17000		FALSE
17050		FALSE
17100		FALSE
17150		FALSE
17200		FALSE
17250		FALSE
17300		FALSE
17350		FALSE
17400		FALSE
17450		FALSE
17500		FALSE
17550		FALSE
17600		FALSE
17650		FALSE
17700		FALSE
17750		FALSE
17800		FALSE
17850		FALSE
17900		FALSE
17950		FALSE
18000		FALSE
18050		FALSE
18100		FALSE
18150		FALSE
18200		FALSE
18250		FALSE
18300		FALSE
18350		FALSE
18400		FALSE
18450		FALSE
18500		FALSE
18550		FALSE
18600		FALSE
18650		FALSE
18700		FALSE
18750		FALSE
18800		FALSE
18850		FALSE
18900		FALSE
18950		FALSE
19000		FALSE
19050		FALSE
19100		FALSE
19150		FALSE
19200		FALSE
19250		FALSE
19300		FALSE
19350		FALSE
19400		FALSE
19450		FALSE
19500		FALSE
19550		FALSE
19600		FALSE
19650		FALSE
19700		FALSE
19750		FALSE
19800		FALSE
19850		FALSE
19900		FALSE
19950		FALSE
20000		FALSE
20050		FALSE
20100		FALSE
20150		FALSE
20200		FALSE
20250		FALSE
20300		FALSE
20350		FALSE
20400		FALSE
20450		FALSE
20500		FALSE
20550		FALSE
20600		FALSE
20650		FALSE
20700		FALSE
20750		FALSE
20800		FALSE
20850		FALSE
20900		FALSE
20950		FALSE
21000		FALSE
21050		FALSE
21100		FALSE
21150		FALSE
21200		FALSE
21250		FALSE
21300		FALSE
21350		FALSE
21400		FALSE
21450		FALSE
21500		FALSE
21550		FALSE
21600		FALSE
21650		FALSE
21700		FALSE
21750		FALSE
21800		FALSE
21850		FALSE
21900		FALSE
21950		FALSE
22000		FALSE
22050		FALSE
22100		FALSE
22150		FALSE
22200		FALSE
22250		FALSE
22300		FALSE
22350		FALSE
22400		FALSE
22450		FALSE
22500		FALSE
22550		FALSE
22600		FALSE
22650		FALSE
22700		FALSE
22750		FALSE
22800		FALSE
22850		FALSE
22900		FALSE
22950		FALSE
23000		FALSE
23050		FALSE
23100		FALSE
23150		FALSE
23200		FALSE
23250		FALSE
23300		FALSE
23350		FALSE
23400		FALSE
23450		FALSE
23500		FALSE
23550		FALSE
23600		FALSE
23650		FALSE
23700		FALSE
23750		FALSE
23800		FALSE
23850		FALSE
23900		FALSE
23950		FALSE
24000		FALSE
24050		FALSE
24100		FALSE
24150		FALSE
24200		FALSE
24250		FALSE
24300		FALSE
24350		FALSE
24400		FALSE
24450		FALSE
24500		FALSE
24550		FALSE
24600		FALSE
24650		FALSE
24700		FALSE
24750		FALSE
24800		FALSE
24850		FALSE
24900		FALSE
24950		FALSE
25000		FALSE
25050		FALSE
25100		FALSE
25150		FALSE
25200		FALSE
25250		FALSE
25300		FALSE
25350		FALSE
25400		FALSE
25450		FALSE
25500		FALSE
25550		FALSE
25600		FALSE
25650		FALSE
25700		FALSE
25750		FALSE
25800		FALSE
25850		FALSE
25900		FALSE
25950		FALSE
26000		FALSE
26050		FALSE
26100		FALSE
26150		FALSE
26200		FALSE
26250		FALSE
26300		FALSE
26350		FALSE
26400		FALSE
26450		FALSE
26500		FALSE
26550		FALSE
26600		FALSE
26650		FALSE
26700		FALSE
26750		FALSE
26800		FALSE
26850		FALSE
26900		FALSE
26950		FALSE
27000		FALSE
27050		FALSE
27100		FALSE
27150		FALSE
27200		FALSE
27250		FALSE
27300		FALSE
27350		FALSE
27400		FALSE
27450		FALSE
27500		FALSE
27550		FALSE
27600		FALSE
27650		FALSE
27700		FALSE
27750		FALSE
27800		FALSE
27850		FALSE
27900		FALSE
27950		FALSE
28000		FALSE
28050		FALSE
28100		FALSE
28150		FALSE
28200		FALSE
28250		FALSE
28300		FALSE
28350		FALSE
28400		FALSE
28450		FALSE
28500		FALSE
28550		FALSE
28600		FALSE
28650		FALSE
28700		FALSE
28750		FALSE
28800		FALSE
28850		FALSE
28900		FALSE
28950		FALSE
29000		FALSE
29050		FALSE
29100		FALSE
29150		FALSE
29200		FALSE
29250		FALSE
29300		FALSE
29350		FALSE
29400		FALSE
29450		FALSE
29500		FALSE
29550		FALSE
29600		FALSE
29650		FALSE
29700		FALSE
29750		FALSE
29800		FALSE
29850		FALSE
29900		FALSE
29950		FALSE
30000		FALSE
30050		FALSE
30100		FALSE
30150		FALSE
30200		FALSE
30250		FALSE
30300		FALSE
30350		FALSE
30400		FALSE
30450		FALSE
30500		FALSE
30550		FALSE
30600		FALSE
30650		FALSE
30700		FALSE
30750		FALSE
30800		FALSE
30850		FALSE
30900		FALSE
30950		FALSE
31000		FALSE
31050		FALSE
31100		FALSE
31150		FALSE
31200		FALSE
31250		FALSE
31300		FALSE
31350		FALSE
31400		FALSE
31450		FALSE
31500		FALSE
31550		FALSE
31600		FALSE
31650		FALSE
31700		FALSE
31750		FALSE
31800		FALSE
31850		FALSE
31900		FALSE
31950		FALSE
32000		FALSE
32050		FALSE
32100		FALSE
32150		FALSE
32200		FALSE
32250		FALSE
32300		FALSE
32350		FALSE
32400		FALSE
32450		FALSE
32500		FALSE
32550		FALSE
32600		FALSE
32650		FALSE
32700		FALSE
32750		FALSE
32800		FALSE
32850		FALSE
32900		FALSE
32950		FALSE
33000		FALSE
33050		FALSE
33100		FALSE
33150		FALSE
33200		FALSE
33250		FALSE
33300		FALSE
33350		FALSE
33400		FALSE
33450		FALSE
33500		FALSE
33550		FALSE
33600		FALSE
33650		FALSE
33700		FALSE
33750		FALSE
33800		FALSE
33850		FALSE
33900		FALSE
33950		FALSE
34000		FALSE
34050		FALSE
34100		FALSE
34150		FALSE
34200		FALSE
34250		FALSE
34300		FALSE
34350		FALSE
34400		FALSE
34450		FALSE
34500		FALSE
34550		FALSE
34600		FALSE
34650		FALSE
34700		FALSE
34750		FALSE
34800		FALSE
34850		FALSE
34900		FALSE
34950		FALSE
35000		FALSE
35050		FALSE
35100		FALSE
35150		FALSE
35200		FALSE
35250		FALSE
35300		FALSE
35350		FALSE
35400		FALSE
35450		FALSE
35500		FALSE
35550		FALSE
35600		FALSE
35650		FALSE
35700		FALSE
35750		FALSE
35800		FALSE
35850		FALSE
35900		FALSE
35950		FALSE
36000		FALSE
36050		FALSE
36100		FALSE
36150		FALSE
36200		FALSE
36250		FALSE
36300		FALSE
36350		FALSE
36400		FALSE
36450		FALSE
36500		FALSE
36550		FALSE
36600		FALSE
36650		FALSE
36700		FALSE
36750		FALSE
36800		FALSE
36850		FALSE
36900		FALSE
36950		FALSE
37000		FALSE
37050		FALSE
37100		FALSE
37150		FALSE
37200		FALSE
37250		FALSE
37300		FALSE
37350		FALSE
37400		FALSE
37450		FALSE
37500		FALSE
37550		FALSE
37600		FALSE
37650		FALSE
37700		FALSE
37750		FALSE
37800		FALSE
37850		FALSE
37900		FALSE
37950		FALSE
38000		FALSE
38050		FALSE
38100		FALSE
38150		FALSE
38200		FALSE
38250		FALSE
38300		FALSE
38350		FALSE
38400		FALSE
38450		FALSE
38500		FALSE
38550		FALSE
38600		FALSE
38650		FALSE
38700		FALSE
38750		FALSE
38800		FALSE
38850		FALSE
38900		FALSE
38950		FALSE
39000		FALSE
39050		FALSE
39100		FALSE
39150		FALSE
39200		FALSE
39250		FALSE
39300		FALSE
39350		FALSE
39400		FALSE
39450		FALSE
39500		FALSE
39550		FALSE
39600		FALSE
39650		FALSE
39700		FALSE
39750		FALSE
39800		FALSE
39850		FALSE
39900		FALSE
39950		FALSE
40000		FALSE
40050		FALSE
40100		FALSE
40150		FALSE
40200		FALSE
40250		FALSE
40300		FALSE
40350		FALSE
40400		FALSE
40450		FALSE
40500		FALSE
40550		FALSE
40600		FALSE
40650		FALSE
40700		FALSE
40750		FALSE
40800		FALSE
40850		FALSE
40900		FALSE
40950		FALSE
41000		FALSE
41050		FALSE
41100		FALSE
41150		FALSE
41200		FALSE
41250		FALSE
41300		FALSE
41350		FALSE
41400		FALSE
41450		FALSE
41500		FALSE
41550		FALSE
41600		FALSE
41650		FALSE
41700		FALSE
41750		FALSE
41800		FALSE
41850		FALSE
41900		FALSE
41950		FALSE
42000		FALSE
42050		FALSE
42100		FALSE
42150		FALSE
42200		FALSE
42250		FALSE
42300		FALSE
42350		FALSE
42400		FALSE
42450		FALSE
42500		FALSE
42550		FALSE
42600		FALSE
42650		FALSE
42700		FALSE
42750		FALSE
42800		FALSE
42850		FALSE
42900		FALSE
42950		FALSE
43000		FALSE
43050		FALSE
43100		FALSE
43150		FALSE
43200		FALSE
43250		FALSE
43300		FALSE
43350		FALSE
43400		FALSE
43450		FALSE
43500		FALSE
43550		FALSE
43600		FALSE
43650		FALSE
43700		FALSE
43750		FALSE
43800		FALSE
43850		FALSE
43900		FALSE
43950		FALSE
44000		FALSE
44050		FALSE
44100		FALSE
44150		FALSE
44200		FALSE
44250		FALSE
44300		FALSE
44350		FALSE
44400		FALSE
44450		FALSE
44500		FALSE
44550		FALSE
44600		FALSE
44650		FALSE
44700		FALSE
44750		FALSE
44800		FALSE
44850		FALSE
44900		FALSE
44950		FALSE
45000		FALSE
45050		FALSE
45100		FALSE
45150		FALSE
45200		FALSE
45250		FALSE
45300		FALSE
45350		FALSE
45400		FALSE
45450		FALSE
45500		FALSE
45550		FALSE
45600		FALSE
45650		FALSE
45700		FALSE
45750		FALSE
45800		FALSE
45850		FALSE
45900		FALSE
45950		FALSE
46000		FALSE
46050		FALSE
46100		FALSE
46150		FALSE
46200		FALSE
46250		FALSE
46300		FALSE
46350		FALSE
46400		FALSE
46450		FALSE
46500		FALSE
46550		FALSE
46600		FALSE
46650		FALSE
46700		FALSE
46750		FALSE
46800		FALSE
46850		FALSE
46900		FALSE
46950		FALSE
47000		FALSE
47050		FALSE
47100		FALSE
47150		FALSE
47200		FALSE
47250		FALSE
47300		FALSE
47350		FALSE
47400		FALSE
47450		FALSE
47500		FALSE
47550		FALSE
47600		FALSE
47650		FALSE
47700		FALSE
47750		FALSE
47800		FALSE
47850		FALSE
47900		FALSE
47950		FALSE
48000		FALSE
48050		FALSE
48100		FALSE
48150		FALSE
48200		FALSE
48250		FALSE
48300		FALSE
48350		FALSE
48400		FALSE
48450		FALSE
48500		FALSE
48550		FALSE
48600		FALSE
48650		FALSE
48700		FALSE
48750		FALSE
48800		FALSE
48850		FALSE
48900		FALSE
48950		FALSE
49000		FALSE
49050		FALSE
49100		FALSE
49150		FALSE
49200		FALSE
49250		FALSE
49300		FALSE
49350		FALSE
49400		FALSE
49450		FALSE
49500		FALSE
49550		FALSE
49600		FALSE
49650		FALSE
49700		FALSE
49750		FALSE
49800		FALSE
49850		FALSE
49900		FALSE
49950		FALSE
50000		FALSE
50050		FALSE
50100		FALSE
50150		FALSE
50200		FALSE
50250		FALSE
50300		FALSE
50350		FALSE
50400		FALSE
50450		FALSE
50500		FALSE
50550		FALSE
50600		FALSE
50650		FALSE
50700		FALSE
50750		FALSE
50800		FALSE
50850		FALSE
50900		FALSE
50950		FALSE
51000		FALSE
51050		FALSE
51100		FALSE
51150		FALSE
51200		FALSE
51250		FALSE
51300		FALSE
51350		FALSE
51400		FALSE
51450		FALSE
51500		FALSE
51550		FALSE
51600		FALSE
51650		FALSE
51700		FALSE
51750		FALSE
51800		FALSE
51850		FALSE
51900		FALSE
51950		FALSE
52000		FALSE
52050		FALSE
52100		FALSE
52150		FALSE
52200		FALSE
52250		FALSE
52300		FALSE
52350		FALSE
52400		FALSE
52450		FALSE
52500		FALSE
52550		FALSE
52600		FALSE
52650		FALSE
52700		FALSE
52750		FALSE
52800		FALSE
52850		FALSE
52900		FALSE
52950		FALSE
53000		FALSE
53050		FALSE
53100		FALSE
53150		FALSE
53200		FALSE
53250		FALSE
53300		FALSE
53350		FALSE
53400		FALSE
53450		FALSE
53500		FALSE
53550		FALSE
53600		FALSE
53650		FALSE
53700		FALSE
53750		FALSE
53800		FALSE
53850		FALSE
53900		FALSE
53950		FALSE
54000		FALSE
54050		FALSE
54100		FALSE
54150		FALSE
54200		FALSE
54250		FALSE
54300		FALSE
54350		FALSE
54400		FALSE
54450		FALSE
54500		FALSE
54550		FALSE
54600		FALSE
54650		FALSE
54700		FALSE
54750		FALSE
54800		FALSE
54850		FALSE
54900		FALSE
54950		FALSE
55000		FALSE
55050		FALSE
55100		FALSE
55150		FALSE
55200		FALSE
55250		FALSE
55300		FALSE
55350		FALSE
55400		FALSE
55450		FALSE
55500		FALSE
55550		FALSE
55600		FALSE
55650		FALSE
55700		FALSE
55750		FALSE
55800		FALSE
55850		FALSE
55900		FALSE
55950		FALSE
56000		FALSE
56050		FALSE
56100		FALSE
56150		FALSE
56200		FALSE
56250		FALSE
56300		FALSE
56350		FALSE
56400		FALSE
56450		FALSE
56500		FALSE
56550		FALSE
56600		FALSE
56650		FALSE
56700		FALSE
56750		FALSE
56800		FALSE
56850		FALSE
56900		FALSE
56950		FALSE
57000		FALSE
57050		FALSE
57100		FALSE
57150		FALSE
57200		FALSE
57250		FALSE
57300		FALSE
57350		FALSE
57400		FALSE
57450		FALSE
57500		FALSE
57550		FALSE
57600		FALSE
57650		FALSE
57700		FALSE
57750		FALSE
57800		FALSE
57850		FALSE
57900		FALSE
57950		FALSE
58000		FALSE
58050		FALSE
58100		FALSE
58150		FALSE
58200		FALSE
58250		FALSE
58300		FALSE
58350		FALSE
58400		FALSE
58450		FALSE
58500		FALSE
58550		FALSE
58600		FALSE
58650		FALSE
58700		FALSE
58750		FALSE
58800		FALSE
58850		FALSE
58900		FALSE
58950		FALSE
59000		FALSE
59050		FALSE
59100		FALSE
59150		FALSE
59200		FALSE
59250		FALSE
59300		FALSE
59350		FALSE
59400		FALSE
59450		FALSE
59500		FALSE
59550		FALSE
59600		FALSE
59650		FALSE
59700		FALSE
59750		FALSE
59800		FALSE
59850		FALSE
59900		FALSE
59950		FALSE
60000		FALSE

## Sheet: Tree Pollen
Calculations
Age	% Tree Pollen	Pollen-Index
0		FALSE
50		FALSE
100		FALSE
150		FALSE
200		FALSE
250		FALSE
300		FALSE
350		FALSE
400		FALSE
450		FALSE
500		FALSE
550		FALSE
600		FALSE
650		FALSE
700		FALSE
750		FALSE
800		FALSE
850		FALSE
900		FALSE
950		FALSE
1000		FALSE
1050		FALSE
1100		FALSE
1150		FALSE
1200		FALSE
1250		FALSE
1300		FALSE
1350		FALSE
1400		FALSE
1450		FALSE
1500		FALSE
1550		FALSE
1600		FALSE
1650		FALSE
1700		FALSE
1750		FALSE
1800		FALSE
1850		FALSE
1900		FALSE
1950		FALSE
2000		FALSE
2050		FALSE
2100		FALSE
2150		FALSE
2200		FALSE
2250		FALSE
2300		FALSE
2350		FALSE
2400		FALSE
2450		FALSE
2500		FALSE
2550		FALSE
2600		FALSE
2650		FALSE
2700		FALSE
2750		FALSE
2800		FALSE
2850		FALSE
2900		FALSE
2950		FALSE
3000		FALSE
3050		FALSE
3100		FALSE
3150		FALSE
3200		FALSE
3250		FALSE
3300		FALSE
3350		FALSE
3400		FALSE
3450		FALSE
3500		FALSE
3550		FALSE
3600		FALSE
3650		FALSE
3700		FALSE
3750		FALSE
3800		FALSE
3850		FALSE
3900		FALSE
3950		FALSE
4000		FALSE
4050		FALSE
4100		FALSE
4150		FALSE
4200		FALSE
4250		FALSE
4300		FALSE
4350		FALSE
4400		FALSE
4450		FALSE
4500		FALSE
4550		FALSE
4600		FALSE
4650		FALSE
4700		FALSE
4750		FALSE
4800		FALSE
4850		FALSE
4900		FALSE
4950		FALSE
5000		FALSE
5050		FALSE
5100		FALSE
5150		FALSE
5200		FALSE
5250		FALSE
5300		FALSE
5350		FALSE
5400		FALSE
5450		FALSE
5500		FALSE
5550		FALSE
5600		FALSE
5650		FALSE
5700		FALSE
5750		FALSE
5800		FALSE
5850		FALSE
5900		FALSE
5950		FALSE
6000		FALSE
6050		FALSE
6100		FALSE
6150		FALSE
6200		FALSE
6250		FALSE
6300		FALSE
6350		FALSE
6400		FALSE
6450		FALSE
6500		FALSE
6550		FALSE
6600		FALSE
6650		FALSE
6700		FALSE
6750		FALSE
6800		FALSE
6850		FALSE
6900		FALSE
6950		FALSE
7000		FALSE
7050		FALSE
7100		FALSE
7150		FALSE
7200		FALSE
7250		FALSE
7300		FALSE
7350		FALSE
7400		FALSE
7450		FALSE
7500		FALSE
7550		FALSE
7600		FALSE
7650		FALSE
7700		FALSE
7750		FALSE
7800		FALSE
7850		FALSE
7900		FALSE
7950		FALSE
8000		FALSE
8050		FALSE
8100		FALSE
8150		FALSE
8200		FALSE
8250		FALSE
8300		FALSE
8350		FALSE
8400		FALSE
8450		FALSE
8500		FALSE
8550		FALSE
8600		FALSE
8650		FALSE
8700		FALSE
8750		FALSE
8800		FALSE
8850		FALSE
8900		FALSE
8950		FALSE
9000		FALSE
9050		FALSE
9100		FALSE
9150		FALSE
9200		FALSE
9250		FALSE
9300		FALSE
9350		FALSE
9400		FALSE
9450		FALSE
9500		FALSE
9550		FALSE
9600		FALSE
9650		FALSE
9700		FALSE
9750		FALSE
9800		FALSE
9850		FALSE
9900		FALSE
9950		FALSE
10000		FALSE
10050		FALSE
10100		FALSE
10150		FALSE
10200		FALSE
10250		FALSE
10300		FALSE
10350		FALSE
10400		FALSE
10450		FALSE
10500		FALSE
10550		FALSE
10600		FALSE
10650		FALSE
10700		FALSE
10750		FALSE
10800		FALSE
10850		FALSE
10900		FALSE
10950		FALSE
11000		FALSE
11050		FALSE
11100		FALSE
11150		FALSE
11200		FALSE
11250		FALSE
11300		FALSE
11350		FALSE
11400		FALSE
11450		FALSE
11500		FALSE
11550		FALSE
11600		FALSE
11650		FALSE
11700		FALSE
11750		FALSE
11800		FALSE
11850		FALSE
11900		FALSE
11950		FALSE
12000		FALSE
12050		FALSE
12100		FALSE
12150		FALSE
12200		FALSE
12250		FALSE
12300		FALSE
12350		FALSE
12400		FALSE
12450		FALSE
12500		FALSE
12550		FALSE
12600		FALSE
12650		FALSE
12700		FALSE
12750		FALSE
12800		FALSE
12850		FALSE
12900		FALSE
12950		FALSE
13000		FALSE
13050		FALSE
13100		FALSE
13150		FALSE
13200		FALSE
13250		FALSE
13300		FALSE
13350		FALSE
13400		FALSE
13450		FALSE
13500		FALSE
13550		FALSE
13600		FALSE
13650		FALSE
13700		FALSE
13750		FALSE
13800		FALSE
13850		FALSE
13900		FALSE
13950		FALSE
14000		FALSE
14050		FALSE
14100		FALSE
14150		FALSE
14200		FALSE
14250		FALSE
14300		FALSE
14350		FALSE
14400		FALSE
14450		FALSE
14500		FALSE
14550		FALSE
14600		FALSE
14650		FALSE
14700		FALSE
14750		FALSE
14800		FALSE
14850		FALSE
14900		FALSE
14950		FALSE
15000		FALSE
15050		FALSE
15100		FALSE
15150		FALSE
15200		FALSE
15250		FALSE
15300		FALSE
15350		FALSE
15400		FALSE
15450		FALSE
15500		FALSE
15550		FALSE
15600		FALSE
15650		FALSE
15700		FALSE
15750		FALSE
15800		FALSE
15850		FALSE
15900		FALSE
15950		FALSE
16000		FALSE
16050		FALSE
16100		FALSE
16150		FALSE
16200		FALSE
16250		FALSE
16300		FALSE
16350		FALSE
16400		FALSE
16450		FALSE
16500		FALSE
16550		FALSE
16600		FALSE
16650		FALSE
16700		FALSE
16750		FALSE
16800		FALSE
16850		FALSE
16900		FALSE
16950		FALSE
17000		FALSE
17050		FALSE
17100		FALSE
17150		FALSE
17200		FALSE
17250		FALSE
17300		FALSE
17350		FALSE
17400		FALSE
17450		FALSE
17500		FALSE
17550		FALSE
17600		FALSE
17650		FALSE
17700		FALSE
17750		FALSE
17800		FALSE
17850		FALSE
17900		FALSE
17950		FALSE
18000		FALSE
18050		FALSE
18100		FALSE
18150		FALSE
18200		FALSE
18250		FALSE
18300		FALSE
18350		FALSE
18400		FALSE
18450		FALSE
18500		FALSE
18550		FALSE
18600		FALSE
18650		FALSE
18700		FALSE
18750		FALSE
18800		FALSE
18850		FALSE
18900		FALSE
18950		FALSE
19000		FALSE
19050		FALSE
19100		FALSE
19150		FALSE
19200		FALSE
19250		FALSE
19300		FALSE
19350		FALSE
19400		FALSE
19450		FALSE
19500		FALSE
19550		FALSE
19600		FALSE
19650		FALSE
19700		FALSE
19750		FALSE
19800		FALSE
19850		FALSE
19900		FALSE
19950		FALSE
20000		FALSE
20050		FALSE
20100		FALSE
20150		FALSE
20200		FALSE
20250		FALSE
20300		FALSE
20350		FALSE
20400		FALSE
20450		FALSE
20500		FALSE
20550		FALSE
20600		FALSE
20650		FALSE
20700		FALSE
20750		FALSE
20800		FALSE
20850		FALSE
20900		FALSE
20950		FALSE
21000		FALSE
21050		FALSE
21100		FALSE
21150		FALSE
21200		FALSE
21250		FALSE
21300		FALSE
21350		FALSE
21400		FALSE
21450		FALSE
21500		FALSE
21550		FALSE
21600		FALSE
21650		FALSE
21700		FALSE
21750		FALSE
21800		FALSE
21850		FALSE
21900		FALSE
21950		FALSE
22000		FALSE
22050		FALSE
22100		FALSE
22150		FALSE
22200		FALSE
22250		FALSE
22300		FALSE
22350		FALSE
22400		FALSE
22450		FALSE
22500		FALSE
22550		FALSE
22600		FALSE
22650		FALSE
22700		FALSE
22750		FALSE
22800		FALSE
22850		FALSE
22900		FALSE
22950		FALSE
23000		FALSE
23050		FALSE
23100		FALSE
23150		FALSE
23200		FALSE
23250		FALSE
23300		FALSE
23350		FALSE
23400		FALSE
23450		FALSE
23500		FALSE
23550		FALSE
23600		FALSE
23650		FALSE
23700		FALSE
23750		FALSE
23800		FALSE
23850		FALSE
23900		FALSE
23950		FALSE
24000		FALSE
24050		FALSE
24100		FALSE
24150		FALSE
24200		FALSE
24250		FALSE
24300		FALSE
24350		FALSE
24400		FALSE
24450		FALSE
24500		FALSE
24550		FALSE
24600		FALSE
24650		FALSE
24700		FALSE
24750		FALSE
24800		FALSE
24850		FALSE
24900		FALSE
24950		FALSE
25000		FALSE
25050		FALSE
25100		FALSE
25150		FALSE
25200		FALSE
25250		FALSE
25300		FALSE
25350		FALSE
25400		FALSE
25450		FALSE
25500		FALSE
25550		FALSE
25600		FALSE
25650		FALSE
25700		FALSE
25750		FALSE
25800		FALSE
25850		FALSE
25900		FALSE
25950		FALSE
26000		FALSE
26050		FALSE
26100		FALSE
26150		FALSE
26200		FALSE
26250		FALSE
26300		FALSE
26350		FALSE
26400		FALSE
26450		FALSE
26500		FALSE
26550		FALSE
26600		FALSE
26650		FALSE
26700		FALSE
26750		FALSE
26800		FALSE
26850		FALSE
26900		FALSE
26950		FALSE
27000		FALSE
27050		FALSE
27100		FALSE
27150		FALSE
27200		FALSE
27250		FALSE
27300		FALSE
27350		FALSE
27400		FALSE
27450		FALSE
27500		FALSE
27550		FALSE
27600		FALSE
27650		FALSE
27700		FALSE
27750		FALSE
27800		FALSE
27850		FALSE
27900		FALSE
27950		FALSE
28000		FALSE
28050		FALSE
28100		FALSE
28150		FALSE
28200		FALSE
28250		FALSE
28300		FALSE
28350		FALSE
28400		FALSE
28450		FALSE
28500		FALSE
28550		FALSE
28600		FALSE
28650		FALSE
28700		FALSE
28750		FALSE
28800		FALSE
28850		FALSE
28900		FALSE
28950		FALSE
29000		FALSE
29050		FALSE
29100		FALSE
29150		FALSE
29200		FALSE
29250		FALSE
29300		FALSE
29350		FALSE
29400		FALSE
29450		FALSE
29500		FALSE
29550		FALSE
29600		FALSE
29650		FALSE
29700		FALSE
29750		FALSE
29800		FALSE
29850		FALSE
29900		FALSE
29950		FALSE
30000		FALSE
30050		FALSE
30100		FALSE
30150		FALSE
30200		FALSE
30250		FALSE
30300		FALSE
30350		FALSE
30400		FALSE
30450		FALSE
30500		FALSE
30550		FALSE
30600		FALSE
30650		FALSE
30700		FALSE
30750		FALSE
30800		FALSE
30850		FALSE
30900		FALSE
30950		FALSE
31000		FALSE
31050		FALSE
31100		FALSE
31150		FALSE
31200		FALSE
31250		FALSE
31300		FALSE
31350		FALSE
31400		FALSE
31450		FALSE
31500		FALSE
31550		FALSE
31600		FALSE
31650		FALSE
31700		FALSE
31750		FALSE
31800		FALSE
31850		FALSE
31900		FALSE
31950		FALSE
32000		FALSE
32050		FALSE
32100		FALSE
32150		FALSE
32200		FALSE
32250		FALSE
32300		FALSE
32350		FALSE
32400		FALSE
32450		FALSE
32500		FALSE
32550		FALSE
32600		FALSE
32650		FALSE
32700		FALSE
32750		FALSE
32800		FALSE
32850		FALSE
32900		FALSE
32950		FALSE
33000		FALSE
33050		FALSE
33100		FALSE
33150		FALSE
33200		FALSE
33250		FALSE
33300		FALSE
33350		FALSE
33400		FALSE
33450		FALSE
33500		FALSE
33550		FALSE
33600		FALSE
33650		FALSE
33700		FALSE
33750		FALSE
33800		FALSE
33850		FALSE
33900		FALSE
33950		FALSE
34000		FALSE
34050		FALSE
34100		FALSE
34150		FALSE
34200		FALSE
34250		FALSE
34300		FALSE
34350		FALSE
34400		FALSE
34450		FALSE
34500		FALSE
34550		FALSE
34600		FALSE
34650		FALSE
34700		FALSE
34750		FALSE
34800		FALSE
34850		FALSE
34900		FALSE
34950		FALSE
35000		FALSE
35050		FALSE
35100		FALSE
35150		FALSE
35200		FALSE
35250		FALSE
35300		FALSE
35350		FALSE
35400		FALSE
35450		FALSE
35500		FALSE
35550		FALSE
35600		FALSE
35650		FALSE
35700		FALSE
35750		FALSE
35800		FALSE
35850		FALSE
35900		FALSE
35950		FALSE
36000		FALSE
36050		FALSE
36100		FALSE
36150		FALSE
36200		FALSE
36250		FALSE
36300		FALSE
36350		FALSE
36400		FALSE
36450		FALSE
36500		FALSE
36550		FALSE
36600		FALSE
36650		FALSE
36700		FALSE
36750		FALSE
36800		FALSE
36850		FALSE
36900		FALSE
36950		FALSE
37000		FALSE
37050		FALSE
37100		FALSE
37150		FALSE
37200		FALSE
37250		FALSE
37300		FALSE
37350		FALSE
37400		FALSE
37450		FALSE
37500		FALSE
37550		FALSE
37600		FALSE
37650		FALSE
37700		FALSE
37750		FALSE
37800		FALSE
37850		FALSE
37900		FALSE
37950		FALSE
38000		FALSE
38050		FALSE
38100		FALSE
38150		FALSE
38200		FALSE
38250		FALSE
38300		FALSE
38350		FALSE
38400		FALSE
38450		FALSE
38500		FALSE
38550		FALSE
38600		FALSE
38650		FALSE
38700		FALSE
38750		FALSE
38800		FALSE
38850		FALSE
38900		FALSE
38950		FALSE
39000		FALSE
39050		FALSE
39100		FALSE
39150		FALSE
39200		FALSE
39250		FALSE
39300		FALSE
39350		FALSE
39400		FALSE
39450		FALSE
39500		FALSE
39550		FALSE
39600		FALSE
39650		FALSE
39700		FALSE
39750		FALSE
39800		FALSE
39850		FALSE
39900		FALSE
39950		FALSE
40000		FALSE
40050		FALSE
40100		FALSE
40150		FALSE
40200		FALSE
40250		FALSE
40300		FALSE
40350		FALSE
40400		FALSE
40450		FALSE
40500		FALSE
40550		FALSE
40600		FALSE
40650		FALSE
40700		FALSE
40750		FALSE
40800		FALSE
40850		FALSE
40900		FALSE
40950		FALSE
41000		FALSE
41050		FALSE
41100		FALSE
41150		FALSE
41200		FALSE
41250		FALSE
41300		FALSE
41350		FALSE
41400		FALSE
41450		FALSE
41500		FALSE
41550		FALSE
41600		FALSE
41650		FALSE
41700		FALSE
41750		FALSE
41800		FALSE
41850		FALSE
41900		FALSE
41950		FALSE
42000		FALSE
42050		FALSE
42100		FALSE
42150		FALSE
42200		FALSE
42250		FALSE
42300		FALSE
42350		FALSE
42400		FALSE
42450		FALSE
42500		FALSE
42550		FALSE
42600		FALSE
42650		FALSE
42700		FALSE
42750		FALSE
42800		FALSE
42850		FALSE
42900		FALSE
42950		FALSE
43000		FALSE
43050		FALSE
43100		FALSE
43150		FALSE
43200		FALSE
43250		FALSE
43300		FALSE
43350		FALSE
43400		FALSE
43450		FALSE
43500		FALSE
43550		FALSE
43600		FALSE
43650		FALSE
43700		FALSE
43750		FALSE
43800		FALSE
43850		FALSE
43900		FALSE
43950		FALSE
44000		FALSE
44050		FALSE
44100		FALSE
44150		FALSE
44200		FALSE
44250		FALSE
44300		FALSE
44350		FALSE
44400		FALSE
44450		FALSE
44500		FALSE
44550		FALSE
44600		FALSE
44650		FALSE
44700		FALSE
44750		FALSE
44800		FALSE
44850		FALSE
44900		FALSE
44950		FALSE
45000		FALSE
45050		FALSE
45100		FALSE
45150		FALSE
45200		FALSE
45250		FALSE
45300		FALSE
45350		FALSE
45400		FALSE
45450		FALSE
45500		FALSE
45550		FALSE
45600		FALSE
45650		FALSE
45700		FALSE
45750		FALSE
45800		FALSE
45850		FALSE
45900		FALSE
45950		FALSE
46000		FALSE
46050		FALSE
46100		FALSE
46150		FALSE
46200		FALSE
46250		FALSE
46300		FALSE
46350		FALSE
46400		FALSE
46450		FALSE
46500		FALSE
46550		FALSE
46600		FALSE
46650		FALSE
46700		FALSE
46750		FALSE
46800		FALSE
46850		FALSE
46900		FALSE
46950		FALSE
47000		FALSE
47050		FALSE
47100		FALSE
47150		FALSE
47200		FALSE
47250		FALSE
47300		FALSE
47350		FALSE
47400		FALSE
47450		FALSE
47500		FALSE
47550		FALSE
47600		FALSE
47650		FALSE
47700		FALSE
47750		FALSE
47800		FALSE
47850		FALSE
47900		FALSE
47950		FALSE
48000		FALSE
48050		FALSE
48100		FALSE
48150		FALSE
48200		FALSE
48250		FALSE
48300		FALSE
48350		FALSE
48400		FALSE
48450		FALSE
48500		FALSE
48550		FALSE
48600		FALSE
48650		FALSE
48700		FALSE
48750		FALSE
48800		FALSE
48850		FALSE
48900		FALSE
48950		FALSE
49000		FALSE
49050		FALSE
49100		FALSE
49150		FALSE
49200		FALSE
49250		FALSE
49300		FALSE
49350		FALSE
49400		FALSE
49450		FALSE
49500		FALSE
49550		FALSE
49600		FALSE
49650		FALSE
49700		FALSE
49750		FALSE
49800		FALSE
49850		FALSE
49900		FALSE
49950		FALSE
50000		FALSE
50050		FALSE
50100		FALSE
50150		FALSE
50200		FALSE
50250		FALSE
50300		FALSE
50350		FALSE
50400		FALSE
50450		FALSE
50500		FALSE
50550		FALSE
50600		FALSE
50650		FALSE
50700		FALSE
50750		FALSE
50800		FALSE
50850		FALSE
50900		FALSE
50950		FALSE
51000		FALSE
51050		FALSE
51100		FALSE
51150		FALSE
51200		FALSE
51250		FALSE
51300		FALSE
51350		FALSE
51400		FALSE
51450		FALSE
51500		FALSE
51550		FALSE
51600		FALSE
51650		FALSE
51700		FALSE
51750		FALSE
51800		FALSE
51850		FALSE
51900		FALSE
51950		FALSE
52000		FALSE
52050		FALSE
52100		FALSE
52150		FALSE
52200		FALSE
52250		FALSE
52300		FALSE
52350		FALSE
52400		FALSE
52450		FALSE
52500		FALSE
52550		FALSE
52600		FALSE
52650		FALSE
52700		FALSE
52750		FALSE
52800		FALSE
52850		FALSE
52900		FALSE
52950		FALSE
53000		FALSE
53050		FALSE
53100		FALSE
53150		FALSE
53200		FALSE
53250		FALSE
53300		FALSE
53350		FALSE
53400		FALSE
53450		FALSE
53500		FALSE
53550		FALSE
53600		FALSE
53650		FALSE
53700		FALSE
53750		FALSE
53800		FALSE
53850		FALSE
53900		FALSE
53950		FALSE
54000		FALSE
54050		FALSE
54100		FALSE
54150		FALSE
54200		FALSE
54250		FALSE
54300		FALSE
54350		FALSE
54400		FALSE
54450		FALSE
54500		FALSE
54550		FALSE
54600		FALSE
54650		FALSE
54700		FALSE
54750		FALSE
54800		FALSE
54850		FALSE
54900		FALSE
54950		FALSE
55000		FALSE
55050		FALSE
55100		FALSE
55150		FALSE
55200		FALSE
55250		FALSE
55300		FALSE
55350		FALSE
55400		FALSE
55450		FALSE
55500		FALSE
55550		FALSE
55600		FALSE
55650		FALSE
55700		FALSE
55750		FALSE
55800		FALSE
55850		FALSE
55900		FALSE
55950		FALSE
56000		FALSE
56050		FALSE
56100		FALSE
56150		FALSE
56200		FALSE
56250		FALSE
56300		FALSE
56350		FALSE
56400		FALSE
56450		FALSE
56500		FALSE
56550		FALSE
56600		FALSE
56650		FALSE
56700		FALSE
56750		FALSE
56800		FALSE
56850		FALSE
56900		FALSE
56950		FALSE
57000		FALSE
57050		FALSE
57100		FALSE
57150		FALSE
57200		FALSE
57250		FALSE
57300		FALSE
57350		FALSE
57400		FALSE
57450		FALSE
57500		FALSE
57550		FALSE
57600		FALSE
57650		FALSE
57700		FALSE
57750		FALSE
57800		FALSE
57850		FALSE
57900		FALSE
57950		FALSE
58000		FALSE
58050		FALSE
58100		FALSE
58150		FALSE
58200		FALSE
58250		FALSE
58300		FALSE
58350		FALSE
58400		FALSE
58450		FALSE
58500		FALSE
58550		FALSE
58600		FALSE
58650		FALSE
58700		FALSE
58750		FALSE
58800		FALSE
58850		FALSE
58900		FALSE
58950		FALSE
59000		FALSE
59050		FALSE
59100		FALSE
59150		FALSE
59200		FALSE
59250		FALSE
59300		FALSE
59350		FALSE
59400		FALSE
59450		FALSE
59500		FALSE
59550		FALSE
59600		FALSE
59650		FALSE
59700		FALSE
59750		FALSE
59800		FALSE
59850		FALSE
59900		FALSE
59950		FALSE
60000		FALSE

## Sheet: Dust
Calculations
Age	Dust Index	Dust rel. %	Dust-Index		Dust Max	0
0		#DIV/0!	FALSE		Dust Min.	0
50		#DIV/0!	FALSE		1	0
100		#DIV/0!	FALSE		0.66	0
150		#DIV/0!	FALSE		0.33	0
200		#DIV/0!	FALSE		0	0
250		#DIV/0!	FALSE
300		#DIV/0!	FALSE
350		#DIV/0!	FALSE
400		#DIV/0!	FALSE
450		#DIV/0!	FALSE
500		#DIV/0!	FALSE
550		#DIV/0!	FALSE
600		#DIV/0!	FALSE
650		#DIV/0!	FALSE
700		#DIV/0!	FALSE
750		#DIV/0!	FALSE
800		#DIV/0!	FALSE
850		#DIV/0!	FALSE
900		#DIV/0!	FALSE
950		#DIV/0!	FALSE
1000		#DIV/0!	FALSE
1050		#DIV/0!	FALSE
1100		#DIV/0!	FALSE
1150		#DIV/0!	FALSE
1200		#DIV/0!	FALSE
1250		#DIV/0!	FALSE
1300		#DIV/0!	FALSE
1350		#DIV/0!	FALSE
1400		#DIV/0!	FALSE
1450		#DIV/0!	FALSE
1500		#DIV/0!	FALSE
1550		#DIV/0!	FALSE
1600		#DIV/0!	FALSE
1650		#DIV/0!	FALSE
1700		#DIV/0!	FALSE
1750		#DIV/0!	FALSE
1800		#DIV/0!	FALSE
1850		#DIV/0!	FALSE
1900		#DIV/0!	FALSE
1950		#DIV/0!	FALSE
2000		#DIV/0!	FALSE
2050		#DIV/0!	FALSE
2100		#DIV/0!	FALSE
2150		#DIV/0!	FALSE
2200		#DIV/0!	FALSE
2250		#DIV/0!	FALSE
2300		#DIV/0!	FALSE
2350		#DIV/0!	FALSE
2400		#DIV/0!	FALSE
2450		#DIV/0!	FALSE
2500		#DIV/0!	FALSE
2550		#DIV/0!	FALSE
2600		#DIV/0!	FALSE
2650		#DIV/0!	FALSE
2700		#DIV/0!	FALSE
2750		#DIV/0!	FALSE
2800		#DIV/0!	FALSE
2850		#DIV/0!	FALSE
2900		#DIV/0!	FALSE
2950		#DIV/0!	FALSE
3000		#DIV/0!	FALSE
3050		#DIV/0!	FALSE
3100		#DIV/0!	FALSE
3150		#DIV/0!	FALSE
3200		#DIV/0!	FALSE
3250		#DIV/0!	FALSE
3300		#DIV/0!	FALSE
3350		#DIV/0!	FALSE
3400		#DIV/0!	FALSE
3450		#DIV/0!	FALSE
3500		#DIV/0!	FALSE
3550		#DIV/0!	FALSE
3600		#DIV/0!	FALSE
3650		#DIV/0!	FALSE
3700		#DIV/0!	FALSE
3750		#DIV/0!	FALSE
3800		#DIV/0!	FALSE
3850		#DIV/0!	FALSE
3900		#DIV/0!	FALSE
3950		#DIV/0!	FALSE
4000		#DIV/0!	FALSE
4050		#DIV/0!	FALSE
4100		#DIV/0!	FALSE
4150		#DIV/0!	FALSE
4200		#DIV/0!	FALSE
4250		#DIV/0!	FALSE
4300		#DIV/0!	FALSE
4350		#DIV/0!	FALSE
4400		#DIV/0!	FALSE
4450		#DIV/0!	FALSE
4500		#DIV/0!	FALSE
4550		#DIV/0!	FALSE
4600		#DIV/0!	FALSE
4650		#DIV/0!	FALSE
4700		#DIV/0!	FALSE
4750		#DIV/0!	FALSE
4800		#DIV/0!	FALSE
4850		#DIV/0!	FALSE
4900		#DIV/0!	FALSE
4950		#DIV/0!	FALSE
5000		#DIV/0!	FALSE
5050		#DIV/0!	FALSE
5100		#DIV/0!	FALSE
5150		#DIV/0!	FALSE
5200		#DIV/0!	FALSE
5250		#DIV/0!	FALSE
5300		#DIV/0!	FALSE
5350		#DIV/0!	FALSE
5400		#DIV/0!	FALSE
5450		#DIV/0!	FALSE
5500		#DIV/0!	FALSE
5550		#DIV/0!	FALSE
5600		#DIV/0!	FALSE
5650		#DIV/0!	FALSE
5700		#DIV/0!	FALSE
5750		#DIV/0!	FALSE
5800		#DIV/0!	FALSE
5850		#DIV/0!	FALSE
5900		#DIV/0!	FALSE
5950		#DIV/0!	FALSE
6000		#DIV/0!	FALSE
6050		#DIV/0!	FALSE
6100		#DIV/0!	FALSE
6150		#DIV/0!	FALSE
6200		#DIV/0!	FALSE
6250		#DIV/0!	FALSE
6300		#DIV/0!	FALSE
6350		#DIV/0!	FALSE
6400		#DIV/0!	FALSE
6450		#DIV/0!	FALSE
6500		#DIV/0!	FALSE
6550		#DIV/0!	FALSE
6600		#DIV/0!	FALSE
6650		#DIV/0!	FALSE
6700		#DIV/0!	FALSE
6750		#DIV/0!	FALSE
6800		#DIV/0!	FALSE
6850		#DIV/0!	FALSE
6900		#DIV/0!	FALSE
6950		#DIV/0!	FALSE
7000		#DIV/0!	FALSE
7050		#DIV/0!	FALSE
7100		#DIV/0!	FALSE
7150		#DIV/0!	FALSE
7200		#DIV/0!	FALSE
7250		#DIV/0!	FALSE
7300		#DIV/0!	FALSE
7350		#DIV/0!	FALSE
7400		#DIV/0!	FALSE
7450		#DIV/0!	FALSE
7500		#DIV/0!	FALSE
7550		#DIV/0!	FALSE
7600		#DIV/0!	FALSE
7650		#DIV/0!	FALSE
7700		#DIV/0!	FALSE
7750		#DIV/0!	FALSE
7800		#DIV/0!	FALSE
7850		#DIV/0!	FALSE
7900		#DIV/0!	FALSE
7950		#DIV/0!	FALSE
8000		#DIV/0!	FALSE
8050		#DIV/0!	FALSE
8100		#DIV/0!	FALSE
8150		#DIV/0!	FALSE
8200		#DIV/0!	FALSE
8250		#DIV/0!	FALSE
8300		#DIV/0!	FALSE
8350		#DIV/0!	FALSE
8400		#DIV/0!	FALSE
8450		#DIV/0!	FALSE
8500		#DIV/0!	FALSE
8550		#DIV/0!	FALSE
8600		#DIV/0!	FALSE
8650		#DIV/0!	FALSE
8700		#DIV/0!	FALSE
8750		#DIV/0!	FALSE
8800		#DIV/0!	FALSE
8850		#DIV/0!	FALSE
8900		#DIV/0!	FALSE
8950		#DIV/0!	FALSE
9000		#DIV/0!	FALSE
9050		#DIV/0!	FALSE
9100		#DIV/0!	FALSE
9150		#DIV/0!	FALSE
9200		#DIV/0!	FALSE
9250		#DIV/0!	FALSE
9300		#DIV/0!	FALSE
9350		#DIV/0!	FALSE
9400		#DIV/0!	FALSE
9450		#DIV/0!	FALSE
9500		#DIV/0!	FALSE
9550		#DIV/0!	FALSE
9600		#DIV/0!	FALSE
9650		#DIV/0!	FALSE
9700		#DIV/0!	FALSE
9750		#DIV/0!	FALSE
9800		#DIV/0!	FALSE
9850		#DIV/0!	FALSE
9900		#DIV/0!	FALSE
9950		#DIV/0!	FALSE
10000		#DIV/0!	FALSE
10050		#DIV/0!	FALSE
10100		#DIV/0!	FALSE
10150		#DIV/0!	FALSE
10200		#DIV/0!	FALSE
10250		#DIV/0!	FALSE
10300		#DIV/0!	FALSE
10350		#DIV/0!	FALSE
10400		#DIV/0!	FALSE
10450		#DIV/0!	FALSE
10500		#DIV/0!	FALSE
10550		#DIV/0!	FALSE
10600		#DIV/0!	FALSE
10650		#DIV/0!	FALSE
10700		#DIV/0!	FALSE
10750		#DIV/0!	FALSE
10800		#DIV/0!	FALSE
10850		#DIV/0!	FALSE
10900		#DIV/0!	FALSE
10950		#DIV/0!	FALSE
11000		#DIV/0!	FALSE
11050		#DIV/0!	FALSE
11100		#DIV/0!	FALSE
11150		#DIV/0!	FALSE
11200		#DIV/0!	FALSE
11250		#DIV/0!	FALSE
11300		#DIV/0!	FALSE
11350		#DIV/0!	FALSE
11400		#DIV/0!	FALSE
11450		#DIV/0!	FALSE
11500		#DIV/0!	FALSE
11550		#DIV/0!	FALSE
11600		#DIV/0!	FALSE
11650		#DIV/0!	FALSE
11700		#DIV/0!	FALSE
11750		#DIV/0!	FALSE
11800		#DIV/0!	FALSE
11850		#DIV/0!	FALSE
11900		#DIV/0!	FALSE
11950		#DIV/0!	FALSE
12000		#DIV/0!	FALSE
12050		#DIV/0!	FALSE
12100		#DIV/0!	FALSE
12150		#DIV/0!	FALSE
12200		#DIV/0!	FALSE
12250		#DIV/0!	FALSE
12300		#DIV/0!	FALSE
12350		#DIV/0!	FALSE
12400		#DIV/0!	FALSE
12450		#DIV/0!	FALSE
12500		#DIV/0!	FALSE
12550		#DIV/0!	FALSE
12600		#DIV/0!	FALSE
12650		#DIV/0!	FALSE
12700		#DIV/0!	FALSE
12750		#DIV/0!	FALSE
12800		#DIV/0!	FALSE
12850		#DIV/0!	FALSE
12900		#DIV/0!	FALSE
12950		#DIV/0!	FALSE
13000		#DIV/0!	FALSE
13050		#DIV/0!	FALSE
13100		#DIV/0!	FALSE
13150		#DIV/0!	FALSE
13200		#DIV/0!	FALSE
13250		#DIV/0!	FALSE
13300		#DIV/0!	FALSE
13350		#DIV/0!	FALSE
13400		#DIV/0!	FALSE
13450		#DIV/0!	FALSE
13500		#DIV/0!	FALSE
13550		#DIV/0!	FALSE
13600		#DIV/0!	FALSE
13650		#DIV/0!	FALSE
13700		#DIV/0!	FALSE
13750		#DIV/0!	FALSE
13800		#DIV/0!	FALSE
13850		#DIV/0!	FALSE
13900		#DIV/0!	FALSE
13950		#DIV/0!	FALSE
14000		#DIV/0!	FALSE
14050		#DIV/0!	FALSE
14100		#DIV/0!	FALSE
14150		#DIV/0!	FALSE
14200		#DIV/0!	FALSE
14250		#DIV/0!	FALSE
14300		#DIV/0!	FALSE
14350		#DIV/0!	FALSE
14400		#DIV/0!	FALSE
14450		#DIV/0!	FALSE
14500		#DIV/0!	FALSE
14550		#DIV/0!	FALSE
14600		#DIV/0!	FALSE
14650		#DIV/0!	FALSE
14700		#DIV/0!	FALSE
14750		#DIV/0!	FALSE
14800		#DIV/0!	FALSE
14850		#DIV/0!	FALSE
14900		#DIV/0!	FALSE
14950		#DIV/0!	FALSE
15000		#DIV/0!	FALSE
15050		#DIV/0!	FALSE
15100		#DIV/0!	FALSE
15150		#DIV/0!	FALSE
15200		#DIV/0!	FALSE
15250		#DIV/0!	FALSE
15300		#DIV/0!	FALSE
15350		#DIV/0!	FALSE
15400		#DIV/0!	FALSE
15450		#DIV/0!	FALSE
15500		#DIV/0!	FALSE
15550		#DIV/0!	FALSE
15600		#DIV/0!	FALSE
15650		#DIV/0!	FALSE
15700		#DIV/0!	FALSE
15750		#DIV/0!	FALSE
15800		#DIV/0!	FALSE
15850		#DIV/0!	FALSE
15900		#DIV/0!	FALSE
15950		#DIV/0!	FALSE
16000		#DIV/0!	FALSE
16050		#DIV/0!	FALSE
16100		#DIV/0!	FALSE
16150		#DIV/0!	FALSE
16200		#DIV/0!	FALSE
16250		#DIV/0!	FALSE
16300		#DIV/0!	FALSE
16350		#DIV/0!	FALSE
16400		#DIV/0!	FALSE
16450		#DIV/0!	FALSE
16500		#DIV/0!	FALSE
16550		#DIV/0!	FALSE
16600		#DIV/0!	FALSE
16650		#DIV/0!	FALSE
16700		#DIV/0!	FALSE
16750		#DIV/0!	FALSE
16800		#DIV/0!	FALSE
16850		#DIV/0!	FALSE
16900		#DIV/0!	FALSE
16950		#DIV/0!	FALSE
17000		#DIV/0!	FALSE
17050		#DIV/0!	FALSE
17100		#DIV/0!	FALSE
17150		#DIV/0!	FALSE
17200		#DIV/0!	FALSE
17250		#DIV/0!	FALSE
17300		#DIV/0!	FALSE
17350		#DIV/0!	FALSE
17400		#DIV/0!	FALSE
17450		#DIV/0!	FALSE
17500		#DIV/0!	FALSE
17550		#DIV/0!	FALSE
17600		#DIV/0!	FALSE
17650		#DIV/0!	FALSE
17700		#DIV/0!	FALSE
17750		#DIV/0!	FALSE
17800		#DIV/0!	FALSE
17850		#DIV/0!	FALSE
17900		#DIV/0!	FALSE
17950		#DIV/0!	FALSE
18000		#DIV/0!	FALSE
18050		#DIV/0!	FALSE
18100		#DIV/0!	FALSE
18150		#DIV/0!	FALSE
18200		#DIV/0!	FALSE
18250		#DIV/0!	FALSE
18300		#DIV/0!	FALSE
18350		#DIV/0!	FALSE
18400		#DIV/0!	FALSE
18450		#DIV/0!	FALSE
18500		#DIV/0!	FALSE
18550		#DIV/0!	FALSE
18600		#DIV/0!	FALSE
18650		#DIV/0!	FALSE
18700		#DIV/0!	FALSE
18750		#DIV/0!	FALSE
18800		#DIV/0!	FALSE
18850		#DIV/0!	FALSE
18900		#DIV/0!	FALSE
18950		#DIV/0!	FALSE
19000		#DIV/0!	FALSE
19050		#DIV/0!	FALSE
19100		#DIV/0!	FALSE
19150		#DIV/0!	FALSE
19200		#DIV/0!	FALSE
19250		#DIV/0!	FALSE
19300		#DIV/0!	FALSE
19350		#DIV/0!	FALSE
19400		#DIV/0!	FALSE
19450		#DIV/0!	FALSE
19500		#DIV/0!	FALSE
19550		#DIV/0!	FALSE
19600		#DIV/0!	FALSE
19650		#DIV/0!	FALSE
19700		#DIV/0!	FALSE
19750		#DIV/0!	FALSE
19800		#DIV/0!	FALSE
19850		#DIV/0!	FALSE
19900		#DIV/0!	FALSE
19950		#DIV/0!	FALSE
20000		#DIV/0!	FALSE
20050		#DIV/0!	FALSE
20100		#DIV/0!	FALSE
20150		#DIV/0!	FALSE
20200		#DIV/0!	FALSE
20250		#DIV/0!	FALSE
20300		#DIV/0!	FALSE
20350		#DIV/0!	FALSE
20400		#DIV/0!	FALSE
20450		#DIV/0!	FALSE
20500		#DIV/0!	FALSE
20550		#DIV/0!	FALSE
20600		#DIV/0!	FALSE
20650		#DIV/0!	FALSE
20700		#DIV/0!	FALSE
20750		#DIV/0!	FALSE
20800		#DIV/0!	FALSE
20850		#DIV/0!	FALSE
20900		#DIV/0!	FALSE
20950		#DIV/0!	FALSE
21000		#DIV/0!	FALSE
21050		#DIV/0!	FALSE
21100		#DIV/0!	FALSE
21150		#DIV/0!	FALSE
21200		#DIV/0!	FALSE
21250		#DIV/0!	FALSE
21300		#DIV/0!	FALSE
21350		#DIV/0!	FALSE
21400		#DIV/0!	FALSE
21450		#DIV/0!	FALSE
21500		#DIV/0!	FALSE
21550		#DIV/0!	FALSE
21600		#DIV/0!	FALSE
21650		#DIV/0!	FALSE
21700		#DIV/0!	FALSE
21750		#DIV/0!	FALSE
21800		#DIV/0!	FALSE
21850		#DIV/0!	FALSE
21900		#DIV/0!	FALSE
21950		#DIV/0!	FALSE
22000		#DIV/0!	FALSE
22050		#DIV/0!	FALSE
22100		#DIV/0!	FALSE
22150		#DIV/0!	FALSE
22200		#DIV/0!	FALSE
22250		#DIV/0!	FALSE
22300		#DIV/0!	FALSE
22350		#DIV/0!	FALSE
22400		#DIV/0!	FALSE
22450		#DIV/0!	FALSE
22500		#DIV/0!	FALSE
22550		#DIV/0!	FALSE
22600		#DIV/0!	FALSE
22650		#DIV/0!	FALSE
22700		#DIV/0!	FALSE
22750		#DIV/0!	FALSE
22800		#DIV/0!	FALSE
22850		#DIV/0!	FALSE
22900		#DIV/0!	FALSE
22950		#DIV/0!	FALSE
23000		#DIV/0!	FALSE
23050		#DIV/0!	FALSE
23100		#DIV/0!	FALSE
23150		#DIV/0!	FALSE
23200		#DIV/0!	FALSE
23250		#DIV/0!	FALSE
23300		#DIV/0!	FALSE
23350		#DIV/0!	FALSE
23400		#DIV/0!	FALSE
23450		#DIV/0!	FALSE
23500		#DIV/0!	FALSE
23550		#DIV/0!	FALSE
23600		#DIV/0!	FALSE
23650		#DIV/0!	FALSE
23700		#DIV/0!	FALSE
23750		#DIV/0!	FALSE
23800		#DIV/0!	FALSE
23850		#DIV/0!	FALSE
23900		#DIV/0!	FALSE
23950		#DIV/0!	FALSE
24000		#DIV/0!	FALSE
24050		#DIV/0!	FALSE
24100		#DIV/0!	FALSE
24150		#DIV/0!	FALSE
24200		#DIV/0!	FALSE
24250		#DIV/0!	FALSE
24300		#DIV/0!	FALSE
24350		#DIV/0!	FALSE
24400		#DIV/0!	FALSE
24450		#DIV/0!	FALSE
24500		#DIV/0!	FALSE
24550		#DIV/0!	FALSE
24600		#DIV/0!	FALSE
24650		#DIV/0!	FALSE
24700		#DIV/0!	FALSE
24750		#DIV/0!	FALSE
24800		#DIV/0!	FALSE
24850		#DIV/0!	FALSE
24900		#DIV/0!	FALSE
24950		#DIV/0!	FALSE
25000		#DIV/0!	FALSE
25050		#DIV/0!	FALSE
25100		#DIV/0!	FALSE
25150		#DIV/0!	FALSE
25200		#DIV/0!	FALSE
25250		#DIV/0!	FALSE
25300		#DIV/0!	FALSE
25350		#DIV/0!	FALSE
25400		#DIV/0!	FALSE
25450		#DIV/0!	FALSE
25500		#DIV/0!	FALSE
25550		#DIV/0!	FALSE
25600		#DIV/0!	FALSE
25650		#DIV/0!	FALSE
25700		#DIV/0!	FALSE
25750		#DIV/0!	FALSE
25800		#DIV/0!	FALSE
25850		#DIV/0!	FALSE
25900		#DIV/0!	FALSE
25950		#DIV/0!	FALSE
26000		#DIV/0!	FALSE
26050		#DIV/0!	FALSE
26100		#DIV/0!	FALSE
26150		#DIV/0!	FALSE
26200		#DIV/0!	FALSE
26250		#DIV/0!	FALSE
26300		#DIV/0!	FALSE
26350		#DIV/0!	FALSE
26400		#DIV/0!	FALSE
26450		#DIV/0!	FALSE
26500		#DIV/0!	FALSE
26550		#DIV/0!	FALSE
26600		#DIV/0!	FALSE
26650		#DIV/0!	FALSE
26700		#DIV/0!	FALSE
26750		#DIV/0!	FALSE
26800		#DIV/0!	FALSE
26850		#DIV/0!	FALSE
26900		#DIV/0!	FALSE
26950		#DIV/0!	FALSE
27000		#DIV/0!	FALSE
27050		#DIV/0!	FALSE
27100		#DIV/0!	FALSE
27150		#DIV/0!	FALSE
27200		#DIV/0!	FALSE
27250		#DIV/0!	FALSE
27300		#DIV/0!	FALSE
27350		#DIV/0!	FALSE
27400		#DIV/0!	FALSE
27450		#DIV/0!	FALSE
27500		#DIV/0!	FALSE
27550		#DIV/0!	FALSE
27600		#DIV/0!	FALSE
27650		#DIV/0!	FALSE
27700		#DIV/0!	FALSE
27750		#DIV/0!	FALSE
27800		#DIV/0!	FALSE
27850		#DIV/0!	FALSE
27900		#DIV/0!	FALSE
27950		#DIV/0!	FALSE
28000		#DIV/0!	FALSE
28050		#DIV/0!	FALSE
28100		#DIV/0!	FALSE
28150		#DIV/0!	FALSE
28200		#DIV/0!	FALSE
28250		#DIV/0!	FALSE
28300		#DIV/0!	FALSE
28350		#DIV/0!	FALSE
28400		#DIV/0!	FALSE
28450		#DIV/0!	FALSE
28500		#DIV/0!	FALSE
28550		#DIV/0!	FALSE
28600		#DIV/0!	FALSE
28650		#DIV/0!	FALSE
28700		#DIV/0!	FALSE
28750		#DIV/0!	FALSE
28800		#DIV/0!	FALSE
28850		#DIV/0!	FALSE
28900		#DIV/0!	FALSE
28950		#DIV/0!	FALSE
29000		#DIV/0!	FALSE
29050		#DIV/0!	FALSE
29100		#DIV/0!	FALSE
29150		#DIV/0!	FALSE
29200		#DIV/0!	FALSE
29250		#DIV/0!	FALSE
29300		#DIV/0!	FALSE
29350		#DIV/0!	FALSE
29400		#DIV/0!	FALSE
29450		#DIV/0!	FALSE
29500		#DIV/0!	FALSE
29550		#DIV/0!	FALSE
29600		#DIV/0!	FALSE
29650		#DIV/0!	FALSE
29700		#DIV/0!	FALSE
29750		#DIV/0!	FALSE
29800		#DIV/0!	FALSE
29850		#DIV/0!	FALSE
29900		#DIV/0!	FALSE
29950		#DIV/0!	FALSE
30000		#DIV/0!	FALSE
30050		#DIV/0!	FALSE
30100		#DIV/0!	FALSE
30150		#DIV/0!	FALSE
30200		#DIV/0!	FALSE
30250		#DIV/0!	FALSE
30300		#DIV/0!	FALSE
30350		#DIV/0!	FALSE
30400		#DIV/0!	FALSE
30450		#DIV/0!	FALSE
30500		#DIV/0!	FALSE
30550		#DIV/0!	FALSE
30600		#DIV/0!	FALSE
30650		#DIV/0!	FALSE
30700		#DIV/0!	FALSE
30750		#DIV/0!	FALSE
30800		#DIV/0!	FALSE
30850		#DIV/0!	FALSE
30900		#DIV/0!	FALSE
30950		#DIV/0!	FALSE
31000		#DIV/0!	FALSE
31050		#DIV/0!	FALSE
31100		#DIV/0!	FALSE
31150		#DIV/0!	FALSE
31200		#DIV/0!	FALSE
31250		#DIV/0!	FALSE
31300		#DIV/0!	FALSE
31350		#DIV/0!	FALSE
31400		#DIV/0!	FALSE
31450		#DIV/0!	FALSE
31500		#DIV/0!	FALSE
31550		#DIV/0!	FALSE
31600		#DIV/0!	FALSE
31650		#DIV/0!	FALSE
31700		#DIV/0!	FALSE
31750		#DIV/0!	FALSE
31800		#DIV/0!	FALSE
31850		#DIV/0!	FALSE
31900		#DIV/0!	FALSE
31950		#DIV/0!	FALSE
32000		#DIV/0!	FALSE
32050		#DIV/0!	FALSE
32100		#DIV/0!	FALSE
32150		#DIV/0!	FALSE
32200		#DIV/0!	FALSE
32250		#DIV/0!	FALSE
32300		#DIV/0!	FALSE
32350		#DIV/0!	FALSE
32400		#DIV/0!	FALSE
32450		#DIV/0!	FALSE
32500		#DIV/0!	FALSE
32550		#DIV/0!	FALSE
32600		#DIV/0!	FALSE
32650		#DIV/0!	FALSE
32700		#DIV/0!	FALSE
32750		#DIV/0!	FALSE
32800		#DIV/0!	FALSE
32850		#DIV/0!	FALSE
32900		#DIV/0!	FALSE
32950		#DIV/0!	FALSE
33000		#DIV/0!	FALSE
33050		#DIV/0!	FALSE
33100		#DIV/0!	FALSE
33150		#DIV/0!	FALSE
33200		#DIV/0!	FALSE
33250		#DIV/0!	FALSE
33300		#DIV/0!	FALSE
33350		#DIV/0!	FALSE
33400		#DIV/0!	FALSE
33450		#DIV/0!	FALSE
33500		#DIV/0!	FALSE
33550		#DIV/0!	FALSE
33600		#DIV/0!	FALSE
33650		#DIV/0!	FALSE
33700		#DIV/0!	FALSE
33750		#DIV/0!	FALSE
33800		#DIV/0!	FALSE
33850		#DIV/0!	FALSE
33900		#DIV/0!	FALSE
33950		#DIV/0!	FALSE
34000		#DIV/0!	FALSE
34050		#DIV/0!	FALSE
34100		#DIV/0!	FALSE
34150		#DIV/0!	FALSE
34200		#DIV/0!	FALSE
34250		#DIV/0!	FALSE
34300		#DIV/0!	FALSE
34350		#DIV/0!	FALSE
34400		#DIV/0!	FALSE
34450		#DIV/0!	FALSE
34500		#DIV/0!	FALSE
34550		#DIV/0!	FALSE
34600		#DIV/0!	FALSE
34650		#DIV/0!	FALSE
34700		#DIV/0!	FALSE
34750		#DIV/0!	FALSE
34800		#DIV/0!	FALSE
34850		#DIV/0!	FALSE
34900		#DIV/0!	FALSE
34950		#DIV/0!	FALSE
35000		#DIV/0!	FALSE
35050		#DIV/0!	FALSE
35100		#DIV/0!	FALSE
35150		#DIV/0!	FALSE
35200		#DIV/0!	FALSE
35250		#DIV/0!	FALSE
35300		#DIV/0!	FALSE
35350		#DIV/0!	FALSE
35400		#DIV/0!	FALSE
35450		#DIV/0!	FALSE
35500		#DIV/0!	FALSE
35550		#DIV/0!	FALSE
35600		#DIV/0!	FALSE
35650		#DIV/0!	FALSE
35700		#DIV/0!	FALSE
35750		#DIV/0!	FALSE
35800		#DIV/0!	FALSE
35850		#DIV/0!	FALSE
35900		#DIV/0!	FALSE
35950		#DIV/0!	FALSE
36000		#DIV/0!	FALSE
36050		#DIV/0!	FALSE
36100		#DIV/0!	FALSE
36150		#DIV/0!	FALSE
36200		#DIV/0!	FALSE
36250		#DIV/0!	FALSE
36300		#DIV/0!	FALSE
36350		#DIV/0!	FALSE
36400		#DIV/0!	FALSE
36450		#DIV/0!	FALSE
36500		#DIV/0!	FALSE
36550		#DIV/0!	FALSE
36600		#DIV/0!	FALSE
36650		#DIV/0!	FALSE
36700		#DIV/0!	FALSE
36750		#DIV/0!	FALSE
36800		#DIV/0!	FALSE
36850		#DIV/0!	FALSE
36900		#DIV/0!	FALSE
36950		#DIV/0!	FALSE
37000		#DIV/0!	FALSE
37050		#DIV/0!	FALSE
37100		#DIV/0!	FALSE
37150		#DIV/0!	FALSE
37200		#DIV/0!	FALSE
37250		#DIV/0!	FALSE
37300		#DIV/0!	FALSE
37350		#DIV/0!	FALSE
37400		#DIV/0!	FALSE
37450		#DIV/0!	FALSE
37500		#DIV/0!	FALSE
37550		#DIV/0!	FALSE
37600		#DIV/0!	FALSE
37650		#DIV/0!	FALSE
37700		#DIV/0!	FALSE
37750		#DIV/0!	FALSE
37800		#DIV/0!	FALSE
37850		#DIV/0!	FALSE
37900		#DIV/0!	FALSE
37950		#DIV/0!	FALSE
38000		#DIV/0!	FALSE
38050		#DIV/0!	FALSE
38100		#DIV/0!	FALSE
38150		#DIV/0!	FALSE
38200		#DIV/0!	FALSE
38250		#DIV/0!	FALSE
38300		#DIV/0!	FALSE
38350		#DIV/0!	FALSE
38400		#DIV/0!	FALSE
38450		#DIV/0!	FALSE
38500		#DIV/0!	FALSE
38550		#DIV/0!	FALSE
38600		#DIV/0!	FALSE
38650		#DIV/0!	FALSE
38700		#DIV/0!	FALSE
38750		#DIV/0!	FALSE
38800		#DIV/0!	FALSE
38850		#DIV/0!	FALSE
38900		#DIV/0!	FALSE
38950		#DIV/0!	FALSE
39000		#DIV/0!	FALSE
39050		#DIV/0!	FALSE
39100		#DIV/0!	FALSE
39150		#DIV/0!	FALSE
39200		#DIV/0!	FALSE
39250		#DIV/0!	FALSE
39300		#DIV/0!	FALSE
39350		#DIV/0!	FALSE
39400		#DIV/0!	FALSE
39450		#DIV/0!	FALSE
39500		#DIV/0!	FALSE
39550		#DIV/0!	FALSE
39600		#DIV/0!	FALSE
39650		#DIV/0!	FALSE
39700		#DIV/0!	FALSE
39750		#DIV/0!	FALSE
39800		#DIV/0!	FALSE
39850		#DIV/0!	FALSE
39900		#DIV/0!	FALSE
39950		#DIV/0!	FALSE
40000		#DIV/0!	FALSE
40050		#DIV/0!	FALSE
40100		#DIV/0!	FALSE
40150		#DIV/0!	FALSE
40200		#DIV/0!	FALSE
40250		#DIV/0!	FALSE
40300		#DIV/0!	FALSE
40350		#DIV/0!	FALSE
40400		#DIV/0!	FALSE
40450		#DIV/0!	FALSE
40500		#DIV/0!	FALSE
40550		#DIV/0!	FALSE
40600		#DIV/0!	FALSE
40650		#DIV/0!	FALSE
40700		#DIV/0!	FALSE
40750		#DIV/0!	FALSE
40800		#DIV/0!	FALSE
40850		#DIV/0!	FALSE
40900		#DIV/0!	FALSE
40950		#DIV/0!	FALSE
41000		#DIV/0!	FALSE
41050		#DIV/0!	FALSE
41100		#DIV/0!	FALSE
41150		#DIV/0!	FALSE
41200		#DIV/0!	FALSE
41250		#DIV/0!	FALSE
41300		#DIV/0!	FALSE
41350		#DIV/0!	FALSE
41400		#DIV/0!	FALSE
41450		#DIV/0!	FALSE
41500		#DIV/0!	FALSE
41550		#DIV/0!	FALSE
41600		#DIV/0!	FALSE
41650		#DIV/0!	FALSE
41700		#DIV/0!	FALSE
41750		#DIV/0!	FALSE
41800		#DIV/0!	FALSE
41850		#DIV/0!	FALSE
41900		#DIV/0!	FALSE
41950		#DIV/0!	FALSE
42000		#DIV/0!	FALSE
42050		#DIV/0!	FALSE
42100		#DIV/0!	FALSE
42150		#DIV/0!	FALSE
42200		#DIV/0!	FALSE
42250		#DIV/0!	FALSE
42300		#DIV/0!	FALSE
42350		#DIV/0!	FALSE
42400		#DIV/0!	FALSE
42450		#DIV/0!	FALSE
42500		#DIV/0!	FALSE
42550		#DIV/0!	FALSE
42600		#DIV/0!	FALSE
42650		#DIV/0!	FALSE
42700		#DIV/0!	FALSE
42750		#DIV/0!	FALSE
42800		#DIV/0!	FALSE
42850		#DIV/0!	FALSE
42900		#DIV/0!	FALSE
42950		#DIV/0!	FALSE
43000		#DIV/0!	FALSE
43050		#DIV/0!	FALSE
43100		#DIV/0!	FALSE
43150		#DIV/0!	FALSE
43200		#DIV/0!	FALSE
43250		#DIV/0!	FALSE
43300		#DIV/0!	FALSE
43350		#DIV/0!	FALSE
43400		#DIV/0!	FALSE
43450		#DIV/0!	FALSE
43500		#DIV/0!	FALSE
43550		#DIV/0!	FALSE
43600		#DIV/0!	FALSE
43650		#DIV/0!	FALSE
43700		#DIV/0!	FALSE
43750		#DIV/0!	FALSE
43800		#DIV/0!	FALSE
43850		#DIV/0!	FALSE
43900		#DIV/0!	FALSE
43950		#DIV/0!	FALSE
44000		#DIV/0!	FALSE
44050		#DIV/0!	FALSE
44100		#DIV/0!	FALSE
44150		#DIV/0!	FALSE
44200		#DIV/0!	FALSE
44250		#DIV/0!	FALSE
44300		#DIV/0!	FALSE
44350		#DIV/0!	FALSE
44400		#DIV/0!	FALSE
44450		#DIV/0!	FALSE
44500		#DIV/0!	FALSE
44550		#DIV/0!	FALSE
44600		#DIV/0!	FALSE
44650		#DIV/0!	FALSE
44700		#DIV/0!	FALSE
44750		#DIV/0!	FALSE
44800		#DIV/0!	FALSE
44850		#DIV/0!	FALSE
44900		#DIV/0!	FALSE
44950		#DIV/0!	FALSE
45000		#DIV/0!	FALSE
45050		#DIV/0!	FALSE
45100		#DIV/0!	FALSE
45150		#DIV/0!	FALSE
45200		#DIV/0!	FALSE
45250		#DIV/0!	FALSE
45300		#DIV/0!	FALSE
45350		#DIV/0!	FALSE
45400		#DIV/0!	FALSE
45450		#DIV/0!	FALSE
45500		#DIV/0!	FALSE
45550		#DIV/0!	FALSE
45600		#DIV/0!	FALSE
45650		#DIV/0!	FALSE
45700		#DIV/0!	FALSE
45750		#DIV/0!	FALSE
45800		#DIV/0!	FALSE
45850		#DIV/0!	FALSE
45900		#DIV/0!	FALSE
45950		#DIV/0!	FALSE
46000		#DIV/0!	FALSE
46050		#DIV/0!	FALSE
46100		#DIV/0!	FALSE
46150		#DIV/0!	FALSE
46200		#DIV/0!	FALSE
46250		#DIV/0!	FALSE
46300		#DIV/0!	FALSE
46350		#DIV/0!	FALSE
46400		#DIV/0!	FALSE
46450		#DIV/0!	FALSE
46500		#DIV/0!	FALSE
46550		#DIV/0!	FALSE
46600		#DIV/0!	FALSE
46650		#DIV/0!	FALSE
46700		#DIV/0!	FALSE
46750		#DIV/0!	FALSE
46800		#DIV/0!	FALSE
46850		#DIV/0!	FALSE
46900		#DIV/0!	FALSE
46950		#DIV/0!	FALSE
47000		#DIV/0!	FALSE
47050		#DIV/0!	FALSE
47100		#DIV/0!	FALSE
47150		#DIV/0!	FALSE
47200		#DIV/0!	FALSE
47250		#DIV/0!	FALSE
47300		#DIV/0!	FALSE
47350		#DIV/0!	FALSE
47400		#DIV/0!	FALSE
47450		#DIV/0!	FALSE
47500		#DIV/0!	FALSE
47550		#DIV/0!	FALSE
47600		#DIV/0!	FALSE
47650		#DIV/0!	FALSE
47700		#DIV/0!	FALSE
47750		#DIV/0!	FALSE
47800		#DIV/0!	FALSE
47850		#DIV/0!	FALSE
47900		#DIV/0!	FALSE
47950		#DIV/0!	FALSE
48000		#DIV/0!	FALSE
48050		#DIV/0!	FALSE
48100		#DIV/0!	FALSE
48150		#DIV/0!	FALSE
48200		#DIV/0!	FALSE
48250		#DIV/0!	FALSE
48300		#DIV/0!	FALSE
48350		#DIV/0!	FALSE
48400		#DIV/0!	FALSE
48450		#DIV/0!	FALSE
48500		#DIV/0!	FALSE
48550		#DIV/0!	FALSE
48600		#DIV/0!	FALSE
48650		#DIV/0!	FALSE
48700		#DIV/0!	FALSE
48750		#DIV/0!	FALSE
48800		#DIV/0!	FALSE
48850		#DIV/0!	FALSE
48900		#DIV/0!	FALSE
48950		#DIV/0!	FALSE
49000		#DIV/0!	FALSE
49050		#DIV/0!	FALSE
49100		#DIV/0!	FALSE
49150		#DIV/0!	FALSE
49200		#DIV/0!	FALSE
49250		#DIV/0!	FALSE
49300		#DIV/0!	FALSE
49350		#DIV/0!	FALSE
49400		#DIV/0!	FALSE
49450		#DIV/0!	FALSE
49500		#DIV/0!	FALSE
49550		#DIV/0!	FALSE
49600		#DIV/0!	FALSE
49650		#DIV/0!	FALSE
49700		#DIV/0!	FALSE
49750		#DIV/0!	FALSE
49800		#DIV/0!	FALSE
49850		#DIV/0!	FALSE
49900		#DIV/0!	FALSE
49950		#DIV/0!	FALSE
50000		#DIV/0!	FALSE
50050		#DIV/0!	FALSE
50100		#DIV/0!	FALSE
50150		#DIV/0!	FALSE
50200		#DIV/0!	FALSE
50250		#DIV/0!	FALSE
50300		#DIV/0!	FALSE
50350		#DIV/0!	FALSE
50400		#DIV/0!	FALSE
50450		#DIV/0!	FALSE
50500		#DIV/0!	FALSE
50550		#DIV/0!	FALSE
50600		#DIV/0!	FALSE
50650		#DIV/0!	FALSE
50700		#DIV/0!	FALSE
50750		#DIV/0!	FALSE
50800		#DIV/0!	FALSE
50850		#DIV/0!	FALSE
50900		#DIV/0!	FALSE
50950		#DIV/0!	FALSE
51000		#DIV/0!	FALSE
51050		#DIV/0!	FALSE
51100		#DIV/0!	FALSE
51150		#DIV/0!	FALSE
51200		#DIV/0!	FALSE
51250		#DIV/0!	FALSE
51300		#DIV/0!	FALSE
51350		#DIV/0!	FALSE
51400		#DIV/0!	FALSE
51450		#DIV/0!	FALSE
51500		#DIV/0!	FALSE
51550		#DIV/0!	FALSE
51600		#DIV/0!	FALSE
51650		#DIV/0!	FALSE
51700		#DIV/0!	FALSE
51750		#DIV/0!	FALSE
51800		#DIV/0!	FALSE
51850		#DIV/0!	FALSE
51900		#DIV/0!	FALSE
51950		#DIV/0!	FALSE
52000		#DIV/0!	FALSE
52050		#DIV/0!	FALSE
52100		#DIV/0!	FALSE
52150		#DIV/0!	FALSE
52200		#DIV/0!	FALSE
52250		#DIV/0!	FALSE
52300		#DIV/0!	FALSE
52350		#DIV/0!	FALSE
52400		#DIV/0!	FALSE
52450		#DIV/0!	FALSE
52500		#DIV/0!	FALSE
52550		#DIV/0!	FALSE
52600		#DIV/0!	FALSE
52650		#DIV/0!	FALSE
52700		#DIV/0!	FALSE
52750		#DIV/0!	FALSE
52800		#DIV/0!	FALSE
52850		#DIV/0!	FALSE
52900		#DIV/0!	FALSE
52950		#DIV/0!	FALSE
53000		#DIV/0!	FALSE
53050		#DIV/0!	FALSE
53100		#DIV/0!	FALSE
53150		#DIV/0!	FALSE
53200		#DIV/0!	FALSE
53250		#DIV/0!	FALSE
53300		#DIV/0!	FALSE
53350		#DIV/0!	FALSE
53400		#DIV/0!	FALSE
53450		#DIV/0!	FALSE
53500		#DIV/0!	FALSE
53550		#DIV/0!	FALSE
53600		#DIV/0!	FALSE
53650		#DIV/0!	FALSE
53700		#DIV/0!	FALSE
53750		#DIV/0!	FALSE
53800		#DIV/0!	FALSE
53850		#DIV/0!	FALSE
53900		#DIV/0!	FALSE
53950		#DIV/0!	FALSE
54000		#DIV/0!	FALSE
54050		#DIV/0!	FALSE
54100		#DIV/0!	FALSE
54150		#DIV/0!	FALSE
54200		#DIV/0!	FALSE
54250		#DIV/0!	FALSE
54300		#DIV/0!	FALSE
54350		#DIV/0!	FALSE
54400		#DIV/0!	FALSE
54450		#DIV/0!	FALSE
54500		#DIV/0!	FALSE
54550		#DIV/0!	FALSE
54600		#DIV/0!	FALSE
54650		#DIV/0!	FALSE
54700		#DIV/0!	FALSE
54750		#DIV/0!	FALSE
54800		#DIV/0!	FALSE
54850		#DIV/0!	FALSE
54900		#DIV/0!	FALSE
54950		#DIV/0!	FALSE
55000		#DIV/0!	FALSE
55050		#DIV/0!	FALSE
55100		#DIV/0!	FALSE
55150		#DIV/0!	FALSE
55200		#DIV/0!	FALSE
55250		#DIV/0!	FALSE
55300		#DIV/0!	FALSE
55350		#DIV/0!	FALSE
55400		#DIV/0!	FALSE
55450		#DIV/0!	FALSE
55500		#DIV/0!	FALSE
55550		#DIV/0!	FALSE
55600		#DIV/0!	FALSE
55650		#DIV/0!	FALSE
55700		#DIV/0!	FALSE
55750		#DIV/0!	FALSE
55800		#DIV/0!	FALSE
55850		#DIV/0!	FALSE
55900		#DIV/0!	FALSE
55950		#DIV/0!	FALSE
56000		#DIV/0!	FALSE
56050		#DIV/0!	FALSE
56100		#DIV/0!	FALSE
56150		#DIV/0!	FALSE
56200		#DIV/0!	FALSE
56250		#DIV/0!	FALSE
56300		#DIV/0!	FALSE
56350		#DIV/0!	FALSE
56400		#DIV/0!	FALSE
56450		#DIV/0!	FALSE
56500		#DIV/0!	FALSE
56550		#DIV/0!	FALSE
56600		#DIV/0!	FALSE
56650		#DIV/0!	FALSE
56700		#DIV/0!	FALSE
56750		#DIV/0!	FALSE
56800		#DIV/0!	FALSE
56850		#DIV/0!	FALSE
56900		#DIV/0!	FALSE
56950		#DIV/0!	FALSE
57000		#DIV/0!	FALSE
57050		#DIV/0!	FALSE
57100		#DIV/0!	FALSE
57150		#DIV/0!	FALSE
57200		#DIV/0!	FALSE
57250		#DIV/0!	FALSE
57300		#DIV/0!	FALSE
57350		#DIV/0!	FALSE
57400		#DIV/0!	FALSE
57450		#DIV/0!	FALSE
57500		#DIV/0!	FALSE
57550		#DIV/0!	FALSE
57600		#DIV/0!	FALSE
57650		#DIV/0!	FALSE
57700		#DIV/0!	FALSE
57750		#DIV/0!	FALSE
57800		#DIV/0!	FALSE
57850		#DIV/0!	FALSE
57900		#DIV/0!	FALSE
57950		#DIV/0!	FALSE
58000		#DIV/0!	FALSE
58050		#DIV/0!	FALSE
58100		#DIV/0!	FALSE
58150		#DIV/0!	FALSE
58200		#DIV/0!	FALSE
58250		#DIV/0!	FALSE
58300		#DIV/0!	FALSE
58350		#DIV/0!	FALSE
58400		#DIV/0!	FALSE
58450		#DIV/0!	FALSE
58500		#DIV/0!	FALSE
58550		#DIV/0!	FALSE
58600		#DIV/0!	FALSE
58650		#DIV/0!	FALSE
58700		#DIV/0!	FALSE
58750		#DIV/0!	FALSE
58800		#DIV/0!	FALSE
58850		#DIV/0!	FALSE
58900		#DIV/0!	FALSE
58950		#DIV/0!	FALSE
59000		#DIV/0!	FALSE
59050		#DIV/0!	FALSE
59100		#DIV/0!	FALSE
59150		#DIV/0!	FALSE
59200		#DIV/0!	FALSE
59250		#DIV/0!	FALSE
59300		#DIV/0!	FALSE
59350		#DIV/0!	FALSE
59400		#DIV/0!	FALSE
59450		#DIV/0!	FALSE
59500		#DIV/0!	FALSE
59550		#DIV/0!	FALSE
59600		#DIV/0!	FALSE
59650		#DIV/0!	FALSE
59700		#DIV/0!	FALSE
59750		#DIV/0!	FALSE
59800		#DIV/0!	FALSE
59850		#DIV/0!	FALSE
59900		#DIV/0!	FALSE
59950		#DIV/0!	FALSE
60000		#DIV/0!	FALSE
