# Supplementary material for: Aridity synthesis for eight selected key regions of the global climate system during the last 60 000 years
Source: Copernicus journal article supplement (doi:10.5194/cp-16-2221-2020), 2020-11-16
Supplement: Supplementary file 3 [file cp-16-2221-2020-supplement.zip › Supplement_aridity_index_Paper/STab_2.xlsx]

## Sheet: data1
	Central Europe		Arabian Sea		NW-Africa		China		Southern Europe		Portuguese margin		Mediterranean Sea		St. Barbara Basin
age [yr b2k]	aridity index	Error	Aridity Index	Error	Aridity Index	Error	Aridity Index	Error	Aridity Index	Error	Aridity Index	Error	Aridity Index	Error	Aridity Index	Error
0	0	0.48293	0	0.33121	0	0.44225	0	0.42369	0	0.38387	0	0.37238	0	0.42133	NAN	NAN
50	3	0.20239	0	0.33377	0	0.4447	0	0.41959	0	0.3866	0	0.37548	0	0.43439	NAN	NAN
100	4	0.19645	0	0.33002	0	0.4407	0	0.41441	0	0.38309	0	0.37164	0	0.42933	NAN	NAN
150	3	0.27789	0	0.32987	0	0.44044	0	0.42154	1	0.38271	1	0.37182	2	0.1722	NAN	NAN
200	3	0.19701	0	0.33138	0	0.44266	0	0.42328	1	0.38532	1	0.37398	2	0.17286	NAN	NAN
250	3	0.19736	0	0.3242	0	0.43822	0	0.42164	1	0.37841	1	0.36644	2	0.17103	NAN	NAN
300	4	0.19715	1	0.16959	0	0.43707	1	0.41368	1	0.37845	1	0.36651	2	0.16968	NAN	NAN
350	4	0.19561	1	0.17037	0	0.43951	1	0.42287	1	0.381	1	0.36993	2	0.16901	NAN	NAN
400	4	0.2	1	0.1716	0	0.44059	1	0.42297	1	0.38206	1	0.36997	2	0.17031	NAN	NAN
450	4	0.19338	1	0.16968	0	0.43747	1	0.42359	1	0.38059	1	0.36943	2	0.17212	NAN	NAN
500	4	0.1969	1	0.17171	2	0.28627	1	0.42693	1	0.38436	1	0.3728	2	0.16842	NAN	NAN
550	4	0.19516	1	0.16987	2	0.28753	1	0.42144	1	0.37872	1	0.36775	2	0.17125	NAN	NAN
600	4	0.19473	1	0.1699	2	0.28731	1	0.41753	1	0.3811	1	0.36943	2	0.17321	NAN	NAN
650	5	0.47249	1	0.16809	2	0.28585	1	0.41825	1	0.37667	1	0.36467	2	0.16904	NAN	NAN
700	5	0.48609	1	0.17242	2	0.28738	1	0.42216	1	0.38797	1	0.37688	2	0.17275	NAN	NAN
750	5	0.47974	1	0.17075	2	0.28833	1	0.41877	1	0.38036	1	0.36882	2	0.17028	NAN	NAN
800	5	0.48289	1	0.17152	2	0.28815	1	0.41607	1	0.38177	1	0.37043	2	0.17023	NAN	NAN
850	5	0.47459	1	0.16901	2	0.28728	1	0.41566	1	0.37519	1	0.36367	2	0.17234	NAN	NAN
900	5	0.48362	1	0.1721	2	0.2867	1	0.42154	1	0.3861	1	0.37484	2	0.17034	NAN	NAN
950	5	0.47713	1	0.16959	2	0.28715	1	0.42481	1	0.37893	1	0.36709	2	0.17012	NAN	NAN
1000	5	0.47637	1	0.16904	2	0.287	1	0.42246	1	0.38058	1	0.36909	2	0.17064	NAN	NAN
1050	5	0.48234	1	0.17166	2	0.28853	1	0.41357	1	0.38353	1	0.3714	2	0.17001	NAN	NAN
1100	5	0.48229	1	0.17144	2	0.28495	1	0.41545	1	0.38227	1	0.37088	3	0.17155	NAN	NAN
1150	5	0.4814	1	0.17163	2	0.28698	1	0.4143	1	0.38589	1	0.37505	3	0.17265	NAN	NAN
1200	5	0.47855	1	0.17048	2	0.28677	1	0.41969	1	0.3817	1	0.37024	3	0.17151	NAN	NAN
1250	5	0.47545	1	0.16895	2	0.28744	1	0.42093	1	0.37738	1	0.36543	3	0.17083	NAN	NAN
1300	5	0.46756	1	0.16586	2	0.28489	1	0.4168	1	0.37332	1	0.36204	3	0.1724	NAN	NAN
1350	5	0.48044	1	0.17053	2	0.28334	1	0.41835	1	0.3802	2	0.24409	3	0.17531	NAN	NAN
1400	5	0.48352	1	0.17062	2	0.28814	1	0.41959	1	0.38563	2	0.24343	3	0.17467	NAN	NAN
1450	5	0.47941	1	0.17095	2	0.28386	1	0.4242	1	0.38056	2	0.24179	3	0.17254	NAN	NAN
1500	5	0.47983	1	0.17075	2	0.28613	1	0.41482	1	0.37975	2	0.24346	3	0.17593	NAN	NAN
1550	5	0.47743	1	0.16984	2	0.28676	1	0.42389	1	0.37845	2	0.24048	3	0.17166	NAN	NAN
1600	5	0.47358	1	0.1689	2	0.28399	1	0.41866	1	0.37444	2	0.24001	3	0.17335	NAN	NAN
1650	5	0.47938	1	0.17174	2	0.28721	1	0.41825	1	0.38005	2	0.23967	3	0.17278	NAN	NAN
1700	5	0.47865	1	0.17031	2	0.28718	1	0.42308	1	0.37926	2	0.24087	3	0.16979	NAN	NAN
1750	5	0.4825	1	0.17042	2	0.28554	1	0.42267	1	0.38418	2	0.24419	3	0.17595	NAN	NAN
1800	5	0.48532	1	0.1724	2	0.28466	1	0.41804	1	0.38557	2	0.24631	3	0.17469	NAN	NAN
1850	5	0.47651	1	0.16957	2	0.28644	1	0.41784	1	0.37768	2	0.23974	3	0.17266	NAN	NAN
1900	5	0.47513	1	0.16873	2	0.28475	1	0.41918	1	0.37628	2	0.24075	3	0.17253	NAN	NAN
1950	5	0.47609	1	0.1694	2	0.2864	1	0.42185	1	0.37643	2	0.24078	3	0.174	NAN	NAN
2000	5	0.4798	1	0.17045	2	0.2867	1	0.41649	1	0.38079	2	0.24126	3	0.17378	NAN	NAN
2050	5	0.47479	1	0.16876	2	0.28542	1	0.41555	1	0.37783	2	0.23924	3	0.17021	NAN	NAN
2100	5	0.48022	1	0.17089	2	0.28703	1	0.42318	1	0.38386	2	0.24048	3	0.17374	NAN	NAN
2150	5	0.477	2	0.13733	2	0.28781	1	0.42348	1	0.38137	2	0.2374	3	0.17285	NAN	NAN
2200	5	0.47525	2	0.13942	2	0.28528	1	0.42195	1	0.37688	2	0.23918	3	0.17391	NAN	NAN
2250	5	0.48317	2	0.14003	2	0.28795	1	0.42072	1	0.38509	2	0.24228	3	0.17608	NAN	NAN
2300	5	0.47793	2	0.13914	2	0.28821	1	0.41326	1	0.37988	2	0.23938	3	0.17383	NAN	NAN
2350	5	0.47708	2	0.13886	2	0.28488	1	0.41263	2	0.17223	3	0.1422	3	0.1716	NAN	NAN
2400	5	0.48136	2	0.14379	2	0.28562	1	0.41242	2	0.16926	3	0.14046	3	0.1733	NAN	NAN
2450	5	0.4757	2	0.13862	2	0.28628	1	0.41042	2	0.17009	3	0.13982	3	0.17169	NAN	NAN
2500	5	0.48687	2	0.14191	2	0.28858	1	0.42409	2	0.17177	3	0.1436	3	0.17482	NAN	NAN
2550	5	0.46742	2	0.13897	2	0.28495	1	0.42925	2	0.1675	3	0.13899	3	0.17337	NAN	NAN
2600	5	0.47801	2	0.1381	3	0.29285	1	0.42552	1	0.38181	2	0.23911	3	0.17084	NAN	NAN
2650	5	0.48279	2	0.13962	3	0.29215	1	0.42134	1	0.38567	2	0.24099	3	0.17476	NAN	NAN
2700	5	0.4776	2	0.13768	3	0.29149	1	0.41877	1	0.38328	2	0.23685	3	0.17457	NAN	NAN
2750	5	0.47594	2	0.13993	3	0.29003	1	0.41938	2	0.1675	3	0.14021	3	0.17437	NAN	NAN
2800	5	0.46963	3	0.17024	3	0.28932	1	0.42409	2	0.16948	3	0.13949	3	0.1726	NAN	NAN
2850	5	0.48318	3	0.17338	3	0.29213	1	0.42195	2	0.16907	3	0.14114	3	0.17053	NAN	NAN
2900	4	0.3459	3	0.17247	3	0.29056	1	0.4199	2	0.1699	3	0.14114	3	0.17483	NAN	NAN
2950	4	0.33782	2	0.13831	3	0.28997	1	0.42082	2	0.16837	3	0.13751	3	0.16781	NAN	NAN
3000	4	0.34729	2	0.14255	3	0.29021	1	0.40639	2	0.16957	3	0.14163	3	0.17212	NAN	NAN
3050	3	0.19721	2	0.13866	3	0.28977	1	0.41576	2	0.16968	2	0.13886	3	0.17432	NAN	NAN
3100	4	0.35673	2	0.14055	3	0.29224	1	0.42359	2	0.17169	2	0.14231	3	0.17424	NAN	NAN
3150	4	0.34042	2	0.14181	3	0.29037	1	0.41482	2	0.16912	2	0.13876	3	0.17581	NAN	NAN
3200	4	0.34054	2	0.14014	3	0.29027	1	0.41336	2	0.16965	2	0.13928	3	0.17443	NAN	NAN
3250	4	0.34994	2	0.13814	3	0.29161	1	0.4167	2	0.17006	2	0.1401	3	0.17318	NAN	NAN
3300	4	0.34367	2	0.14027	3	0.29294	1	0.41815	2	0.16826	2	0.13855	3	0.17206	NAN	NAN
3350	4	0.34252	2	0.13966	3	0.29008	1	0.42308	2	0.17001	2	0.13935	3	0.1714	NAN	NAN
3400	4	0.34153	2	0.14089	3	0.29242	1	0.41908	2	0.17042	2	0.13869	3	0.17286	NAN	NAN
3450	4	0.34797	4	0.24403	3	0.29267	1	0.42031	2	0.17223	2	0.14278	3	0.1709	NAN	NAN
3500	4	0.33948	4	0.2382	4	0.45333	1	0.41742	2	0.17009	2	0.13873	3	0.17408	NAN	NAN
3550	4	0.35357	4	0.24554	4	0.46325	1	0.42267	2	0.17106	2	0.14058	3	0.17155	NAN	NAN
3600	4	0.34911	4	0.24351	4	0.461	1	0.41409	2	0.17062	2	0.14086	3	0.17254	NAN	NAN
3650	4	0.34293	4	0.23884	4	0.45564	1	0.41628	2	0.16918	2	0.13821	3	0.17292	NAN	NAN
3700	4	0.34855	4	0.24351	4	0.45993	1	0.41252	2	0.17031	2	0.14062	3	0.1718	NAN	NAN
3750	4	0.34213	4	0.24032	4	0.45533	1	0.4169	2	0.17103	2	0.14072	3	0.17396	NAN	NAN
3800	4	0.35285	4	0.24572	4	0.4654	1	0.41378	2	0.17297	2	0.14136	3	0.17218	NAN	NAN
3850	4	0.34711	4	0.24352	4	0.45979	1	0.41721	2	0.17075	2	0.1414	3	0.17333	NAN	NAN
3900	4	0.33793	4	0.23675	4	0.4526	1	0.41273	2	0.16943	2	0.1388	3	0.1736	NAN	NAN
3950	4	0.34205	4	0.23966	4	0.45685	1	0.41897	2	0.16651	2	0.13838	3	0.17496	NAN	NAN
4000	4	0.3457	4	0.24067	4	0.45646	2	0.14062	2	0.17059	2	0.13914	3	0.17257	NAN	NAN
4050	4	0.34732	4	0.24321	4	0.45985	2	0.13855	2	0.16979	2	0.14048	3	0.17157	NAN	NAN
4100	4	0.34598	4	0.24216	4	0.45959	2	0.13907	2	0.17012	2	0.14	3	0.17298	NAN	NAN
4150	4	0.34355	4	0.24061	4	0.45497	2	0.14065	2	0.17152	2	0.14103	3	0.17269	NAN	NAN
4200	4	0.34775	4	0.2429	4	0.4597	2	0.13904	2	0.17196	2	0.14113	3	0.17287	NAN	NAN
4250	4	0.3449	4	0.24143	4	0.45733	2	0.13772	2	0.1699	2	0.13911	3	0.17243	NAN	NAN
4300	4	0.34004	5	0.32182	4	0.45523	2	0.14089	2	0.17075	2	0.13986	3	0.1733	NAN	NAN
4350	4	0.35636	5	0.33724	4	0.46719	2	0.1414	2	0.17469	2	0.14214	3	0.17255	NAN	NAN
4400	4	0.34028	5	0.32273	4	0.45464	2	0.13779	2	0.16904	2	0.13814	3	0.17324	NAN	NAN
4450	4	0.33839	5	0.31915	4	0.45023	2	0.13754	2	0.16959	2	0.13793	3	0.17176	NAN	NAN
4500	4	0.35118	5	0.33521	4	0.4622	2	0.13931	2	0.17348	2	0.14471	3	0.17228	NAN	NAN
4550	4	0.35162	4	0.24635	4	0.46397	2	0.13969	2	0.171	2	0.14157	3	0.17131	NAN	NAN
4600	4	0.34487	4	0.24135	4	0.45661	2	0.13814	2	0.17023	2	0.13952	3	0.1741	NAN	NAN
4650	4	0.34408	4	0.2412	4	0.45597	2	0.1388	2	0.17004	2	0.14099	3	0.1725	NAN	NAN
4700	4	0.3517	4	0.24564	4	0.46274	2	0.1399	2	0.17264	2	0.14305	3	0.1736	NAN	NAN
4750	4	0.34467	4	0.24094	4	0.45635	2	0.14164	2	0.17128	2	0.14072	3	0.17707	NAN	NAN
4800	4	0.34332	5	0.32602	4	0.45703	2	0.14295	2	0.1692	2	0.13955	3	0.17501	NAN	NAN
4850	4	0.34205	5	0.32346	4	0.4561	2	0.13775	2	0.17004	2	0.13869	3	0.1697	NAN	NAN
4900	4	0.35188	5	0.33381	4	0.46258	2	0.13959	2	0.17215	2	0.1412	3	0.16861	NAN	NAN
4950	4	0.34671	5	0.33008	4	0.45899	2	0.13976	2	0.17204	2	0.14136	3	0.17158	NAN	NAN
5000	4	0.35295	5	0.33396	4	0.463	2	0.14079	2	0.17229	2	0.14113	3	0.17538	NAN	NAN
5050	4	0.34675	5	0.32959	4	0.45861	2	0.13993	2	0.1741	2	0.14261	3	0.17229	NAN	NAN
5100	4	0.34983	5	0.332	4	0.45993	2	0.13921	2	0.17155	2	0.14157	3	0.17164	NAN	NAN
5150	4	0.34649	5	0.32771	4	0.45952	2	0.13924	2	0.17031	2	0.13918	3	0.17107	NAN	NAN
5200	4	0.34444	5	0.32715	4	0.45687	2	0.14106	1	0.38073	1	0.36977	3	0.17311	NAN	NAN
5250	4	0.34251	5	0.32388	4	0.45682	2	0.13986	1	0.37874	1	0.36702	3	0.17067	NAN	NAN
5300	4	0.34273	4	0.23868	4	0.45577	2	0.14034	1	0.37706	1	0.36444	3	0.17522	NAN	NAN
5350	4	0.34338	4	0.23877	4	0.45575	2	0.14051	1	0.37791	1	0.36625	3	0.17667	NAN	NAN
5400	4	0.34855	4	0.24311	4	0.45919	2	0.13952	1	0.38171	1	0.36997	3	0.17438	NAN	NAN
5450	4	0.34147	5	0.32282	4	0.4547	2	0.13859	2	0.17006	2	0.13834	3	0.17228	NAN	NAN
5500	4	0.34659	5	0.32932	4	0.45776	2	0.14055	2	0.16984	2	0.14	3	0.17045	NAN	NAN
5550	4	0.34987	5	0.33285	4	0.46164	2	0.14478	2	0.17089	2	0.14164	3	0.17593	NAN	NAN
5600	4	0.34329	5	0.32592	4	0.4567	2	0.13589	2	0.17042	2	0.13938	3	0.17062	NAN	NAN
5650	4	0.34691	5	0.3285	4	0.45816	2	0.13681	2	0.1687	2	0.13938	3	0.17256	NAN	NAN
5700	4	0.34759	5	0.32983	4	0.46013	2	0.14024	3	0.17228	2	0.13997	3	0.17304	NAN	NAN
5750	4	0.34579	5	0.3298	4	0.45965	2	0.13966	3	0.1731	2	0.14245	3	0.1737	NAN	NAN
5800	4	0.34377	5	0.32631	4	0.45715	2	0.14123	2	0.25904	1	0.36787	3	0.17508	NAN	NAN
5850	4	0.3446	5	0.32576	4	0.45659	2	0.14204	2	0.25793	1	0.36645	3	0.17439	NAN	NAN
5900	4	0.34834	5	0.33096	4	0.46229	2	0.13893	2	0.2635	1	0.37404	4	0.17411	NAN	NAN
5950	4	0.34362	5	0.32483	4	0.45914	2	0.14157	2	0.26411	1	0.36933	4	0.17455	NAN	NAN
6000	4	0.34431	5	0.32707	4	0.45508	2	0.14123	2	0.25706	1	0.36726	3	0.17366	NAN	NAN
6050	4	0.34885	5	0.33209	4	0.46021	2	0.14058	2	0.26055	1	0.37385	3	0.17328	NAN	NAN
6100	4	0.35194	5	0.3335	4	0.46262	2	0.14285	2	0.2611	1	0.3746	3	0.17067	NAN	NAN
6150	4	0.34435	5	0.32681	4	0.45821	2	0.14	2	0.26356	1	0.36962	3	0.17322	NAN	NAN
6200	4	0.3488	5	0.3306	4	0.45855	2	0.14038	3	0.17371	2	0.14051	3	0.1724	NAN	NAN
6250	4	0.34227	5	0.32449	4	0.45627	2	0.13803	3	0.17263	2	0.13952	4	0.17139	NAN	NAN
6300	4	0.34369	5	0.32516	4	0.45675	2	0.14208	3	0.17318	2	0.13938	4	0.17108	NAN	NAN
6350	4	0.34684	5	0.32783	4	0.46025	2	0.13921	3	0.17258	2	0.13928	4	0.1724	NAN	NAN
6400	4	0.3484	5	0.3298	4	0.4589	2	0.14014	3	0.17146	2	0.13907	4	0.17121	NAN	NAN
6450	4	0.3475	5	0.32982	4	0.45839	2	0.14245	3	0.17274	2	0.14003	4	0.17391	NAN	NAN
6500	4	0.35101	5	0.33248	4	0.4635	2	0.1417	3	0.17565	2	0.14201	4	0.17469	NAN	NAN
6550	4	0.34606	5	0.32746	4	0.45779	2	0.139	3	0.17289	2	0.13986	4	0.17399	NAN	NAN
6600	4	0.34123	5	0.3232	3	0.289	2	0.14235	3	0.16997	2	0.13723	4	0.17287	NAN	NAN
6650	4	0.34999	5	0.33157	3	0.2931	2	0.13976	3	0.17595	2	0.1416	4	0.17255	NAN	NAN
6700	4	0.34154	5	0.32327	3	0.29257	2	0.1389	3	0.17157	2	0.13945	4	0.17165	NAN	NAN
6750	4	0.3459	5	0.32758	3	0.29104	2	0.14106	3	0.17089	2	0.13886	4	0.17161	NAN	NAN
6800	4	0.34317	5	0.32527	3	0.289	2	0.13628	3	0.16963	2	0.13733	4	0.17263	NAN	NAN
6850	4	0.34637	4	0.24207	3	0.29399	2	0.14072	3	0.17277	2	0.14024	4	0.1711	NAN	NAN
6900	4	0.34021	4	0.23774	3	0.29199	2	0.13834	3	0.1733	2	0.13886	4	0.17413	NAN	NAN
6950	4	0.342	4	0.23991	3	0.29066	2	0.14072	3	0.17198	2	0.13986	4	0.17194	NAN	NAN
7000	4	0.34656	5	0.32943	3	0.29004	2	0.13893	3	0.17284	2	0.14099	4	0.17262	NAN	NAN
7050	4	0.35013	5	0.33074	3	0.29293	2	0.13855	3	0.1736	2	0.13924	4	0.17314	NAN	NAN
7100	4	0.33921	5	0.32034	3	0.28962	2	0.13962	3	0.17014	2	0.13772	4	0.17387	NAN	NAN
7150	4	0.35049	4	0.2437	3	0.29293	2	0.13976	3	0.17665	2	0.14184	4	0.17147	NAN	NAN
7200	4	0.34862	4	0.24394	3	0.29148	2	0.14157	3	0.17312	2	0.1414	4	0.17278	NAN	NAN
7250	4	0.34655	5	0.32713	3	0.29044	2	0.13775	3	0.17036	2	0.13803	4	0.17343	NAN	NAN
7300	4	0.33941	5	0.3204	3	0.29087	2	0.13712	3	0.17016	2	0.13712	4	0.17237	NAN	NAN
7350	4	0.34839	5	0.32921	3	0.29249	2	0.13855	3	0.1738	2	0.14014	4	0.17451	NAN	NAN
7400	4	0.33956	5	0.32226	3	0.28957	2	0.14038	3	0.17207	2	0.13928	4	0.17239	NAN	NAN
7450	4	0.34894	5	0.33062	3	0.29254	2	0.1415	3	0.1743	2	0.14021	4	0.17362	NAN	NAN
7500	4	0.33879	5	0.3197	3	0.29048	2	0.14174	3	0.16852	2	0.13638	4	0.17478	NAN	NAN
7550	4	0.34703	5	0.32891	3	0.29091	2	0.13845	3	0.17065	2	0.13955	4	0.17282	NAN	NAN
7600	4	0.34142	5	0.32321	3	0.29149	2	0.14191	3	0.17219	2	0.13866	4	0.17183	NAN	NAN
7650	4	0.34427	5	0.32649	3	0.29261	2	0.14089	3	0.17296	2	0.13962	4	0.17443	NAN	NAN
7700	4	0.35141	5	0.333	3	0.29319	2	0.13962	3	0.17415	2	0.14106	4	0.17028	NAN	NAN
7750	4	0.34878	5	0.33155	3	0.29352	2	0.13983	3	0.17455	2	0.14157	4	0.17632	NAN	NAN
7800	4	0.33638	5	0.31692	3	0.29083	2	0.1417	3	0.17094	2	0.13649	4	0.17238	NAN	NAN
7850	4	0.34258	5	0.32542	3	0.291	2	0.14194	3	0.17109	2	0.13969	4	0.17458	NAN	NAN
7900	4	0.34939	5	0.33177	3	0.29368	2	0.13589	3	0.17258	2	0.14136	4	0.17465	NAN	NAN
7950	4	0.34273	5	0.32566	3	0.2905	2	0.14038	3	0.17148	2	0.13966	4	0.17278	NAN	NAN
8000	4	0.34612	5	0.32772	3	0.29057	2	0.14089	3	0.17314	2	0.13959	4	0.17284	NAN	NAN
8050	4	0.34301	5	0.32439	3	0.29235	2	0.13931	3	0.17333	2	0.1399	4	0.17471	NAN	NAN
8100	4	0.3503	5	0.33262	3	0.29094	2	0.13807	3	0.17499	2	0.14143	4	0.16993	NAN	NAN
8150	4	0.34382	5	0.32646	3	0.29127	2	0.13852	3	0.17028	2	0.13855	4	0.17377	NAN	NAN
8200	4	0.34458	5	0.32588	3	0.29241	2	0.13918	3	0.17261	2	0.13924	4	0.17256	NAN	NAN
8250	4	0.34543	5	0.32888	3	0.29291	2	0.14051	3	0.17539	2	0.14275	4	0.17268	NAN	NAN
8300	4	0.3396	5	0.32018	3	0.2888	2	0.14051	3	0.16982	2	0.13621	4	0.1731	NAN	NAN
8350	4	0.34942	5	0.33087	3	0.29493	2	0.13918	3	0.17353	2	0.14075	4	0.17283	NAN	NAN
8400	4	0.34755	5	0.32817	3	0.29257	2	0.138	3	0.17298	2	0.13893	4	0.17343	NAN	NAN
8450	4	0.34645	5	0.32843	3	0.291	2	0.14133	3	0.17397	2	0.14072	4	0.17246	NAN	NAN
8500	4	0.34518	5	0.32683	3	0.28957	2	0.14103	3	0.17103	2	0.13827	4	0.17183	NAN	NAN
8550	4	0.3505	5	0.33179	3	0.29407	2	0.1414	3	0.1757	2	0.14143	4	0.17236	NAN	NAN
8600	4	0.34069	5	0.32257	3	0.29057	2	0.14014	3	0.17028	2	0.13747	4	0.17219	NAN	NAN
8650	4	0.34693	4	0.24325	3	0.29162	2	0.14	3	0.17264	2	0.14055	4	0.17156	NAN	NAN
8700	4	0.34572	4	0.24213	3	0.29251	2	0.13744	3	0.17321	2	0.14123	4	0.17196	NAN	NAN
8750	4	0.34866	4	0.24148	3	0.29252	2	0.14167	3	0.17391	2	0.13924	4	0.17186	NAN	NAN
8800	4	0.34655	4	0.24309	3	0.29383	2	0.14106	3	0.17465	2	0.14255	4	0.1723	NAN	NAN
8850	4	0.34927	5	0.33143	3	0.29337	2	0.14003	3	0.17528	2	0.1417	4	0.17174	NAN	NAN
8900	4	0.3459	5	0.32828	3	0.29155	2	0.14174	3	0.17335	2	0.14021	4	0.17401	NAN	NAN
8950	4	0.34476	4	0.24096	3	0.29091	2	0.1415	3	0.17341	2	0.14003	4	0.17144	NAN	NAN
9000	4	0.34912	4	0.24458	3	0.29204	2	0.13976	3	0.17383	2	0.1413	4	0.17604	NAN	NAN
9050	4	0.34761	4	0.24331	3	0.29205	2	0.1417	3	0.17543	2	0.14187	4	0.17283	NAN	NAN
9100	4	0.34529	4	0.24023	3	0.2924	2	0.13959	3	0.17215	2	0.13845	4	0.17338	NAN	NAN
9150	4	0.35014	4	0.24439	3	0.29177	2	0.13921	3	0.17479	2	0.14153	4	0.1705	NAN	NAN
9200	4	0.34414	4	0.24162	3	0.29214	2	0.13793	3	0.17328	2	0.14123	4	0.1716	NAN	NAN
9250	4	0.34631	4	0.24153	3	0.29182	2	0.14065	3	0.17301	2	0.13942	4	0.17008	NAN	NAN
9300	4	0.33527	4	0.2353	3	0.29217	2	0.14248	3	0.17175	2	0.13838	4	0.17471	NAN	NAN
9350	4	0.34281	4	0.23955	3	0.29169	2	0.13653	3	0.17308	2	0.13897	4	0.17092	NAN	NAN
9400	4	0.34347	4	0.23877	3	0.29352	2	0.14045	3	0.17342	2	0.13821	4	0.17075	NAN	NAN
9450	4	0.34582	4	0.24134	3	0.29196	2	0.14003	3	0.17398	2	0.13952	4	0.1739	NAN	NAN
9500	4	0.34227	4	0.23847	3	0.29259	2	0.13852	3	0.17166	2	0.13914	4	0.17091	1	0.24338
9550	4	0.34852	4	0.24194	3	0.29091	2	0.14031	3	0.17418	2	0.13935	4	0.17379	2	0.1389
9600	4	0.34959	4	0.24312	3	0.29412	2	0.13855	3	0.17352	2	0.14079	4	0.17239	2	0.13924
9650	4	0.34925	4	0.24472	3	0.29011	4	0.14308	3	0.17366	2	0.14068	4	0.17091	2	0.14126
9700	4	0.34158	4	0.2389	3	0.29101	4	0.14058	3	0.1726	2	0.13938	4	0.17268	2	0.14045
9750	4	0.34388	4	0.24115	3	0.29097	4	0.14315	3	0.17338	2	0.14075	4	0.17439	2	0.13986
9800	4	0.34727	4	0.24215	3	0.29187	4	0.14065	3	0.17442	3	0.14027	4	0.17138	2	0.14058
9850	4	0.35068	4	0.24369	3	0.2942	4	0.13924	3	0.17422	3	0.14021	4	0.1727	2	0.13924
9900	4	0.34704	4	0.24268	3	0.29331	4	0.13897	3	0.17439	3	0.14113	4	0.17077	2	0.14458
9950	4	0.35288	4	0.24521	3	0.29408	4	0.13866	3	0.17542	4	0.24095	4	0.17189	2	0.13737
10000	4	0.35103	4	0.24457	3	0.29209	4	0.13807	3	0.1754	4	0.24289	4	0.17218	2	0.13973
10050	4	0.34701	4	0.24347	3	0.29193	4	0.13782	3	0.1735	5	0.37193	4	0.17502	2	0.13983
10100	4	0.3472	3	0.13733	3	0.29307	4	0.13911	3	0.17284	5	0.36809	4	0.17199	2	0.13921
10150	4	0.352	2	0.17138	3	0.29114	4	0.14079	3	0.17385	5	0.37516	4	0.17262	2	0.14027
10200	4	0.34812	2	0.17117	3	0.29303	4	0.13705	3	0.17327	5	0.37141	4	0.16941	2	0.14231
10250	4	0.33669	2	0.17138	3	0.29046	4	0.13827	3	0.17259	5	0.36416	4	0.17385	2	0.14136
10300	4	0.34592	2	0.1719	3	0.29036	4	0.13966	3	0.17391	5	0.37064	4	0.17299	2	0.14024
10350	4	0.34019	2	0.17009	3	0.29105	4	0.13768	3	0.17287	5	0.36442	4	0.17212	2	0.13821
10400	4	0.34614	2	0.16884	3	0.29154	4	0.13807	3	0.17275	5	0.36796	4	0.1746	2	0.13928
10450	4	0.3394	2	0.17073	3	0.29322	4	0.13789	3	0.17262	5	0.36416	4	0.17137	2	0.1389
10500	4	0.34182	2	0.17155	3	0.29335	4	0.14238	3	0.17248	5	0.36828	4	0.17259	2	0.13914
10550	4	0.34615	2	0.171	3	0.29405	4	0.14055	3	0.17303	5	0.37026	4	0.17214	2	0.13921
10600	4	0.34418	2	0.16954	3	0.28981	4	0.14055	3	0.17239	5	0.36644	4	0.17564	2	0.13862
10650	4	0.34693	2	0.17204	3	0.29185	4	0.14027	3	0.1745	5	0.37147	4	0.174	2	0.14014
10700	4	0.34469	2	0.17067	3	0.29144	4	0.13966	3	0.17202	5	0.36921	4	0.17502	2	0.14181
10750	4	0.34055	2	0.17001	3	0.29007	4	0.14184	3	0.1727	5	0.36478	4	0.17275	2	0.13986
10800	4	0.35126	2	0.17133	3	0.29339	4	0.13772	4	0.33896	5	0.37348	4	0.17079	2	0.14096
10850	4	0.34213	2	0.16929	3	0.29143	4	0.14116	4	0.32871	5	0.36496	4	0.17505	2	0.14106
10900	4	0.34735	2	0.17075	3	0.29238	4	0.13983	4	0.33345	5	0.37109	4	0.17041	2	0.14065
10950	4	0.34699	1	0.32857	3	0.29153	4	0.14017	5	0.38115	5	0.3694	4	0.17416	2	0.13904
11000	4	0.34631	1	0.32789	3	0.29025	5	0.41721	5	0.3809	5	0.36962	4	0.1716	2	0.14041
11050	4	0.34847	1	0.32855	3	0.29312	5	0.41773	4	0.33289	5	0.37108	4	0.17021	2	0.1367
11100	4	0.34011	1	0.32211	3	0.2889	5	0.4245	4	0.32522	5	0.36391	4	0.17349	2	0.13793
11150	3	0.1984	1	0.32447	3	0.29155	5	0.43056	4	0.32784	5	0.36702	4	0.17119	2	0.14082
11200	3	0.20054	1	0.33239	3	0.29271	5	0.41763	4	0.33549	5	0.37598	4	0.17387	2	0.14017
11250	3	0.19841	1	0.32897	3	0.28951	5	0.42144	4	0.33217	5	0.3708	4	0.1746	2	0.14092
11300	3	0.20056	1	0.32904	3	0.29269	4	0.13938	5	0.38227	5	0.37002	4	0.17252	2	0.13782
11350	3	0.19906	1	0.32921	3	0.28995	5	0.41835	5	0.38145	5	0.36977	4	0.17609	2	0.13845
11400	3	0.19787	1	0.32686	3	0.29241	5	0.42134	5	0.37969	5	0.36874	4	0.17197	2	0.14147
11450	3	0.19974	0	0.32267	3	0.29102	4	0.14167	5	0.37615	5	0.36388	4	0.17137	2	0.13831
11500	3	0.19843	0	0.3228	3	0.2922	4	0.14099	4	0.16887	4	0.13945	4	0.17277	2	0.13758
11550	3	0.19688	0	0.31603	3	0.28989	5	0.42875	4	0.16826	4	0.13691	4	0.17315	2	0.13983
11600	3	0.19941	0	0.32637	3	0.29318	5	0.41357	4	0.17108	4	0.13949	4	0.17556	2	0.13942
11650	3	0.19806	0	0.32769	3	0.29072	4	0.13938	4	0.1702	4	0.14007	4	0.17156	2	0.14007
11700	3	0.19846	0	0.32773	3	0.29162	5	0.42	4	0.1724	4	0.14038	4	0.17286	2	0.14126
11750	3	0.1986	0	0.32058	3	0.29021	5	0.42814	4	0.1699	4	0.13838	3	0.17177	2	0.13979
11800	3	0.19823	0	0.32645	3	0.28974	5	0.4198	4	0.16915	4	0.13955	4	0.17157	2	0.14248
11850	3	0.19783	0	0.32417	3	0.29168	5	0.42164	4	0.16965	4	0.13979	4	0.17394	2	0.13893
11900	2	0.19226	0	0.31586	3	0.29064	5	0.41545	4	0.16741	4	0.13744	4	0.17079	2	0.13969
11950	3	0.19626	0	0.32524	2	0.34064	5	0.42481	4	0.16867	4	0.13959	4	0.17398	2	0.13969
12000	2	0.19419	0	0.32248	3	0.29163	5	0.42613	4	0.16809	4	0.13786	3	0.1702	2	0.14062
12050	1	0.48172	0	0.33188	3	0.29222	5	0.41908	4	0.17031	4	0.14014	3	0.16688	2	0.13976
12100	1	0.48404	0	0.32785	3	0.29328	5	0.42338	4	0.17053	4	0.13973	3	0.16965	2	0.13928
12150	1	0.4784	0	0.32522	3	0.29034	5	0.41773	4	0.1697	4	0.13866	3	0.1699	2	0.1389
12200	1	0.47659	0	0.32025	2	0.34495	5	0.42103	4	0.16912	4	0.13817	3	0.16937	2	0.13969
12250	1	0.48298	0	0.33455	3	0.29139	5	0.41587	4	0.17169	4	0.14228	4	0.17257	2	0.13886
12300	1	0.47681	0	0.32618	3	0.29268	5	0.41701	4	0.17114	4	0.14014	3	0.17009	2	0.1388
12350	0	0.48104	0	0.33315	3	0.29358	5	0.41576	4	0.17207	4	0.14187	4	0.1732	2	0.14113
12400	1	0.4703	0	0.32065	3	0.28999	5	0.41368	4	0.16792	4	0.13775	4	0.17161	3	0.24045
12450	1	0.47575	0	0.32186	3	0.29063	5	0.42267	4	0.17059	4	0.13986	4	0.17409	3	0.24074
12500	1	0.48121	0	0.33099	3	0.29415	5	0.4198	4	0.17305	4	0.14055	3	0.17073	3	0.23875
12550	1	0.4768	0	0.33013	3	0.29199	5	0.42021	4	0.17141	4	0.13969	4	0.173	3	0.24006
12600	2	0.3987	0	0.33239	3	0.29378	5	0.42134	4	0.17182	4	0.14116	3	0.17048	2	0.13962
12650	1	0.39593	0	0.32419	3	0.29188	5	0.42246	4	0.16943	4	0.13803	4	0.1734	2	0.14208
12700	1	0.39141	0	0.33047	3	0.29234	5	0.41918	4	0.17051	4	0.1413	3	0.1722	2	0.1373
12750	1	0.39508	0	0.33902	3	0.29239	5	0.42562	4	0.17294	4	0.14332	4	0.17416	2	0.14312
12800	1	0.39107	0	0.33455	3	0.29119	4	0.13831	4	0.17199	4	0.14255	4	0.17401	2	0.14079
12850	2	0.39259	0	0.3364	3	0.29284	4	0.13962	4	0.17234	4	0.14248	4	0.17003	2	0.14034
12900	1	0.39449	0	0.33472	3	0.29252	4	0.14045	4	0.17307	4	0.14194	4	0.17326	2	0.14345
12950	1	0.3935	0	0.32404	3	0.28927	4	0.14092	4	0.16809	4	0.13737	4	0.17141	2	0.14096
13000	1	0.39307	0	0.32884	3	0.2923	4	0.13955	4	0.1689	4	0.13952	4	0.17189	2	0.14143
13050	1	0.39093	0	0.32831	3	0.29146	4	0.13834	4	0.16998	4	0.14184	4	0.17546	2	0.14021
13100	1	0.39802	0	0.33051	3	0.29226	4	0.14068	4	0.17089	4	0.14031	4	0.17131	2	0.13924
13150	1	0.38985	0	0.33446	3	0.29284	4	0.14103	4	0.17283	4	0.14082	4	0.171	2	0.14089
13200	1	0.38829	0	0.32869	3	0.29245	4	0.14235	4	0.17092	4	0.14045	4	0.17337	2	0.13942
13250	1	0.39106	0	0.3307	3	0.29126	4	0.139	4	0.1699	4	0.13983	4	0.17171	2	0.1381
13300	1	0.39277	0	0.33036	3	0.29303	3	0.14157	4	0.17152	4	0.14062	4	0.17169	2	0.13733
13350	1	0.38851	0	0.32233	3	0.2909	4	0.14109	4	0.17017	4	0.13914	4	0.17205	2	0.14103
13400	1	0.39353	0	0.32795	3	0.29142	4	0.14261	4	0.1713	4	0.14045	4	0.17265	2	0.13897
13450	1	0.38754	0	0.32571	3	0.29116	4	0.14157	4	0.16792	4	0.13814	4	0.16986	2	0.13747
13500	0	0.48029	0	0.32847	3	0.29148	4	0.13949	4	0.16987	4	0.13838	4	0.17425	3	0.24287
13550	0	0.48363	0	0.33269	3	0.29375	4	0.14024	4	0.17269	4	0.1417	4	0.17193	3	0.24448
13600	1	0.47077	0	0.32124	3	0.28964	4	0.14065	4	0.16876	4	0.13817	4	0.17026	3	0.2407
13650	0	0.47984	0	0.32668	3	0.29331	4	0.14126	4	0.17256	4	0.14079	4	0.17288	3	0.24211
13700	0	0.47952	0	0.32788	3	0.29136	4	0.14228	4	0.16937	4	0.13962	4	0.17305	3	0.24128
13750	1	0.3921	0	0.32465	3	0.29257	4	0.14	4	0.17138	4	0.13931	4	0.174	3	0.23825
13800	1	0.39771	0	0.32608	3	0.29019	4	0.13949	4	0.1689	4	0.13897	4	0.17035	3	0.24023
13850	1	0.39463	0	0.32491	3	0.29161	4	0.14181	4	0.17117	4	0.14007	3	0.17086	3	0.237
13900	1	0.38964	0	0.32816	3	0.291	4	0.14041	4	0.17084	4	0.13873	3	0.17196	3	0.23925
13950	1	0.38868	0	0.32355	3	0.29021	4	0.14218	3	0.1702	3	0.13962	3	0.17141	3	0.24153
14000	1	0.39395	0	0.32488	3	0.29192	4	0.13796	3	0.1702	3	0.13993	3	0.17095	3	0.2427
14050	1	0.38925	0	0.32784	3	0.29162	4	0.14191	3	0.16954	3	0.13907	3	0.17106	3	0.24029
14100	1	0.39385	1	0.32714	3	0.29096	4	0.13869	3	0.1704	3	0.1413	3	0.17272	3	0.2407
14150	1	0.39297	1	0.32255	3	0.29204	4	0.13973	3	0.17059	3	0.1389	3	0.16772	3	0.23873
14200	1	0.39119	1	0.33216	3	0.292	4	0.1401	3	0.17117	3	0.13945	3	0.16764	2	0.139
14250	1	0.39161	1	0.32983	3	0.29199	4	0.13959	3	0.16998	3	0.13973	3	0.16915	2	0.13911
14300	1	0.39435	0	0.32903	3	0.29146	3	0.13973	3	0.16929	3	0.13907	3	0.17259	2	0.13928
14350	1	0.39889	1	0.24728	3	0.29321	3	0.14238	3	0.17318	3	0.14261	3	0.16962	3	0.23909
14400	1	0.3823	1	0.23949	3	0.28979	3	0.14245	2	0.25786	3	0.13758	3	0.17081	3	0.24337
14450	1	0.38978	1	0.24484	3	0.29286	3	0.14275	2	0.26216	3	0.14126	3	0.17166	3	0.24586
14500	1	0.39379	2	0.24278	3	0.29454	3	0.13845	2	0.26395	3	0.14038	3	0.16831	3	0.23896
14550	1	0.39628	2	0.245	3	0.29288	3	0.13931	2	0.26552	3	0.1412	3	0.1694	3	0.24139
14600	1	0.39645	2	0.24373	3	0.29358	3	0.14021	1	0.26301	3	0.14167	2	0.16968	3	0.24046
14650	1	0.39126	2	0.24049	3	0.29162	3	0.13886	1	0.25894	3	0.14017	2	0.17067	3	0.23849
14700	1	0.3928	2	0.24238	3	0.29295	3	0.13942	1	0.25921	3	0.1415	3	0.16995	3	0.24106
14750	1	0.38861	1	0.33553	3	0.2928	3	0.14051	1	0.2579	3	0.14392	2	0.17391	3	0.23948
14800	1	0.38899	1	0.32531	3	0.2903	3	0.13873	1	0.25786	3	0.13698	2	0.17023	2	0.1399
14850	0	0.47727	1	0.32295	3	0.29216	3	0.139	1	0.25919	3	0.13976	2	0.16926	3	0.24203
14900	0	0.47804	1	0.32641	3	0.29201	3	0.1417	1	0.25886	3	0.14003	2	0.16932	3	0.24114
14950	0	0.48311	1	0.33358	2	0.34378	3	0.14072	1	0.2598	3	0.14241	2	0.16862	3	0.24708
15000	0	0.47667	1	0.32827	2	0.34106	3	0.14123	1	0.25681	3	0.14164	2	0.17125	3	0.23852
15050	0	0.48009	1	0.32579	2	0.34332	3	0.14191	1	0.26082	3	0.13986	2	0.1687	3	0.2432
15100	0	0.47695	1	0.32657	2	0.34124	3	0.13876	1	0.25791	3	0.13914	2	0.17067	3	0.24109
15150	0	0.47595	1	0.32473	2	0.34271	3	0.14153	1	0.25872	3	0.13914	2	0.1728	3	0.24565
15200	0	0.47978	1	0.33415	2	0.33996	3	0.13952	1	0.25731	3	0.14228	2	0.17119	3	0.23721
15250	0	0.47951	1	0.32841	1	0.3436	3	0.13893	1	0.25889	3	0.14089	2	0.17078	3	0.24063
15300	0	0.47953	1	0.32959	1	0.34299	3	0.13845	0	0.38138	3	0.14065	2	0.17248	3	0.23783
15350	0	0.48345	1	0.32785	2	0.34532	3	0.13838	0	0.38327	3	0.13883	2	0.17095	3	0.24291
15400	0	0.47494	1	0.3296	1	0.33972	2	0.14181	0	0.38019	3	0.13945	2	0.1716	3	0.24174
15450	0	0.475	1	0.32554	1	0.34235	3	0.14007	1	0.37786	4	0.13859	2	0.17059	3	0.24149
15500	0	0.48205	1	0.32529	1	0.34584	2	0.13838	1	0.38089	4	0.13893	2	0.17218	3	0.23939
15550	0	0.47799	1	0.32879	1	0.34165	3	0.13942	1	0.38014	4	0.14068	2	0.17001	3	0.24383
15600	0	0.48174	1	0.33132	1	0.34435	3	0.13949	0	0.38426	3	0.14017	2	0.17015	3	0.24259
15650	0	0.48024	1	0.33244	1	0.34329	3	0.1414	0	0.38363	2	0.23911	2	0.17006	3	0.2399
15700	0	0.483	1	0.3301	1	0.34452	3	0.14181	0	0.3836	2	0.24409	2	0.17073	3	0.24019
15750	0	0.48137	1	0.33079	1	0.34349	3	0.13814	0	0.38294	2	0.24164	2	0.17174	3	0.23957
15800	0	0.47713	1	0.32548	1	0.34295	3	0.14103	0	0.37821	2	0.2398	2	0.17081	3	0.24232
15850	0	0.48554	1	0.33069	1	0.34617	3	0.14187	1	0.38552	3	0.24702	2	0.17106	3	0.24308
15900	0	0.47726	1	0.3274	1	0.34237	3	0.14	1	0.37934	3	0.24006	2	0.17053	3	0.24532
15950	0	0.47916	1	0.32845	1	0.34302	3	0.13907	1	0.38114	3	0.24135	2	0.17092	3	0.23995
16000	0	0.48482	1	0.341	1	0.34154	2	0.13772	0	0.39026	2	0.24066	2	0.17028	3	0.24205
16050	0	0.48128	1	0.32681	1	0.34543	3	0.14082	0	0.38151	2	0.24315	2	0.17144	3	0.24307
16100	0	0.48343	1	0.32771	1	0.34552	2	0.1414	1	0.26389	2	0.2457	2	0.1689	3	0.24333
16150	0	0.48658	1	0.3344	1	0.34493	2	0.13997	1	0.26217	2	0.2443	2	0.17196	3	0.23956
16200	0	0.47868	1	0.32753	1	0.34384	1	0.14031	1	0.26021	2	0.24101	2	0.17152	3	0.23978
16250	0	0.48209	1	0.32954	1	0.34431	1	0.13949	1	0.26132	2	0.24369	2	0.17278	3	0.24211
16300	0	0.47621	1	0.32421	1	0.3427	1	0.14147	1	0.2588	2	0.24054	2	0.16976	3	0.24179
16350	0	0.48006	1	0.32735	1	0.3436	1	0.13848	0	0.3809	2	0.2417	2	0.17253	3	0.24274
16400	0	0.47788	1	0.32558	1	0.34223	1	0.14065	0	0.37793	2	0.2415	2	0.1718	3	0.24395
16450	0	0.47839	1	0.32177	1	0.34249	1	0.14164	0	0.37657	2	0.24323	2	0.17155	3	0.23983
16500	0	0.4791	1	0.32447	1	0.34296	1	0.14075	0	0.37875	2	0.24293	2	0.16814	3	0.24308
16550	0	0.48431	1	0.33136	1	0.34505	1	0.1414	0	0.38486	2	0.24428	2	0.17149	3	0.24032
16600	0	0.47643	1	0.32371	1	0.34178	2	0.13938	0	0.37778	2	0.24076	2	0.1713	3	0.23927
16650	0	0.4802	1	0.32901	1	0.34326	2	0.14038	0	0.38171	2	0.24189	2	0.17089	3	0.2415
16700	0	0.48722	1	0.3295	1	0.34715	2	0.14204	0	0.38519	2	0.24796	2	0.16962	3	0.24393
16750	0	0.47274	1	0.32153	1	0.34199	2	0.13949	0	0.37478	1	0.23843	2	0.16887	3	0.24354
16800	0	0.47505	1	0.32388	1	0.34193	2	0.14184	0	0.37637	1	0.23866	2	0.17009	3	0.23892
16850	0	0.48366	1	0.3254	1	0.34627	3	0.14072	0	0.38121	2	0.24632	2	0.17155	3	0.249
16900	0	0.48232	1	0.33346	1	0.34378	2	0.13997	0	0.38565	2	0.24188	2	0.17166	3	0.2438
16950	0	0.47775	1	0.32812	1	0.34226	2	0.14	0	0.38034	2	0.23933	2	0.16901	3	0.23995
17000	0	0.47623	1	0.32545	1	0.34194	2	0.14072	0	0.3781	2	0.23956	2	0.16993	3	0.24499
17050	0	0.48471	1	0.33262	1	0.34623	2	0.138	0	0.38557	2	0.24391	2	0.17084	3	0.24206
17100	0	0.47349	2	0.23852	1	0.3418	1	0.1388	0	0.37443	2	0.23773	2	0.17017	3	0.24252
17150	0	0.48004	2	0.24223	1	0.34364	1	0.1399	0	0.38064	2	0.24187	2	0.17075	3	0.24452
17200	0	0.48724	2	0.24755	1	0.34502	2	0.13744	0	0.38859	2	0.24429	2	0.17059	3	0.23874
17250	0	0.48601	2	0.24727	1	0.34479	1	0.14184	1	0.38793	3	0.24256	2	0.16976	3	0.24133
17300	0	0.48287	2	0.23982	1	0.34675	2	0.14082	1	0.37898	3	0.2469	2	0.17084	3	0.2383
17350	0	0.48141	2	0.24044	1	0.34597	2	0.13983	1	0.38091	3	0.24417	2	0.16923	3	0.23974
17400	0	0.47707	1	0.32005	1	0.34554	1	0.14197	1	0.37461	3	0.24291	2	0.16957	3	0.24296
17450	0	0.48068	1	0.32652	1	0.34499	1	0.14231	1	0.38064	3	0.24301	2	0.16856	3	0.24361
17500	0	0.48169	1	0.3302	1	0.34343	2	0.14058	1	0.38249	3	0.24181	2	0.17136	3	0.24423
17550	0	0.47775	2	0.23822	1	0.34425	1	0.14092	1	0.37686	3	0.24247	2	0.17001	3	0.23773
17600	0	0.48373	2	0.24267	1	0.34647	1	0.14109	1	0.38342	3	0.24501	2	0.16957	3	0.24303
17650	0	0.47674	2	0.23976	1	0.34347	2	0.13876	1	0.37882	3	0.24001	2	0.16959	3	0.24116
17700	0	0.48006	2	0.2415	1	0.34423	1	0.13969	1	0.38074	3	0.24265	2	0.16907	3	0.23902
17750	0	0.47896	2	0.23943	1	0.34461	2	0.14048	2	0.26117	3	0.24276	2	0.1687	3	0.24156
17800	0	0.4747	2	0.23932	1	0.34178	2	0.14072	2	0.25781	3	0.23902	2	0.1721	3	0.24166
17850	0	0.47969	2	0.24013	1	0.3434	2	0.14089	2	0.26192	3	0.24345	2	0.17023	3	0.24138
17900	0	0.48081	2	0.24324	1	0.34342	2	0.14153	2	0.25928	3	0.24107	2	0.16893	3	0.24104
17950	0	0.48065	2	0.24101	1	0.34527	3	0.14197	2	0.26146	3	0.24384	2	0.17125	3	0.23638
18000	0	0.48362	2	0.24426	1	0.3449	1	0.14003	2	0.2616	3	0.24354	2	0.17302	3	0.2442
18050	0	0.48012	2	0.24183	1	0.34345	1	0.13564	2	0.26059	3	0.24237	2	0.17136	3	0.23986
18100	0	0.47819	2	0.24267	1	0.34067	1	0.14113	2	0.25747	3	0.23897	2	0.17119	3	0.24552
18150	0	0.47706	2	0.2398	1	0.34245	2	0.13945	2	0.25887	3	0.24071	2	0.17166	3	0.23732
18200	0	0.47175	2	0.23615	1	0.34182	1	0.13852	2	0.25729	3	0.23843	2	0.16932	3	0.24251
18250	0	0.48453	2	0.24379	1	0.34603	1	0.1374	2	0.26259	3	0.24564	2	0.16887	3	0.24118
18300	0	0.47192	1	0.23702	1	0.34223	1	0.13796	2	0.25567	3	0.23782	2	0.16912	3	0.23843
18350	0	0.48205	1	0.24467	1	0.34453	1	0.14086	2	0.25955	3	0.2407	2	0.17201	3	0.24173
18400	0	0.48331	1	0.24353	1	0.34411	1	0.13938	2	0.26154	3	0.24466	2	0.17185	3	0.24065
18450	0	0.47986	1	0.24515	1	0.34289	1	0.13782	2	0.2566	3	0.23796	2	0.17248	3	0.23998
18500	0	0.47203	1	0.23812	1	0.33975	1	0.14058	2	0.25522	3	0.23695	2	0.17152	3	0.2504
18550	0	0.48393	1	0.24397	1	0.34309	1	0.14099	2	0.26204	3	0.24385	2	0.17095	3	0.242
18600	0	0.48205	1	0.24238	1	0.34329	1	0.14235	1	0.38144	3	0.24382	2	0.17073	3	0.241
18650	0	0.47404	1	0.2396	1	0.33994	1	0.13709	1	0.3767	3	0.23684	2	0.17073	3	0.24116
18700	0	0.48237	1	0.24274	1	0.34401	2	0.13859	1	0.38303	3	0.24406	2	0.17073	3	0.24412
18750	0	0.47798	1	0.24204	1	0.34152	1	0.14174	1	0.37923	3	0.23906	2	0.17062	3	0.24594
18800	0	0.47881	1	0.23755	2	0.34566	1	0.13993	1	0.37652	3	0.24512	3	0.17158	3	0.24408
18850	0	0.4768	1	0.23865	2	0.3431	3	0.13758	1	0.37674	3	0.24127	3	0.16879	3	0.23677
18900	0	0.47914	1	0.24245	2	0.3416	2	0.13841	1	0.38242	3	0.24142	3	0.17136	3	0.24257
18950	0	0.47745	1	0.24192	2	0.34176	1	0.13911	1	0.37954	3	0.23882	2	0.17042	3	0.24707
19000	0	0.47586	1	0.23888	2	0.34242	1	0.13893	1	0.37718	3	0.24059	2	0.17259	3	0.24256
19050	0	0.48164	1	0.24398	2	0.34263	1	0.13824	1	0.38338	3	0.24151	2	0.1725	3	0.23804
19100	0	0.48451	1	0.24586	2	0.34558	1	0.14308	1	0.38728	3	0.24263	2	0.17059	3	0.24319
19150	0	0.48739	1	0.2447	2	0.34742	2	0.14014	1	0.38572	3	0.24713	3	0.16957	3	0.24234
19200	0	0.47458	1	0.23928	2	0.33999	1	0.13855	2	0.25695	3	0.23836	3	0.17256	3	0.24489
19250	0	0.47813	1	0.24213	2	0.34318	2	0.14191	2	0.25785	3	0.23952	3	0.17023	3	0.24376
19300	0	0.47861	1	0.24167	2	0.34125	2	0.13935	2	0.25911	3	0.2404	3	0.16795	3	0.23788
19350	0	0.47714	1	0.2401	2	0.34221	2	0.1414	2	0.25976	3	0.24083	3	0.17017	3	0.24497
19400	0	0.4829	1	0.24421	3	0.29126	1	0.13897	2	0.26096	3	0.24277	3	0.16962	3	0.23988
19450	0	0.47755	1	0.24122	3	0.29175	1	0.14	2	0.25787	3	0.23994	3	0.16837	3	0.23885
19500	0	0.47994	1	0.24117	3	0.28866	1	0.13691	2	0.25995	3	0.24303	3	0.17051	3	0.24284
19550	0	0.47682	1	0.24188	3	0.29481	1	0.13782	2	0.25691	3	0.23848	3	0.17158	3	0.24528
19600	0	0.48538	1	0.24653	3	0.29346	1	0.14187	2	0.26081	3	0.24337	3	0.17218	3	0.24332
19650	0	0.47829	1	0.24198	3	0.29177	2	0.13817	2	0.25853	3	0.2398	2	0.17133	3	0.24455
19700	0	0.47881	1	0.24272	3	0.29359	2	0.14096	2	0.25748	3	0.23969	2	0.17081	3	0.24422
19750	0	0.47564	1	0.23831	3	0.29153	2	0.13966	2	0.25909	3	0.24045	2	0.17234	3	0.23953
19800	0	0.47909	1	0.24014	3	0.29231	1	0.13969	2	0.26128	3	0.24208	2	0.17092	3	0.23851
19850	0	0.48079	1	0.2417	3	0.29079	1	0.14136	2	0.26191	3	0.24386	2	0.16845	3	0.23907
19900	0	0.47778	1	0.24185	3	0.2904	1	0.14058	2	0.25764	3	0.23967	2	0.16957	3	0.24519
19950	0	0.47926	1	0.24043	3	0.29219	1	0.13979	2	0.26045	3	0.24212	2	0.17147	3	0.24132
20000	0	0.48579	1	0.24418	2	0.34712	1	0.13966	2	0.26319	3	0.24525	2	0.17048	3	0.24057
20050	0	0.47573	1	0.24115	2	0.34189	1	0.14116	2	0.25626	3	0.23854	3	0.17048	3	0.23873
20100	0	0.48212	1	0.2435	2	0.34396	1	0.14113	2	0.26039	3	0.24223	3	0.17056	3	0.24
20150	0	0.47916	1	0.24285	2	0.34143	1	0.14068	2	0.25794	3	0.23976	3	0.17136	3	0.24008
20200	0	0.48116	1	0.24121	2	0.34432	1	0.14123	2	0.26201	3	0.24416	3	0.17234	3	0.24295
20250	0	0.47299	1	0.23877	2	0.33909	1	0.14062	2	0.2559	3	0.23686	3	0.1719	3	0.24464
20300	0	0.4766	1	0.24161	2	0.34334	1	0.13866	2	0.2565	3	0.23765	3	0.17001	3	0.24287
20350	0	0.48972	1	0.24632	2	0.34741	2	0.13942	2	0.26551	3	0.24885	3	0.16848	3	0.24397
20400	0	0.47639	1	0.24082	2	0.34212	2	0.13969	2	0.2574	3	0.23844	3	0.16834	3	0.24082
20450	0	0.48359	1	0.24469	2	0.34372	1	0.13911	2	0.26143	3	0.2432	3	0.17174	3	0.23985
20500	0	0.46572	1	0.23213	2	0.34047	1	0.13907	2	0.25506	3	0.23551	3	0.17399	3	0.24047
20550	0	0.4728	1	0.23558	2	0.34298	1	0.13726	2	0.25897	3	0.24049	3	0.16831	3	0.23836
20600	0	0.48375	1	0.24352	2	0.34498	1	0.14003	2	0.26206	3	0.24405	3	0.1716	3	0.23584
20650	0	0.47024	1	0.23566	2	0.34027	1	0.13886	2	0.25515	3	0.23782	3	0.17158	3	0.2365
20700	0	0.48337	1	0.24264	2	0.34469	1	0.14021	1	0.38219	3	0.24479	3	0.16948	3	0.24159
20750	0	0.48325	1	0.24447	2	0.34442	1	0.13952	1	0.38582	3	0.24231	3	0.17017	3	0.23697
20800	0	0.47864	1	0.24332	2	0.34345	1	0.14017	1	0.38332	3	0.23866	3	0.16862	3	0.24211
20850	0	0.47474	1	0.24043	2	0.34163	1	0.14177	2	0.2568	3	0.23731	3	0.17394	3	0.24623
20900	0	0.47775	1	0.24164	2	0.34129	1	0.14072	2	0.25853	3	0.24031	3	0.17297	3	0.24009
20950	0	0.48405	1	0.24365	2	0.34483	1	0.1416	2	0.2629	3	0.2452	3	0.171	3	0.24185
21000	0	0.47961	1	0.24148	2	0.34304	1	0.13775	2	0.25944	3	0.24196	3	0.16856	3	0.24158
21050	0	0.48509	1	0.24581	2	0.34447	1	0.14051	2	0.26085	3	0.24366	3	0.17053	3	0.24199
21100	0	0.4785	1	0.24203	2	0.3426	1	0.14089	2	0.25806	3	0.23979	3	0.17001	3	0.24237
21150	0	0.48228	1	0.24314	2	0.34498	1	0.1373	2	0.26134	3	0.2432	3	0.17042	3	0.24484
21200	0	0.48634	1	0.24283	2	0.34723	1	0.13993	1	0.38389	3	0.24741	3	0.17177	3	0.23961
21250	0	0.47574	1	0.23779	2	0.34346	1	0.13897	1	0.37467	3	0.24048	3	0.17204	3	0.23843
21300	0	0.4767	1	0.23908	2	0.34255	1	0.14072	1	0.37555	3	0.24	3	0.17012	3	0.23956
21350	0	0.47306	1	0.23596	2	0.34226	1	0.13737	1	0.37259	3	0.2405	3	0.17009	3	0.24004
21400	0	0.47783	1	0.24135	2	0.34214	1	0.13855	1	0.38045	3	0.24093	3	0.17234	3	0.24005
21450	0	0.4839	1	0.24381	2	0.34415	1	0.14038	1	0.384	3	0.24429	3	0.16867	3	0.24682
21500	0	0.47612	1	0.24005	2	0.34174	1	0.139	1	0.37851	3	0.23883	3	0.17149	3	0.24559
21550	0	0.48063	1	0.24163	2	0.34437	1	0.13803	1	0.38139	3	0.24199	3	0.16909	3	0.23881
21600	0	0.47123	1	0.23572	2	0.33981	1	0.13931	0	0.37139	2	0.23916	3	0.17051	3	0.24134
21650	0	0.48684	1	0.2444	2	0.34612	1	0.13949	0	0.38614	2	0.24654	3	0.17067	3	0.24019
21700	0	0.47805	1	0.24147	2	0.34232	1	0.13907	1	0.38067	3	0.24037	3	0.17337	3	0.2415
21750	0	0.48549	1	0.24418	2	0.34752	1	0.14014	0	0.38818	2	0.24543	3	0.16915	3	0.24651
21800	0	0.47887	1	0.24265	2	0.34009	1	0.14218	1	0.38063	3	0.23969	2	0.17152	3	0.24561
21850	0	0.47556	1	0.23947	2	0.34175	1	0.14007	1	0.37739	3	0.23971	2	0.17231	3	0.24057
21900	0	0.48098	1	0.24426	2	0.3422	1	0.14103	1	0.38471	3	0.24089	2	0.16937	3	0.2412
21950	0	0.47118	1	0.23524	2	0.34223	1	0.14113	1	0.37224	3	0.23925	2	0.16951	3	0.2464
22000	0	0.48259	1	0.24455	2	0.34382	1	0.14126	1	0.38438	3	0.24306	2	0.16817	3	0.23395
22050	0	0.47577	1	0.23949	2	0.34148	1	0.13775	1	0.37677	3	0.23973	2	0.17111	3	0.24069
22100	0	0.48545	1	0.24453	2	0.34582	2	0.13834	1	0.38605	3	0.24519	2	0.16915	3	0.23816
22150	0	0.48115	1	0.24133	2	0.34443	2	0.13681	1	0.38007	3	0.24386	2	0.16781	3	0.2437
22200	0	0.48429	1	0.24399	2	0.34487	1	0.13904	1	0.38382	3	0.24375	2	0.17078	3	0.23878
22250	0	0.48671	1	0.2459	2	0.34652	1	0.13793	1	0.38718	3	0.24537	2	0.17305	3	0.24246
22300	0	0.47619	1	0.23961	2	0.34254	1	0.14055	2	0.25883	3	0.23998	2	0.17188	3	0.24229
22350	0	0.47616	1	0.24053	2	0.34194	1	0.13789	2	0.257	3	0.23864	2	0.17086	3	0.23733
22400	0	0.4794	1	0.24192	2	0.34478	1	0.14231	2	0.25885	3	0.24083	2	0.17001	3	0.24017
22450	0	0.48003	1	0.24022	2	0.34533	1	0.1412	2	0.26167	3	0.24276	2	0.16817	3	0.24091
22500	1	0.48414	1	0.24372	2	0.34527	1	0.14258	2	0.26242	3	0.24444	2	0.16867	3	0.24112
22550	0	0.48326	1	0.24623	2	0.34181	1	0.13973	2	0.25887	3	0.24114	2	0.16842	3	0.2422
22600	0	0.47745	2	0.24138	2	0.34174	1	0.14113	2	0.25826	3	0.23949	2	0.1707	3	0.24475
22650	0	0.4772	2	0.23848	2	0.34277	1	0.14082	2	0.26039	3	0.24176	2	0.16876	3	0.24122
22700	1	0.47488	2	0.2406	2	0.34133	1	0.14065	2	0.25598	3	0.23736	2	0.16962	3	0.24187
22750	1	0.4823	2	0.24418	2	0.34316	1	0.13831	2	0.25981	3	0.2422	2	0.17188	3	0.24188
22800	0	0.48212	2	0.24145	2	0.34569	1	0.13962	2	0.26286	3	0.24499	2	0.16943	3	0.24115
22850	1	0.47098	1	0.23803	2	0.34014	1	0.13907	2	0.25497	3	0.23556	2	0.16665	3	0.24591
22900	1	0.48184	1	0.24123	2	0.3452	1	0.14184	2	0.26241	3	0.24454	2	0.16893	3	0.24072
22950	0	0.47876	1	0.24149	2	0.34256	1	0.14214	2	0.25897	3	0.24059	2	0.17075	3	0.24414
23000	2	0.39229	1	0.24039	2	0.34353	2	0.14106	2	0.25924	3	0.24148	2	0.16851	3	0.24453
23050	1	0.48067	1	0.24135	2	0.34533	1	0.14167	2	0.26091	3	0.24339	2	0.16995	3	0.23896
23100	0	0.47776	1	0.23957	2	0.34477	1	0.13765	1	0.37857	3	0.24205	2	0.1738	3	0.24163
23150	0	0.48038	1	0.24138	2	0.34303	1	0.13993	1	0.38089	3	0.2427	2	0.17051	3	0.23921
23200	0	0.47569	1	0.23891	3	0.2974	1	0.13796	1	0.37662	3	0.23983	2	0.17163	3	0.24331
23250	0	0.47825	1	0.24144	3	0.29754	1	0.14369	1	0.37976	3	0.2401	2	0.17207	3	0.24073
23300	0	0.48568	1	0.24635	3	0.29879	1	0.14126	1	0.38875	3	0.24385	2	0.17059	3	0.23989
23350	0	0.47243	1	0.23766	3	0.29695	1	0.14211	1	0.37463	3	0.23815	2	0.17075	3	0.24369
23400	0	0.48743	1	0.24404	3	0.29776	1	0.14075	1	0.38677	3	0.24825	2	0.17001	3	0.24081
23450	0	0.4783	1	0.24081	3	0.29821	1	0.13997	1	0.38081	3	0.24057	2	0.16837	3	0.24441
23500	0	0.48256	1	0.24472	3	0.2968	1	0.14208	1	0.38475	3	0.24178	2	0.17318	3	0.24318
23550	0	0.47388	1	0.23973	2	0.30021	1	0.14153	1	0.37714	3	0.23642	2	0.17177	3	0.24357
23600	0	0.48376	1	0.24535	2	0.29956	1	0.13754	1	0.38585	3	0.242	2	0.17073	3	0.23854
23650	1	0.47448	1	0.23673	2	0.29699	1	0.14116	1	0.37325	2	0.2412	2	0.17136	3	0.24486
23700	0	0.47972	1	0.23937	2	0.29879	1	0.13841	1	0.37863	2	0.24372	2	0.1684	3	0.23764
23750	3	0.20029	1	0.2416	2	0.30031	1	0.14051	1	0.38057	2	0.24353	2	0.17136	3	0.24265
23800	1	0.47137	1	0.2371	2	0.29722	1	0.13807	1	0.37467	2	0.23692	2	0.17122	3	0.24117
23850	0	0.48096	1	0.24144	2	0.29694	1	0.1414	1	0.38048	2	0.24343	3	0.17269	3	0.24009
23900	0	0.47983	1	0.24033	2	0.3007	2	0.14116	1	0.38161	2	0.24269	2	0.16918	3	0.23951
23950	0	0.47684	1	0.23874	2	0.29569	2	0.139	1	0.37695	2	0.24166	2	0.1697	3	0.24395
24000	0	0.47327	1	0.23941	2	0.29853	1	0.14292	1	0.37665	2	0.23665	2	0.17084	3	0.23617
24050	0	0.4816	0	0.32825	2	0.29867	1	0.13831	1	0.38219	2	0.24323	2	0.17286	3	0.2449
24100	0	0.48449	0	0.33355	2	0.30052	1	0.1399	1	0.38621	2	0.24308	2	0.16845	3	0.24268
24150	1	0.48254	0	0.33113	2	0.29918	1	0.13983	1	0.38313	2	0.24258	2	0.17201	3	0.24443
24200	0	0.47196	0	0.32408	2	0.29805	1	0.13852	1	0.37504	2	0.23578	2	0.16803	3	0.24351
24250	0	0.47705	0	0.32215	2	0.29598	1	0.14268	1	0.37667	2	0.24231	2	0.17182	3	0.24302
24300	0	0.47885	0	0.32514	2	0.29771	1	0.13841	1	0.37999	2	0.24237	2	0.17199	3	0.24041
24350	0	0.47534	0	0.32807	2	0.29928	1	0.13642	1	0.37919	2	0.23725	2	0.17028	3	0.24671
24400	0	0.47839	0	0.32402	2	0.29791	3	0.13918	1	0.37822	2	0.24265	2	0.17114	3	0.24043
24450	1	0.48148	0	0.3312	2	0.30083	2	0.13921	0	0.38348	1	0.24132	2	0.16537	3	0.24301
24500	1	0.47793	0	0.32833	2	0.30029	2	0.14014	0	0.38022	1	0.23928	2	0.17185	3	0.24757
24550	0	0.4759	0	0.32585	2	0.29788	3	0.14099	0	0.37754	1	0.23913	2	0.17092	3	0.24252
24600	1	0.47876	0	0.32758	2	0.29863	3	0.1389	0	0.38117	1	0.24093	2	0.17464	3	0.23324
24650	0	0.47678	0	0.32426	2	0.2997	3	0.13747	0	0.37661	2	0.24022	2	0.1721	3	0.24269
24700	0	0.47786	0	0.32462	2	0.29877	3	0.14099	0	0.37864	2	0.24076	3	0.16915	3	0.24097
24750	0	0.46806	0	0.32013	2	0.29746	2	0.13952	1	0.37239	3	0.2345	3	0.17048	3	0.23671
24800	0	0.47809	0	0.32835	2	0.29966	2	0.14181	1	0.38029	3	0.23996	3	0.1699	3	0.24324
24850	1	0.39364	0	0.32659	2	0.29951	2	0.13911	1	0.37986	3	0.24243	3	0.17106	3	0.24267
24900	0	0.47911	0	0.32619	2	0.29869	2	0.1412	1	0.38048	3	0.24278	3	0.17152	3	0.23541
24950	0	0.47697	0	0.32758	2	0.29685	2	0.14123	1	0.37974	3	0.23951	3	0.1737	3	0.24416
25000	0	0.47857	0	0.32341	2	0.29919	2	0.13873	1	0.3777	3	0.24255	3	0.17138	3	0.24429
25050	0	0.47132	0	0.32488	2	0.29858	2	0.14075	1	0.37593	3	0.23519	3	0.17001	3	0.23585
25100	0	0.47987	0	0.32642	2	0.29564	2	0.14398	1	0.38061	3	0.2437	3	0.17248	3	0.2403
25150	0	0.47423	1	0.23557	2	0.29762	2	0.14027	1	0.37361	3	0.24084	3	0.17207	3	0.23886
25200	0	0.47888	1	0.24147	2	0.30237	1	0.14177	0	0.38003	2	0.24002	3	0.16923	3	0.24412
25250	0	0.47685	1	0.24047	2	0.29926	1	0.14174	1	0.37782	3	0.2398	3	0.17147	3	0.2452
25300	0	0.47896	1	0.23979	2	0.30078	1	0.13883	1	0.37923	3	0.24221	3	0.16993	3	0.24264
25350	0	0.48475	1	0.24547	2	0.29686	2	0.14315	1	0.38665	3	0.24351	3	0.17248	3	0.24397
25400	0	0.47371	1	0.24222	2	0.30044	2	0.13955	1	0.37981	3	0.23424	3	0.16744	3	0.23529
25450	0	0.47893	1	0.2433	2	0.29899	2	0.14228	1	0.38221	3	0.23961	3	0.17212	3	0.24739
25500	0	0.48356	1	0.24561	2	0.29748	2	0.14031	1	0.38645	3	0.2419	3	0.16954	3	0.23764
25550	0	0.48106	1	0.24343	2	0.29949	2	0.14065	1	0.38393	3	0.24168	3	0.17009	3	0.24464
25600	0	0.48436	1	0.24525	2	0.29887	2	0.13897	1	0.3861	3	0.24363	3	0.16943	3	0.24246
25650	0	0.47781	1	0.2436	3	0.29852	3	0.14075	1	0.38161	3	0.23772	3	0.16951	3	0.24113
25700	1	0.47697	1	0.24091	3	0.29946	3	0.14065	0	0.38014	2	0.23872	3	0.16948	3	0.23999
25750	0	0.47773	1	0.23993	3	0.29726	3	0.14099	0	0.37834	2	0.24162	3	0.16834	3	0.23966
25800	0	0.472	1	0.23797	3	0.29844	2	0.14385	0	0.37396	2	0.2368	3	0.17133	3	0.23956
25850	0	0.47393	1	0.23612	3	0.29664	2	0.1413	0	0.37347	2	0.24156	3	0.16909	3	0.23914
25900	0	0.48305	1	0.24413	3	0.29859	2	0.1417	0	0.38405	2	0.24305	3	0.1728	3	0.24098
25950	0	0.47931	1	0.24085	3	0.29636	3	0.14	0	0.38114	2	0.24236	3	0.1722	3	0.24212
26000	0	0.48265	1	0.24215	3	0.30001	2	0.13983	0	0.38107	2	0.24395	2	0.17163	3	0.24756
26050	0	0.47525	1	0.23957	3	0.29598	2	0.14298	0	0.37811	2	0.23933	2	0.16934	3	0.24567
26100	2	0.39089	1	0.2382	3	0.29828	2	0.13997	0	0.3769	2	0.24088	2	0.1707	3	0.23996
26150	0	0.47905	1	0.24017	3	0.29926	2	0.14082	0	0.38017	2	0.24187	2	0.16826	3	0.23802
26200	0	0.48123	1	0.24238	3	0.30007	2	0.13821	0	0.38138	1	0.24262	2	0.16973	3	0.23924
26250	0	0.48248	1	0.24535	3	0.29829	2	0.14126	0	0.38522	1	0.24146	2	0.17201	3	0.24736
26300	0	0.47924	1	0.24117	3	0.29788	3	0.14113	0	0.38068	1	0.24165	2	0.17174	3	0.24368
26350	0	0.48237	1	0.24336	3	0.30068	2	0.13841	0	0.38313	1	0.24282	3	0.17286	3	0.24482
26400	0	0.47813	1	0.24166	3	0.299	3	0.1401	0	0.38086	1	0.23996	3	0.1702	3	0.24065
26450	0	0.48444	1	0.24243	3	0.29703	2	0.13904	0	0.3842	1	0.24625	3	0.16981	3	0.24316
26500	0	0.47783	1	0.24101	3	0.29884	2	0.13719	0	0.37976	1	0.2401	3	0.17095	3	0.24616
26550	0	0.47903	1	0.23963	3	0.29994	2	0.14072	0	0.37861	1	0.2426	2	0.17201	3	0.24188
26600	1	0.47775	1	0.24255	2	0.34204	2	0.13952	0	0.38146	1	0.23934	2	0.17199	3	0.23634
26650	0	0.47883	1	0.24311	2	0.34293	2	0.13779	0	0.3817	1	0.23918	2	0.17302	3	0.24453
26700	0	0.46903	1	0.2356	2	0.3412	2	0.13997	0	0.37143	1	0.2361	2	0.171	3	0.24307
26750	1	0.39202	1	0.24483	2	0.34399	2	0.1415	0	0.38534	1	0.24153	3	0.1689	3	0.24428
26800	1	0.39269	1	0.24304	2	0.34465	2	0.14051	0	0.38254	1	0.24135	3	0.16976	3	0.24267
26850	1	0.47934	1	0.2442	2	0.34136	2	0.1374	0	0.38237	1	0.23845	2	0.17103	3	0.2413
26900	1	0.48156	1	0.24079	2	0.3447	2	0.14265	0	0.37987	1	0.24452	2	0.1702	3	0.23651
26950	0	0.47741	1	0.24074	2	0.34213	2	0.13959	0	0.37936	1	0.24007	2	0.16934	3	0.23997
27000	1	0.48203	1	0.24229	2	0.34565	3	0.13949	1	0.26166	1	0.24379	2	0.17095	3	0.24413
27050	1	0.48314	2	0.1728	2	0.34552	2	0.13966	1	0.26167	1	0.24451	2	0.17053	3	0.23976
27100	1	0.48033	2	0.1713	2	0.34366	2	0.14007	1	0.26117	1	0.24312	2	0.1716	3	0.23969
27150	0	0.47928	1	0.24213	2	0.34258	2	0.14245	1	0.25879	1	0.24129	2	0.17023	3	0.24061
27200	0	0.4813	1	0.2435	2	0.34252	3	0.13979	1	0.2603	2	0.24236	2	0.17122	3	0.24327
27250	0	0.46815	1	0.23614	2	0.33964	3	0.14292	1	0.25261	2	0.23428	2	0.16984	3	0.2361
27300	1	0.48571	2	0.2468	2	0.34359	3	0.13959	1	0.26125	2	0.24383	2	0.17185	3	0.23954
27350	1	0.47866	2	0.24206	2	0.34343	3	0.14058	2	0.25853	3	0.2403	2	0.17218	3	0.23678
27400	2	0.1954	2	0.23884	2	0.34396	3	0.13883	2	0.26169	3	0.24429	2	0.17169	3	0.2414
27450	0	0.47565	1	0.23885	2	0.34298	3	0.14068	2	0.25879	3	0.24037	2	0.17359	3	0.24003
27500	0	0.47619	1	0.2391	2	0.3426	3	0.14058	1	0.25877	2	0.2402	2	0.16998	3	0.23798
27550	0	0.484	1	0.24543	2	0.34414	3	0.13883	1	0.26059	2	0.24274	2	0.17006	3	0.23653
27600	0	0.47258	2	0.16945	2	0.33875	3	0.14238	1	0.25356	2	0.23672	2	0.16979	3	0.24321
27650	1	0.39611	2	0.17133	2	0.3454	3	0.14153	1	0.26184	2	0.24422	2	0.17023	3	0.24501
27700	1	0.38941	2	0.16912	2	0.34368	3	0.13803	2	0.25886	3	0.24108	2	0.16959	3	0.24409
27750	0	0.48195	1	0.24267	2	0.34414	3	0.14167	2	0.26106	3	0.24322	3	0.17453	3	0.24318
27800	2	0.39623	1	0.23794	2	0.34468	3	0.13918	2	0.26256	3	0.24484	2	0.17114	3	0.24503
27850	1	0.39188	0	0.32826	2	0.34252	3	0.13838	2	0.26062	3	0.24134	2	0.17089	3	0.24399
27900	1	0.39149	0	0.32067	2	0.34209	3	0.1415	2	0.25877	3	0.24031	2	0.17117	3	0.24205
27950	0	0.48118	0	0.33399	2	0.34353	3	0.13986	2	0.25814	3	0.23837	2	0.171	3	0.2405
28000	0	0.48256	0	0.33833	2	0.34153	3	0.13973	1	0.38833	3	0.23899	2	0.17324	3	0.24014
28050	0	0.47953	0	0.33099	2	0.34185	2	0.14113	1	0.38364	3	0.24051	2	0.17324	3	0.24625
28100	0	0.47226	0	0.31854	2	0.34057	2	0.14045	1	0.37197	3	0.23838	2	0.17259	3	0.23963
28150	1	0.48461	0	0.33544	2	0.34628	2	0.14017	1	0.3874	3	0.24192	2	0.17149	3	0.23744
28200	0	0.47533	0	0.32693	2	0.34188	2	0.13935	1	0.37861	3	0.238	2	0.17064	3	0.23625
28250	0	0.48069	0	0.33153	2	0.34344	2	0.13883	1	0.38374	3	0.24122	2	0.17089	3	0.24163
28300	0	0.46788	0	0.32022	2	0.33803	2	0.13789	1	0.37127	3	0.23475	2	0.1697	3	0.23874
28350	0	0.47306	0	0.32216	2	0.34052	3	0.13952	1	0.37548	3	0.23848	2	0.16984	3	0.24494
28400	1	0.47782	0	0.32331	2	0.34323	3	0.13973	1	0.37687	3	0.24207	2	0.1713	3	0.24511
28450	0	0.48605	0	0.33332	2	0.34513	3	0.13976	1	0.38624	3	0.2448	2	0.17223	3	0.23991
28500	0	0.47539	0	0.32686	2	0.3417	3	0.14103	1	0.37822	3	0.23809	2	0.1719	3	0.24044
28550	1	0.48298	1	0.33147	2	0.34417	3	0.14194	1	0.38436	3	0.24352	2	0.17138	3	0.24327
28600	0	0.48366	1	0.32863	2	0.34578	3	0.14147	1	0.38325	3	0.24478	2	0.17092	3	0.24143
28650	1	0.39039	1	0.32357	2	0.34308	3	0.14191	1	0.37761	3	0.2404	2	0.16912	3	0.24594
28700	1	0.39499	1	0.33038	2	0.34527	2	0.13966	1	0.38313	3	0.24302	2	0.16898	3	0.24114
28750	2	0.38421	2	0.24107	2	0.33933	3	0.13924	1	0.38011	3	0.23679	2	0.16901	3	0.24362
28800	2	0.39065	2	0.24096	2	0.34275	3	0.138	1	0.37979	3	0.24139	2	0.17283	3	0.23697
28850	2	0.39296	2	0.24297	2	0.343	3	0.13955	1	0.38094	3	0.24061	2	0.17103	3	0.24083
28900	0	0.48381	3	0.17294	2	0.34563	2	0.14024	1	0.38245	3	0.24455	2	0.16747	3	0.23998
28950	0	0.48166	1	0.24482	2	0.34243	2	0.13973	1	0.38448	3	0.24146	2	0.16943	3	0.24266
29000	1	0.47765	1	0.24068	2	0.3417	2	0.14027	2	0.25833	3	0.2408	2	0.16792	3	0.24013
29050	0	0.48286	0	0.33184	2	0.34488	2	0.13976	2	0.26167	3	0.24232	2	0.17026	3	0.23847
29100	1	0.47993	0	0.32543	2	0.34443	2	0.13883	2	0.26164	3	0.24358	2	0.17031	3	0.24145
29150	0	0.48086	0	0.32827	2	0.34382	2	0.13904	2	0.26058	3	0.24299	2	0.1689	3	0.24156
29200	0	0.48677	0	0.3357	2	0.34437	2	0.14109	2	0.26201	3	0.24405	2	0.17152	3	0.24152
29250	0	0.48158	0	0.33132	2	0.34292	3	0.14238	2	0.25983	3	0.24163	2	0.17413	3	0.24212
29300	0	0.47894	0	0.32912	2	0.34398	3	0.14201	2	0.25923	3	0.24062	2	0.1699	3	0.23996
29350	0	0.47599	0	0.32494	2	0.34247	3	0.13789	2	0.25846	3	0.24015	1	0.17128	3	0.24171
29400	1	0.47834	0	0.3267	2	0.3435	3	0.14235	2	0.25984	3	0.24121	2	0.17199	3	0.24611
29450	0	0.47194	0	0.32617	2	0.34177	3	0.13768	2	0.25383	3	0.23562	2	0.17117	3	0.24117
29500	0	0.4816	0	0.33144	2	0.3437	3	0.13893	2	0.25995	3	0.24125	2	0.17028	3	0.24165
29550	0	0.48488	0	0.3364	2	0.34228	3	0.1399	2	0.26085	3	0.24264	2	0.1745	3	0.24055
29600	0	0.48036	0	0.32567	2	0.34342	3	0.14055	2	0.2614	3	0.24398	2	0.17288	3	0.24111
29650	1	0.47744	0	0.32982	2	0.34002	3	0.13838	2	0.25717	3	0.23889	2	0.17001	3	0.23858
29700	0	0.486	0	0.33736	2	0.34389	3	0.14174	2	0.26009	3	0.24291	2	0.1697	3	0.24018
29750	0	0.48442	0	0.33087	2	0.34611	3	0.1401	2	0.26319	3	0.24455	2	0.17037	3	0.23795
29800	0	0.48594	0	0.33247	2	0.34365	3	0.1388	2	0.26258	3	0.24545	2	0.17103	3	0.24011
29850	0	0.47488	0	0.32333	2	0.34191	3	0.14017	2	0.25738	3	0.23868	2	0.17136	3	0.2366
29900	0	0.48043	0	0.32873	2	0.34417	3	0.13983	2	0.26091	3	0.24366	2	0.1689	3	0.24097
29950	0	0.4772	0	0.32099	2	0.34605	3	0.1414	2	0.26156	3	0.24269	2	0.16965	3	0.23577
30000	0	0.48465	0	0.33526	2	0.34389	3	0.13744	2	0.26082	3	0.24199	2	0.17188	3	0.23846
30050	0	0.48608	0	0.32895	2	0.34665	3	0.13859	2	0.26519	3	0.24735	2	0.16744	3	0.24659
30100	0	0.47442	0	0.32217	2	0.34145	3	0.14	2	0.25844	3	0.23991	2	0.16948	3	0.24014
30150	0	0.48341	0	0.33138	2	0.34357	3	0.14021	2	0.26109	2	0.37277	2	0.16932	3	0.24232
30200	0	0.48352	1	0.32893	2	0.34474	3	0.13831	2	0.26239	2	0.37164	2	0.17177	3	0.24099
30250	0	0.48808	1	0.34053	2	0.34379	3	0.14255	2	0.26145	2	0.38068	2	0.16957	3	0.23726
30300	0	0.48251	1	0.32648	2	0.3459	3	0.13952	2	0.26319	2	0.36992	2	0.17067	3	0.24511
30350	0	0.48716	1	0.33651	2	0.34652	3	0.13907	2	0.26255	1	0.37822	2	0.1702	3	0.23993
30400	0	0.47438	1	0.32605	2	0.34121	3	0.14086	2	0.25608	1	0.3662	2	0.16984	3	0.24022
30450	0	0.47617	1	0.32494	2	0.34164	3	0.14075	2	0.25814	1	0.36552	2	0.1741	3	0.24148
30500	0	0.4834	1	0.32986	2	0.34548	3	0.14096	2	0.26266	1	0.3722	2	0.17215	3	0.24223
30550	0	0.47814	1	0.32898	2	0.3419	3	0.13862	2	0.25775	1	0.36899	2	0.17125	3	0.23821
30600	0	0.48606	1	0.33349	2	0.34677	3	0.1401	2	0.26234	1	0.37528	2	0.17383	3	0.24
30650	0	0.48319	2	0.24217	2	0.34469	3	0.13986	1	0.26297	0	0.37066	2	0.17138	3	0.24287
30700	0	0.48244	2	0.24214	2	0.34289	2	0.13869	1	0.26291	0	0.36971	2	0.1722	3	0.24146
30750	0	0.47861	2	0.24194	2	0.34187	3	0.1373	1	0.25901	0	0.37025	2	0.17097	3	0.24407
30800	0	0.48019	2	0.24038	2	0.34521	3	0.13983	1	0.26153	0	0.36819	2	0.1689	3	0.24374
30850	0	0.48145	1	0.33013	2	0.34534	3	0.14034	1	0.26062	0	0.37112	3	0.16848	3	0.24555
30900	0	0.48582	2	0.24282	2	0.34717	3	0.1389	1	0.26517	0	0.37244	2	0.1699	3	0.24056
30950	0	0.48035	2	0.24305	2	0.34283	3	0.13817	1	0.25903	0	0.372	2	0.1689	3	0.23798
31000	0	0.47853	2	0.24244	2	0.34369	2	0.13782	1	0.258	0	0.36962	2	0.17056	3	0.24578
31050	0	0.47816	2	0.23886	2	0.34442	2	0.13945	1	0.26132	0	0.36596	2	0.17023	3	0.23845
31100	0	0.48178	2	0.24521	2	0.34228	2	0.14282	1	0.2587	0	0.37545	2	0.17188	3	0.23829
31150	1	0.48179	2	0.24426	2	0.34405	2	0.14027	1	0.25945	0	0.37184	2	0.16893	3	0.24334
31200	1	0.4812	2	0.24292	3	0.28998	2	0.14255	1	0.26121	0	0.37282	2	0.16778	3	0.24117
31250	0	0.47517	2	0.23806	3	0.29184	2	0.13914	1	0.25882	0	0.36385	2	0.1699	3	0.24429
31300	0	0.47469	2	0.2395	3	0.28997	2	0.14235	1	0.25685	1	0.36572	2	0.16798	3	0.24355
31350	0	0.47961	2	0.23942	2	0.34535	2	0.13866	1	0.26241	1	0.36641	2	0.16934	3	0.24212
31400	0	0.48662	2	0.24591	2	0.34523	3	0.1401	1	0.26339	1	0.3766	2	0.1719	3	0.24354
31450	0	0.47753	2	0.24222	2	0.34245	3	0.13831	1	0.25718	1	0.37025	2	0.17078	3	0.24079
31500	0	0.47904	2	0.24326	2	0.34196	3	0.13966	1	0.25748	1	0.3711	2	0.17248	3	0.24557
31550	0	0.48248	2	0.24432	3	0.29154	3	0.13841	1	0.26104	1	0.37304	2	0.17028	3	0.23944
31600	0	0.47834	2	0.23984	2	0.34367	3	0.13821	1	0.26015	1	0.36688	2	0.17048	3	0.24115
31650	1	0.47614	2	0.24029	2	0.34207	3	0.13886	1	0.2574	1	0.3665	2	0.17163	3	0.24221
31700	1	0.47919	2	0.24342	3	0.29238	3	0.1414	1	0.25812	1	0.37084	2	0.16918	3	0.24082
31750	1	0.48617	2	0.24353	3	0.29	3	0.14072	1	0.26447	1	0.37452	2	0.17042	3	0.24849
31800	0	0.4853	2	0.24615	3	0.29306	3	0.13942	1	0.26123	1	0.37672	2	0.17009	3	0.24213
31850	0	0.47796	2	0.24184	3	0.28758	3	0.13983	1	0.25719	1	0.36909	2	0.17491	3	0.24343
31900	0	0.48273	2	0.24523	2	0.3411	3	0.13807	2	0.2598	2	0.37327	2	0.16943	3	0.24463
31950	0	0.48365	2	0.24331	2	0.34411	3	0.14014	2	0.26311	3	0.14304	2	0.1725	3	0.24291
32000	0	0.48108	2	0.24236	2	0.34401	3	0.14208	2	0.26091	3	0.14103	2	0.17026	3	0.24562
32050	0	0.47871	2	0.24119	3	0.29203	3	0.14041	2	0.25958	3	0.14107	2	0.17149	3	0.23887
32100	0	0.47717	2	0.23735	3	0.29036	3	0.14099	2	0.26022	3	0.14007	3	0.17084	3	0.24229
32150	0	0.47705	3	0.16901	3	0.28978	3	0.14055	2	0.26029	3	0.13907	3	0.17048	3	0.24151
32200	1	0.39134	3	0.17056	3	0.29167	3	0.13976	2	0.26059	3	0.14121	3	0.16826	3	0.24318
32250	0	0.48186	3	0.17171	2	0.34251	3	0.14116	1	0.26059	2	0.14265	3	0.17215	3	0.24123
32300	1	0.38564	3	0.16865	2	0.34152	3	0.14288	1	0.2569	1	0.36754	3	0.16778	3	0.24476
32350	1	0.38987	3	0.1716	2	0.342	3	0.14075	1	0.25844	1	0.37228	2	0.17119	3	0.24308
32400	1	0.39139	2	0.241	2	0.34222	3	0.14147	1	0.25859	2	0.241	2	0.16998	3	0.24386
32450	1	0.39459	2	0.24458	2	0.34416	3	0.13924	2	0.26157	3	0.24398	2	0.16993	3	0.23789
32500	1	0.39121	2	0.24039	2	0.34229	3	0.14045	2	0.2583	3	0.23948	2	0.17138	3	0.2443
32550	1	0.39465	1	0.33299	3	0.29253	3	0.13814	2	0.26174	3	0.24344	2	0.17133	3	0.24418
32600	1	0.39016	0	0.32117	2	0.3432	3	0.14261	2	0.25857	3	0.23887	2	0.17064	3	0.24099
32650	1	0.39346	0	0.33071	2	0.34542	3	0.14079	1	0.26257	2	0.24313	2	0.16761	3	0.24174
32700	1	0.47572	0	0.3193	2	0.34346	3	0.14041	1	0.26004	2	0.2421	2	0.17248	3	0.24118
32750	2	0.39274	0	0.33496	2	0.34429	3	0.14003	1	0.26056	2	0.24352	2	0.17286	3	0.24263
32800	1	0.38656	0	0.32776	2	0.34077	3	0.13782	1	0.25633	2	0.23826	2	0.1704	3	0.24328
32850	1	0.39535	0	0.32934	2	0.3457	3	0.14038	1	0.26316	2	0.24537	2	0.17111	3	0.24312
32900	1	0.39247	0	0.32614	2	0.34388	3	0.14045	2	0.26239	2	0.24138	2	0.1744	3	0.24428
32950	1	0.38454	0	0.31806	3	0.28945	3	0.14034	2	0.25737	2	0.23664	2	0.17158	3	0.23967
33000	0	0.48414	0	0.33081	3	0.2934	3	0.13779	1	0.26317	2	0.2445	2	0.17009	3	0.24168
33050	0	0.47764	0	0.32547	3	0.29244	3	0.14245	1	0.25801	2	0.24074	2	0.16998	3	0.23911
33100	0	0.48254	0	0.32998	2	0.34465	3	0.13893	1	0.26132	3	0.14086	2	0.17067	3	0.24427
33150	0	0.48526	0	0.33618	2	0.34387	3	0.14204	1	0.26126	3	0.14318	2	0.16973	3	0.24362
33200	0	0.48291	0	0.33217	2	0.34299	3	0.14051	1	0.2605	3	0.14068	2	0.17064	3	0.24688
33250	0	0.47682	1	0.237	2	0.34459	3	0.13986	1	0.26075	3	0.13883	2	0.17023	3	0.24755
33300	0	0.48454	0	0.3352	2	0.34253	3	0.13768	1	0.26086	3	0.14265	2	0.17253	3	0.23864
33350	0	0.48327	0	0.33566	2	0.34372	3	0.13966	1	0.26001	3	0.14055	2	0.17111	3	0.23901
33400	0	0.47686	0	0.32461	2	0.34334	3	0.1381	1	0.25902	3	0.13845	2	0.17064	3	0.23913
33450	0	0.47794	1	0.24191	2	0.34175	3	0.14109	1	0.25815	3	0.13824	2	0.17356	3	0.24487
33500	0	0.4777	1	0.23878	2	0.34416	3	0.13949	1	0.25989	3	0.13969	2	0.16719	3	0.2395
33550	1	0.38863	1	0.23979	2	0.34309	3	0.13904	1	0.25801	3	0.13848	2	0.16865	3	0.23822
33600	1	0.39713	1	0.24292	2	0.34594	3	0.14174	1	0.26256	3	0.14194	2	0.17034	3	0.24267
33650	1	0.39348	1	0.24202	2	0.34264	3	0.13614	1	0.25991	3	0.14164	2	0.17015	3	0.24601
33700	2	0.38574	1	0.23965	2	0.34102	3	0.14086	1	0.25665	3	0.1389	2	0.17023	3	0.24381
33750	3	0.19905	1	0.2371	2	0.34433	3	0.13969	1	0.26115	3	0.13786	2	0.16976	3	0.24213
33800	3	0.19867	1	0.24153	2	0.3407	3	0.14136	1	0.2576	3	0.13993	2	0.17073	3	0.24176
33850	3	0.19917	1	0.24222	2	0.34167	3	0.14133	1	0.25885	2	0.24028	3	0.17062	3	0.23896
33900	2	0.1994	1	0.24224	2	0.34364	3	0.13938	1	0.25807	2	0.24073	3	0.16831	3	0.24615
33950	2	0.19778	0	0.33063	2	0.34186	3	0.14123	1	0.25789	2	0.24027	3	0.16789	3	0.24461
34000	1	0.39643	0	0.3268	2	0.34466	3	0.13716	1	0.26271	2	0.24491	3	0.17218	3	0.24141
34050	1	0.39324	0	0.32767	2	0.34328	3	0.13952	2	0.26003	3	0.24283	3	0.17064	3	0.24334
34100	1	0.38899	0	0.32272	2	0.34043	3	0.14014	2	0.2564	3	0.23892	3	0.17045	3	0.23961
34150	0	0.47726	0	0.32843	2	0.34184	3	0.14038	3	0.26066	3	0.23977	3	0.17231	3	0.24038
34200	0	0.48302	0	0.33242	2	0.34576	3	0.14007	3	0.26423	3	0.24247	3	0.1724	3	0.24226
34250	0	0.48189	0	0.3287	2	0.34344	3	0.14058	3	0.26427	3	0.24327	3	0.17097	3	0.24512
34300	1	0.39315	0	0.3345	2	0.3447	3	0.14103	3	0.26384	3	0.24292	3	0.17152	3	0.24129
34350	0	0.48033	0	0.32918	2	0.34398	3	0.14355	2	0.26013	3	0.24166	3	0.17272	3	0.24171
34400	0	0.48108	0	0.33216	3	0.29256	3	0.14058	2	0.25931	3	0.24167	3	0.17034	3	0.24055
34450	0	0.48079	0	0.33513	3	0.29418	3	0.13904	2	0.25799	3	0.23881	3	0.17092	3	0.23974
34500	1	0.39415	0	0.32767	2	0.34435	3	0.14041	2	0.2616	3	0.24397	3	0.17108	3	0.23881
34550	0	0.48129	1	0.2396	2	0.34579	3	0.14072	2	0.26255	4	0.14	3	0.17073	3	0.24133
34600	1	0.39233	0	0.31846	2	0.34476	3	0.14106	2	0.25994	4	0.1374	3	0.16951	3	0.2412
34650	1	0.39815	0	0.32987	2	0.34714	3	0.13698	2	0.26511	4	0.13918	3	0.17152	3	0.24115
34700	1	0.38866	0	0.33059	2	0.34155	3	0.13876	2	0.25787	4	0.14024	3	0.16806	3	0.24461
34750	0	0.48406	0	0.33138	2	0.34619	3	0.14308	2	0.26265	4	0.14027	3	0.17095	3	0.24411
34800	1	0.48139	1	0.24126	3	0.29225	3	0.14024	2	0.26176	4	0.13838	3	0.17256	3	0.24135
34850	1	0.47935	1	0.24314	3	0.29265	3	0.13782	2	0.25832	4	0.14103	3	0.17001	3	0.24054
34900	1	0.47907	1	0.24087	2	0.34173	3	0.1417	2	0.2605	4	0.14007	3	0.17086	3	0.24498
34950	1	0.48751	1	0.24602	2	0.34456	3	0.14116	2	0.26329	4	0.14231	3	0.17218	3	0.23667
35000	1	0.48162	1	0.24378	2	0.34421	3	0.14153	2	0.26054	4	0.14116	3	0.16859	3	0.2404
35050	1	0.47568	1	0.24201	2	0.34018	3	0.1414	1	0.25524	3	0.14075	3	0.17103	3	0.23537
35100	1	0.4816	1	0.24311	3	0.28926	3	0.13883	1	0.26146	3	0.13986	3	0.1728	3	0.23862
35150	2	0.39408	1	0.24114	3	0.29242	3	0.1388	1	0.26196	3	0.13921	3	0.16948	3	0.24034
35200	2	0.38894	1	0.24303	3	0.29364	3	0.14048	1	0.25796	3	0.14123	3	0.16909	3	0.2414
35250	1	0.48325	1	0.2426	3	0.29392	3	0.13959	1	0.26278	2	0.24398	3	0.17245	3	0.24031
35300	2	0.38722	1	0.2445	3	0.29235	3	0.14133	1	0.25671	2	0.23839	3	0.17067	3	0.23985
35350	2	0.39235	1	0.23862	3	0.29206	3	0.14278	1	0.25983	2	0.24112	3	0.1702	3	0.23956
35400	2	0.38657	1	0.23384	3	0.29065	3	0.1416	1	0.25526	2	0.23663	3	0.17092	3	0.24437
35450	1	0.39255	1	0.23957	3	0.29158	3	0.13751	1	0.26014	2	0.24151	3	0.17245	3	0.24508
35500	0	0.48084	1	0.24346	3	0.29329	3	0.14342	1	0.25931	2	0.24148	3	0.16965	3	0.24068
35550	0	0.48395	1	0.24477	2	0.34471	3	0.13638	1	0.26139	2	0.24406	3	0.17081	3	0.24607
35600	1	0.39444	0	0.3327	2	0.34564	3	0.13852	1	0.26139	2	0.2446	3	0.16962	3	0.23769
35650	0	0.48107	0	0.32975	2	0.34276	3	0.14153	1	0.26045	2	0.24226	3	0.17138	3	0.2427
35700	0	0.48396	0	0.32979	2	0.34603	3	0.1399	1	0.26326	2	0.2445	3	0.17053	3	0.23794
35750	0	0.4801	0	0.32531	2	0.34322	3	0.13949	1	0.26158	2	0.24328	3	0.17242	3	0.23922
35800	0	0.47671	0	0.32906	2	0.34107	3	0.13824	1	0.25693	2	0.23868	3	0.16987	3	0.24408
35850	0	0.47344	0	0.33001	3	0.2933	3	0.1389	1	0.25323	2	0.23507	3	0.17095	3	0.24453
35900	0	0.47974	0	0.32742	3	0.29123	3	0.14184	1	0.26017	2	0.24218	3	0.16845	3	0.23713
35950	1	0.39323	0	0.32938	2	0.34293	3	0.13779	1	0.25948	2	0.2425	2	0.17051	3	0.24301
36000	0	0.48376	0	0.33377	2	0.34435	3	0.13949	1	0.26084	2	0.24337	2	0.17394	3	0.24379
36050	0	0.47937	0	0.33185	2	0.34216	3	0.14038	1	0.25821	2	0.23955	2	0.17196	3	0.24252
36100	0	0.47687	0	0.32659	2	0.34213	3	0.13768	1	0.25918	2	0.24071	2	0.17144	3	0.24451
36150	0	0.48348	0	0.33266	2	0.34419	3	0.14079	1	0.26112	2	0.24298	2	0.1682	3	0.24148
36200	1	0.38822	0	0.32582	2	0.34216	3	0.13997	2	0.26145	2	0.23929	2	0.16926	3	0.23842
36250	1	0.48349	0	0.33538	2	0.34427	3	0.13959	2	0.26309	2	0.24101	2	0.16984	3	0.23861
36300	1	0.4823	0	0.33057	2	0.3439	3	0.1412	2	0.26373	2	0.2429	2	0.1713	3	0.23995
36350	1	0.47883	0	0.32624	2	0.3435	3	0.14092	2	0.26283	2	0.14004	2	0.17111	3	0.23665
36400	1	0.48416	0	0.33249	2	0.34557	3	0.13897	2	0.26437	2	0.14248	2	0.17229	3	0.24505
36450	1	0.47963	0	0.3239	2	0.34549	3	0.14092	2	0.26435	2	0.14251	2	0.16845	3	0.23953
36500	0	0.4792	0	0.32942	2	0.34302	3	0.13979	2	0.26216	2	0.14213	2	0.17064	3	0.24357
36550	0	0.48226	0	0.32799	2	0.34453	3	0.13862	2	0.26549	2	0.13964	2	0.17138	3	0.24047
36600	0	0.47944	1	0.24381	2	0.34262	3	0.13966	2	0.26066	2	0.1436	2	0.17026	3	0.23977
36650	0	0.48372	1	0.24245	2	0.34656	3	0.14282	2	0.26661	2	0.14039	2	0.17399	3	0.24059
36700	0	0.48492	1	0.24452	2	0.34586	3	0.13949	2	0.2658	2	0.14181	2	0.1689	3	0.23975
36750	0	0.48138	1	0.24424	2	0.34324	3	0.14003	3	0.26253	3	0.14241	2	0.16926	3	0.24531
36800	0	0.48028	1	0.24229	2	0.34273	3	0.13754	3	0.26266	3	0.14156	2	0.17122	3	0.23776
36850	0	0.47884	1	0.24241	2	0.34256	3	0.14065	3	0.26092	3	0.14286	2	0.17075	3	0.23889
36900	1	0.38887	1	0.23981	2	0.34133	3	0.14	3	0.25929	3	0.14156	2	0.17084	3	0.24026
36950	1	0.38768	1	0.24147	2	0.34097	3	0.14072	2	0.25685	3	0.14195	2	0.17351	3	0.23575
37000	1	0.39832	1	0.24491	2	0.3461	3	0.13726	1	0.26409	2	0.14367	2	0.1697	3	0.23637
37050	1	0.3917	1	0.24057	2	0.34311	3	0.13852	1	0.25915	2	0.14234	2	0.17155	3	0.24432
37100	1	0.3917	1	0.24505	2	0.34326	3	0.13997	2	0.26024	3	0.14209	2	0.16881	3	0.23909
37150	1	0.39119	1	0.24458	2	0.34284	3	0.14021	2	0.26055	3	0.14216	2	0.1702	3	0.24059
37200	1	0.39518	1	0.24442	2	0.34536	3	0.14136	1	0.2624	2	0.1423	2	0.17177	3	0.24513
37250	1	0.38535	1	0.23712	2	0.341	3	0.13928	1	0.2548	1	0.36266	2	0.16948	3	0.24141
37300	1	0.39063	1	0.24114	2	0.34165	3	0.13824	1	0.25912	1	0.36837	2	0.17078	3	0.24241
37350	1	0.39204	1	0.24492	2	0.34289	3	0.1416	1	0.2597	1	0.37276	2	0.17302	3	0.24316
37400	1	0.3943	1	0.24076	2	0.34399	3	0.14164	2	0.26067	2	0.36808	2	0.16948	3	0.24049
37450	1	0.38854	1	0.23796	2	0.34259	3	0.14021	2	0.25763	3	0.14004	2	0.16682	3	0.24329
37500	1	0.39441	1	0.24306	2	0.34399	3	0.13779	2	0.26149	3	0.14244	2	0.17004	3	0.24233
37550	1	0.39817	1	0.24393	2	0.34622	3	0.13973	2	0.26364	3	0.143	2	0.17009	3	0.24198
37600	1	0.39208	1	0.24273	2	0.34476	3	0.14024	2	0.26169	3	0.14014	2	0.16923	3	0.24291
37650	1	0.39101	1	0.24372	2	0.34312	3	0.13869	2	0.25892	3	0.14433	2	0.17108	3	0.24388
37700	1	0.3921	1	0.23609	2	0.34245	3	0.14007	2	0.25878	2	0.36114	2	0.17067	3	0.23973
37750	1	0.39102	1	0.24137	2	0.34325	3	0.1388	2	0.25938	2	0.36873	2	0.1722	3	0.24205
37800	2	0.20082	1	0.23993	2	0.34484	3	0.13955	1	0.25965	1	0.36716	2	0.17199	3	0.24261
37850	2	0.38994	1	0.24551	2	0.34304	3	0.1388	2	0.25855	3	0.14426	2	0.16767	3	0.24193
37900	1	0.47655	1	0.23897	2	0.34304	3	0.14251	2	0.25941	3	0.13889	2	0.17138	3	0.24276
37950	1	0.48385	1	0.24138	2	0.34703	4	0.14079	2	0.26474	2	0.3702	2	0.17432	3	0.24118
38000	1	0.47544	1	0.24139	2	0.34217	4	0.14082	2	0.25572	2	0.36855	2	0.17084	3	0.23847
38050	1	0.47982	1	0.24042	2	0.34438	3	0.14177	1	0.26113	1	0.36859	2	0.17037	3	0.23995
38100	1	0.48389	1	0.24397	2	0.34394	3	0.13928	1	0.26162	1	0.37223	2	0.1694	3	0.24329
38150	1	0.47873	1	0.24128	2	0.34299	3	0.14017	1	0.25885	1	0.36856	2	0.17086	3	0.24246
38200	1	0.48553	1	0.2444	2	0.34764	3	0.13952	1	0.26385	2	0.14286	2	0.16862	3	0.24182
38250	1	0.48116	1	0.24205	2	0.34516	3	0.13744	1	0.26121	2	0.14321	2	0.1694	3	0.24181
38300	1	0.47576	1	0.24092	2	0.34125	4	0.13596	2	0.25553	3	0.14248	2	0.16814	3	0.24036
38350	2	0.38764	1	0.24382	2	0.34155	4	0.1389	1	0.2584	2	0.14177	2	0.171	3	0.24372
38400	1	0.48313	1	0.24502	2	0.34486	4	0.13873	2	0.264	2	0.14307	2	0.17006	3	0.24061
38450	2	0.19523	1	0.24468	2	0.34185	4	0.14103	2	0.26104	2	0.14436	2	0.1697	3	0.24342
38500	1	0.47957	1	0.24222	2	0.34377	4	0.1373	2	0.26285	2	0.14181	2	0.17078	3	0.24242
38550	1	0.48195	1	0.24193	2	0.34475	4	0.14079	2	0.26489	1	0.37005	2	0.16968	3	0.24757
38600	1	0.47796	0	0.32724	2	0.34093	3	0.14174	2	0.26178	1	0.36841	2	0.1699	3	0.24253
38650	0	0.48172	0	0.32542	2	0.34539	3	0.1399	2	0.26547	1	0.36884	2	0.17095	3	0.23885
38700	0	0.48626	0	0.33521	2	0.34589	3	0.13928	2	0.26515	1	0.37615	2	0.17185	3	0.24042
38750	0	0.47691	0	0.32073	2	0.34451	3	0.14007	2	0.26369	1	0.36435	3	0.17042	3	0.23663
38800	0	0.48337	0	0.32511	2	0.34509	3	0.14072	2	0.26677	1	0.3693	3	0.16792	3	0.24637
38850	0	0.4773	0	0.3247	1	0.34368	3	0.14072	2	0.26178	1	0.36637	3	0.17081	3	0.2432
38900	1	0.47663	0	0.32721	1	0.34221	3	0.139	2	0.26116	0	0.36797	3	0.16979	3	0.24068
38950	1	0.47951	0	0.32255	1	0.34588	3	0.14045	2	0.26566	1	0.36689	3	0.16915	3	0.24221
39000	1	0.47857	0	0.33213	1	0.34049	3	0.14082	2	0.25996	1	0.37115	3	0.17237	3	0.24457
39050	1	0.48288	0	0.3292	1	0.3458	3	0.13869	3	0.2661	2	0.37192	3	0.16812	3	0.24416
39100	0	0.48131	0	0.32595	1	0.34565	3	0.1389	3	0.26504	2	0.3684	3	0.17117	3	0.24175
39150	0	0.47315	0	0.32577	1	0.34133	3	0.14147	2	0.25799	1	0.3656	3	0.17064	3	0.23924
39200	0	0.48295	0	0.33309	1	0.3436	3	0.13831	2	0.26407	1	0.37428	3	0.16932	3	0.24024
39250	0	0.48567	0	0.33232	1	0.34602	3	0.14325	2	0.26632	1	0.3749	3	0.16932	3	0.23911
39300	0	0.4813	0	0.33196	1	0.34301	3	0.13966	3	0.17073	1	0.37262	3	0.17064	3	0.23806
39350	0	0.47904	0	0.32371	1	0.34395	3	0.13918	3	0.16943	1	0.36679	4	0.17081	3	0.24703
39400	0	0.47833	0	0.32634	1	0.34126	3	0.13841	3	0.17117	1	0.36731	4	0.17215	3	0.23949
39450	0	0.47433	0	0.33009	1	0.33982	3	0.14258	3	0.16923	1	0.36849	4	0.17108	3	0.24465
39500	1	0.48266	0	0.33222	1	0.34401	3	0.14072	3	0.17081	1	0.37347	4	0.16881	3	0.24103
39550	1	0.48426	0	0.32936	1	0.34519	3	0.13955	3	0.17302	1	0.37175	4	0.17169	3	0.24782
39600	0	0.47984	0	0.32685	1	0.34396	3	0.1401	3	0.1699	1	0.36912	4	0.17092	3	0.23878
39650	0	0.47969	0	0.32759	1	0.34451	3	0.14014	3	0.16984	1	0.36942	4	0.17169	3	0.24477
39700	0	0.47701	0	0.3221	1	0.3439	3	0.13955	3	0.16786	1	0.36539	4	0.1707	3	0.24185
39750	0	0.47829	0	0.33015	1	0.342	3	0.14072	3	0.17097	1	0.37018	4	0.16831	3	0.24543
39800	0	0.47735	0	0.32879	1	0.34268	3	0.13997	3	0.1716	1	0.36878	4	0.17078	3	0.24287
39850	0	0.48018	0	0.3255	1	0.34392	3	0.14058	2	0.26481	1	0.36806	4	0.16973	3	0.2465
39900	0	0.48311	0	0.33041	1	0.3447	3	0.14099	2	0.26418	1	0.37222	4	0.16948	3	0.24163
39950	0	0.47988	0	0.33284	1	0.34058	3	0.13831	2	0.26029	1	0.37213	4	0.171	3	0.24036
40000	1	0.39087	0	0.32891	1	0.34291	3	0.13848	2	0.26266	1	0.36993	3	0.1722	3	0.2471
40050	2	0.39631	0	0.33014	1	0.34699	3	0.14241	2	0.26584	1	0.3724	3	0.16987	3	0.2404
40100	2	0.39227	0	0.33326	1	0.3438	3	0.13876	2	0.26319	2	0.14436	3	0.17062	3	0.23903
40150	2	0.39325	0	0.32844	1	0.34205	3	0.13855	2	0.26018	3	0.14251	3	0.17226	3	0.24388
40200	2	0.3921	1	0.24049	1	0.34292	3	0.14024	2	0.25961	3	0.14177	3	0.16926	3	0.24172
40250	2	0.38827	1	0.2437	1	0.34211	3	0.13786	2	0.25765	3	0.143	2	0.17103	3	0.24605
40300	2	0.39325	2	0.17201	1	0.34296	3	0.14116	2	0.26047	3	0.14349	2	0.16879	3	0.24224
40350	1	0.47336	3	0.16831	1	0.34097	3	0.13962	2	0.2563	3	0.13914	2	0.17086	3	0.24117
40400	1	0.48216	2	0.24052	1	0.34703	3	0.14312	2	0.26323	3	0.14156	2	0.16915	3	0.24397
40450	2	0.19706	2	0.24475	1	0.34282	3	0.14051	2	0.26066	3	0.14234	2	0.16848	3	0.24451
40500	2	0.19666	2	0.24163	1	0.3441	3	0.13852	2	0.26154	3	0.14167	2	0.17114	3	0.23853
40550	2	0.19771	2	0.24035	2	0.34329	3	0.14048	2	0.25922	3	0.13989	2	0.17212	3	0.23983
40600	2	0.19757	2	0.2443	2	0.3456	3	0.13716	2	0.26189	3	0.14384	2	0.1704	3	0.24225
40650	2	0.19598	2	0.24143	2	0.34494	3	0.13834	2	0.26145	3	0.14177	3	0.16691	3	0.24098
40700	1	0.48242	2	0.24177	1	0.34534	3	0.13834	2	0.26285	3	0.14054	3	0.1713	3	0.24159
40750	1	0.47978	2	0.24335	1	0.34216	3	0.13938	2	0.25773	3	0.14255	3	0.17329	3	0.23886
40800	1	0.48187	2	0.24312	2	0.34383	3	0.14082	3	0.26444	3	0.14244	3	0.17006	3	0.24755
40850	1	0.48034	2	0.24155	2	0.34351	3	0.14092	3	0.26354	3	0.14206	3	0.17201	3	0.24127
40900	1	0.48066	2	0.24284	2	0.34231	3	0.14157	2	0.26025	2	0.37068	3	0.17302	3	0.24136
40950	1	0.49014	2	0.2496	2	0.34628	3	0.14041	2	0.26312	2	0.38105	3	0.17171	3	0.24224
41000	1	0.4763	2	0.23808	2	0.34284	3	0.13796	2	0.25935	3	0.24089	2	0.1692	3	0.24682
41050	0	0.47181	2	0.23846	2	0.33964	3	0.13782	2	0.25527	3	0.23581	2	0.17174	3	0.24378
41100	0	0.48035	3	0.17081	2	0.34345	3	0.13761	2	0.25997	3	0.2406	2	0.17332	3	0.24053
41150	1	0.47636	3	0.16976	2	0.34077	3	0.1417	2	0.2557	3	0.23829	2	0.16926	3	0.24223
41200	1	0.47817	3	0.17108	2	0.34074	3	0.13997	2	0.25729	3	0.2394	2	0.16837	3	0.24052
41250	1	0.47823	3	0.16979	2	0.34652	3	0.14014	2	0.26251	3	0.24454	2	0.17114	3	0.23983
41300	1	0.48331	3	0.17136	2	0.34482	3	0.14342	2	0.26083	3	0.2428	2	0.16965	3	0.241
41350	1	0.47986	3	0.17174	2	0.34278	3	0.14305	2	0.25948	3	0.24162	3	0.16884	3	0.24592
41400	1	0.47863	3	0.17095	2	0.34051	3	0.1412	2	0.25649	3	0.23857	3	0.1724	3	0.24637
41450	1	0.48223	3	0.17171	2	0.3455	3	0.13976	2	0.26198	3	0.24292	3	0.16873	3	0.23978
41500	0	0.47884	3	0.17062	2	0.34409	3	0.13677	2	0.261	3	0.24271	3	0.17278	3	0.23925
41550	1	0.3955	3	0.17218	2	0.34434	3	0.13986	2	0.26187	3	0.24348	2	0.17212	3	0.23884
41600	1	0.39112	2	0.24424	2	0.34175	3	0.1399	2	0.25918	3	0.24099	3	0.16837	3	0.23573
41650	1	0.40272	2	0.24529	2	0.34803	3	0.13952	1	0.26592	2	0.24889	3	0.1722	3	0.24286
41700	1	0.38973	2	0.23973	2	0.34285	3	0.13966	1	0.25771	2	0.23985	3	0.16909	3	0.24299
41750	2	0.39389	2	0.23649	2	0.34216	3	0.14045	1	0.25927	2	0.2415	3	0.16993	3	0.24296
41800	1	0.47933	2	0.2382	3	0.29197	3	0.13897	1	0.26224	2	0.2439	3	0.17081	3	0.24363
41850	0	0.48592	1	0.33076	2	0.34639	3	0.14041	1	0.2636	2	0.24722	3	0.16733	3	0.23862
41900	0	0.47737	1	0.32865	2	0.34036	3	0.13841	2	0.2601	2	0.2392	3	0.16784	3	0.24485
41950	0	0.47583	1	0.32246	2	0.34331	3	0.1413	2	0.2622	2	0.24047	3	0.17166	3	0.24824
42000	0	0.48081	1	0.32754	2	0.34537	3	0.13883	2	0.26478	2	0.2431	3	0.17343	3	0.24095
42050	0	0.484	1	0.33205	2	0.34488	3	0.1401	2	0.26561	2	0.24463	3	0.17163	3	0.24581
42100	1	0.48062	1	0.33546	2	0.34114	3	0.14062	2	0.26031	2	0.23874	3	0.17064	3	0.23782
42150	1	0.47913	1	0.32423	2	0.34311	3	0.14191	2	0.26319	2	0.24274	3	0.17335	3	0.24202
42200	1	0.47018	1	0.32087	2	0.34013	3	0.13952	2	0.25643	2	0.23608	3	0.17125	3	0.24923
42250	1	0.47684	3	0.14058	2	0.34373	3	0.1399	2	0.26301	2	0.2413	3	0.1684	3	0.24537
42300	0	0.47737	3	0.13866	2	0.34266	3	0.14007	3	0.26109	3	0.23991	3	0.17122	3	0.24017
42350	0	0.48074	3	0.14024	2	0.34517	3	0.13914	3	0.26341	3	0.24215	3	0.1689	3	0.24294
42400	0	0.4867	3	0.14265	2	0.34501	3	0.14106	3	0.26679	3	0.24547	3	0.17117	3	0.24166
42450	0	0.47707	3	0.14153	2	0.34467	3	0.13986	3	0.26372	3	0.24246	3	0.17103	3	0.24344
42500	0	0.47989	3	0.14143	2	0.34453	3	0.13983	3	0.26441	3	0.24317	3	0.16959	3	0.23812
42550	2	0.19497	3	0.13866	2	0.34355	3	0.13945	3	0.26298	3	0.24255	4	0.17293	3	0.24361
42600	0	0.47501	3	0.13705	2	0.34312	3	0.14174	3	0.26043	3	0.23905	4	0.17071	3	0.24048
42650	0	0.48026	3	0.1401	2	0.34572	3	0.14041	3	0.26413	3	0.24297	4	0.17464	3	0.24261
42700	0	0.48294	3	0.14245	2	0.3449	3	0.14092	3	0.26517	3	0.24391	4	0.17509	3	0.23989
42750	1	0.39154	3	0.14051	2	0.34281	3	0.14003	3	0.26165	3	0.24	4	0.17412	3	0.23929
42800	1	0.39415	3	0.14147	2	0.34381	3	0.13719	3	0.26338	3	0.24304	4	0.17175	3	0.2405
42850	2	0.39346	3	0.1412	2	0.34356	3	0.14089	3	0.26359	3	0.24233	4	0.17198	3	0.2407
42900	2	0.38941	3	0.13817	2	0.34241	3	0.14034	4	0.16979	3	0.24084	3	0.16959	3	0.23964
42950	2	0.38914	4	0.17154	2	0.34234	3	0.13942	4	0.17053	3	0.239	3	0.17141	3	0.23755
43000	1	0.3914	4	0.17389	2	0.34278	3	0.13876	4	0.171	3	0.2415	3	0.17119	3	0.24499
43050	1	0.38978	4	0.17278	2	0.34289	3	0.14072	4	0.17188	3	0.23944	4	0.172	3	0.23888
43100	1	0.38804	4	0.17195	2	0.34328	3	0.13848	4	0.17084	3	0.23868	4	0.17353	3	0.24349
43150	1	0.3942	4	0.17146	2	0.34463	3	0.13575	3	0.26397	3	0.2435	4	0.17704	3	0.24054
43200	1	0.39659	4	0.17496	2	0.34488	3	0.14106	3	0.26516	3	0.24407	4	0.17308	3	0.24006
43250	2	0.39652	4	0.17444	2	0.34597	3	0.13979	3	0.26566	3	0.2455	4	0.17155	3	0.24405
43300	2	0.39384	4	0.17265	2	0.34476	3	0.14181	3	0.26391	3	0.24205	4	0.17355	3	0.24321
43350	0	0.47144	4	0.17018	2	0.33932	3	0.13893	3	0.25963	3	0.23848	3	0.17023	3	0.24074
43400	0	0.48589	4	0.17463	2	0.34614	3	0.13907	2	0.26287	3	0.24362	3	0.17158	3	0.23837
43450	0	0.47646	4	0.17191	2	0.34296	3	0.14038	2	0.25914	3	0.24035	3	0.17125	3	0.24327
43500	0	0.4772	4	0.1717	2	0.34288	3	0.13775	2	0.25901	3	0.24116	3	0.16948	3	0.24173
43550	0	0.48097	4	0.17227	2	0.34478	3	0.13976	2	0.26048	3	0.24114	3	0.17009	3	0.2452
43600	0	0.485	4	0.17542	2	0.34548	3	0.14092	2	0.26251	3	0.24441	3	0.17073	3	0.2443
43650	1	0.48177	4	0.173	2	0.34488	3	0.14136	2	0.26099	3	0.24254	3	0.17149	3	0.24158
43700	0	0.48088	4	0.17296	2	0.34415	3	0.139	2	0.26039	3	0.2424	3	0.1684	3	0.24501
43750	0	0.4848	3	0.14224	2	0.34565	3	0.13959	2	0.26368	3	0.24585	3	0.1719	3	0.24079
43800	1	0.27689	3	0.14021	2	0.34305	3	0.1388	2	0.26047	3	0.2432	3	0.17045	3	0.24266
43850	1	0.27755	2	0.171	2	0.34326	3	0.14258	1	0.26096	2	0.24237	3	0.16976	3	0.23497
43900	1	0.27695	2	0.17059	2	0.34428	3	0.14031	1	0.2618	2	0.24371	3	0.16976	3	0.24391
43950	1	0.27326	2	0.16761	2	0.33857	3	0.14068	1	0.25396	2	0.23593	3	0.16764	3	0.24721
44000	2	0.27935	2	0.1731	2	0.34653	3	0.13821	1	0.26467	2	0.24597	3	0.17329	3	0.24146
44050	2	0.27618	2	0.17009	2	0.34346	3	0.14062	1	0.26039	2	0.24259	3	0.1692	3	0.24079
44100	2	0.27659	2	0.17053	2	0.34296	3	0.14164	1	0.2606	2	0.24205	3	0.16884	3	0.24716
44150	2	0.27564	2	0.16959	2	0.34386	3	0.13997	1	0.25978	2	0.24164	3	0.17335	3	0.24325
44200	2	0.27886	2	0.17188	2	0.34398	3	0.14194	1	0.25939	2	0.24117	2	0.1721	3	0.24178
44250	2	0.27396	3	0.13918	2	0.34265	3	0.14113	1	0.25874	2	0.24165	2	0.16724	3	0.236
44300	1	0.27541	3	0.13938	2	0.34373	3	0.14003	1	0.2599	2	0.24217	2	0.17051	3	0.2362
44350	1	0.2764	2	0.17084	2	0.33971	3	0.14245	1	0.25741	2	0.23892	2	0.17356	3	0.23943
44400	1	0.27903	2	0.1724	2	0.34629	3	0.13897	1	0.26443	2	0.24625	2	0.17075	3	0.23863
44450	1	0.27417	2	0.16951	2	0.34169	3	0.14208	1	0.25784	2	0.24037	2	0.17226	3	0.24348
44500	1	0.27368	3	0.13817	2	0.34127	3	0.14194	1	0.25853	2	0.23964	2	0.17259	3	0.23965
44550	1	0.27611	3	0.14017	2	0.3406	3	0.13942	1	0.25648	2	0.23937	2	0.17286	3	0.24242
44600	1	0.27503	3	0.1412	2	0.34483	3	0.13907	1	0.26427	2	0.24631	3	0.16951	3	0.23959
44650	2	0.27498	3	0.13955	2	0.34403	3	0.14086	1	0.25799	2	0.24058	3	0.16884	3	0.24205
44700	2	0.27209	3	0.13543	2	0.34032	2	0.1412	1	0.25463	2	0.23571	3	0.17045	3	0.24481
44750	2	0.28015	3	0.14241	2	0.34628	3	0.13986	2	0.26271	3	0.2447	2	0.17023	3	0.24152
44800	2	0.27246	3	0.13897	1	0.43757	3	0.13942	2	0.25891	4	0.13758	2	0.1704	3	0.24274
44850	1	0.27718	3	0.14086	1	0.43894	3	0.14086	2	0.25918	4	0.14099	2	0.17316	3	0.24193
44900	1	0.27886	3	0.14157	1	0.44229	3	0.14106	2	0.2636	4	0.14048	2	0.16845	3	0.23939
44950	1	0.27384	3	0.13945	1	0.43994	3	0.13824	2	0.26086	4	0.13859	2	0.17106	3	0.24136
45000	2	0.27914	3	0.13859	1	0.44382	3	0.13841	2	0.26088	4	0.13976	2	0.16937	3	0.24538
45050	1	0.27279	4	0.2415	1	0.4387	3	0.14385	2	0.25831	3	0.24041	2	0.17231	3	0.23918
45100	1	0.27695	4	0.17455	1	0.44433	3	0.13983	2	0.26137	3	0.24333	2	0.16987	3	0.24481
45150	1	0.27873	4	0.17558	1	0.44398	3	0.14103	2	0.26232	3	0.24504	2	0.17383	3	0.23539
45200	1	0.2769	4	0.17281	1	0.43527	3	0.14068	2	0.26025	3	0.24259	2	0.16957	3	0.2425
45250	2	0.28071	4	0.17351	1	0.43964	3	0.13789	2	0.25824	3	0.24065	3	0.17138	3	0.24063
45300	2	0.28129	4	0.17397	1	0.44009	3	0.13969	2	0.25913	3	0.24144	3	0.17147	3	0.24045
45350	2	0.27826	4	0.17071	1	0.43606	3	0.13924	2	0.25653	3	0.23832	3	0.17253	3	0.239
45400	2	0.28273	3	0.14238	1	0.43767	3	0.13997	2	0.26181	3	0.24382	2	0.17086	3	0.2396
45450	2	0.278	3	0.14048	1	0.43762	3	0.14375	2	0.25989	3	0.24255	2	0.16995	3	0.23861
45500	3	0.28383	4	0.17739	1	0.44923	3	0.14058	2	0.26402	3	0.24609	2	0.16962	3	0.24072
45550	2	0.28193	4	0.17331	1	0.43666	3	0.14007	2	0.26213	4	0.13924	2	0.17108	3	0.23986
45600	2	0.27651	4	0.17059	1	0.43801	3	0.14031	2	0.2563	4	0.13876	2	0.1707	3	0.23775
45650	2	0.27998	4	0.17405	1	0.442	3	0.14258	2	0.2617	4	0.14075	2	0.17125	3	0.24108
45700	2	0.27904	4	0.17231	1	0.43665	3	0.14096	2	0.25784	4	0.14007	2	0.17004	3	0.24206
45750	2	0.28025	4	0.17327	1	0.44053	3	0.14123	2	0.26268	4	0.13921	2	0.16995	3	0.24198
45800	2	0.28005	4	0.17147	1	0.4353	3	0.14157	2	0.25478	4	0.14034	2	0.16945	3	0.2442
45850	2	0.28146	4	0.17345	1	0.43816	2	0.13883	2	0.2585	4	0.14143	2	0.16915	3	0.24573
45900	3	0.27938	4	0.17139	1	0.4358	2	0.13862	2	0.25786	4	0.13869	2	0.17031	3	0.23806
45950	3	0.27846	4	0.1731	1	0.44145	2	0.13959	2	0.25963	4	0.14051	3	0.16973	3	0.24201
46000	3	0.27802	4	0.17085	1	0.43426	2	0.13621	2	0.25777	4	0.13838	3	0.17207	3	0.23925
46050	3	0.28026	4	0.17203	1	0.43729	3	0.14017	2	0.25749	4	0.14034	3	0.17182	3	0.24233
46100	3	0.2789	4	0.17186	1	0.43818	3	0.14045	2	0.25903	4	0.13921	3	0.1716	3	0.24126
46150	3	0.28137	4	0.17392	1	0.44145	3	0.14092	2	0.26395	4	0.13952	3	0.16781	3	0.2412
46200	3	0.27838	4	0.17257	1	0.44021	3	0.14058	2	0.25986	4	0.13955	3	0.17062	3	0.24206
46250	3	0.28563	4	0.17618	1	0.44459	3	0.14342	2	0.26348	4	0.14335	3	0.16932	3	0.23983
46300	3	0.27928	4	0.17445	1	0.44373	3	0.14024	2	0.26113	4	0.14109	3	0.17174	3	0.24138
46350	3	0.27859	4	0.17174	1	0.43983	3	0.14348	2	0.25776	4	0.13962	3	0.17141	3	0.23931
46400	3	0.27997	4	0.1733	1	0.44152	3	0.14133	2	0.26021	4	0.14024	3	0.17114	3	0.24253
46450	2	0.2783	4	0.17284	1	0.44207	3	0.14187	2	0.26022	4	0.13973	3	0.17234	3	0.23858
46500	2	0.28038	4	0.17238	1	0.43633	3	0.13876	2	0.25994	4	0.13886	3	0.17006	3	0.2427
46550	2	0.28095	4	0.17128	1	0.43401	3	0.14075	2	0.25628	4	0.14014	3	0.1722	3	0.24305
46600	2	0.27965	4	0.17316	1	0.43831	3	0.1388	2	0.26081	4	0.13959	3	0.17081	3	0.24122
46650	2	0.27646	4	0.17139	1	0.43766	3	0.1416	2	0.2601	4	0.13744	3	0.17064	3	0.24278
46700	2	0.27408	4	0.17189	1	0.43582	3	0.1413	2	0.25735	4	0.13973	3	0.16973	3	0.24212
46750	2	0.27402	4	0.17194	1	0.43987	3	0.14086	2	0.25713	4	0.13955	3	0.17056	3	0.24342
46800	2	0.27789	4	0.17429	1	0.44402	3	0.13966	2	0.2608	4	0.1414	3	0.17045	3	0.23971
46850	2	0.27588	4	0.17103	1	0.43682	3	0.13845	2	0.25404	4	0.14024	3	0.17185	3	0.24202
46900	2	0.27363	4	0.1716	1	0.43941	3	0.13786	2	0.25854	4	0.13914	3	0.17062	3	0.24313
46950	2	0.27469	3	0.1388	1	0.43242	3	0.1381	2	0.25633	3	0.23798	2	0.17048	3	0.23917
47000	2	0.27483	3	0.13986	1	0.43479	3	0.13684	2	0.26162	3	0.24234	2	0.17155	3	0.24412
47050	2	0.27544	2	0.17128	1	0.44309	3	0.1417	2	0.26255	3	0.24436	2	0.17188	3	0.23849
47100	2	0.28013	2	0.1704	1	0.43637	3	0.13928	2	0.25945	3	0.24001	2	0.16814	3	0.24745
47150	2	0.27379	2	0.16795	1	0.43342	3	0.14271	2	0.25622	3	0.23807	2	0.17015	3	0.24302
47200	2	0.27404	2	0.16884	1	0.4381	3	0.14099	2	0.25731	3	0.239	2	0.17359	3	0.24373
47250	3	0.19925	2	0.17034	1	0.43859	3	0.13803	1	0.25789	2	0.23924	2	0.17042	3	0.23954
47300	3	0.20107	2	0.17009	1	0.43897	3	0.14089	1	0.26015	2	0.2415	2	0.16918	3	0.24146
47350	3	0.19862	2	0.16879	1	0.43614	3	0.13911	1	0.25804	2	0.23969	3	0.17171	3	0.24236
47400	2	0.27416	2	0.16976	1	0.43863	3	0.14079	1	0.2587	2	0.24091	3	0.17155	3	0.24284
47450	3	0.19832	2	0.16884	1	0.43479	3	0.14034	1	0.25696	2	0.23863	3	0.17272	3	0.24134
47500	3	0.20342	2	0.17442	1	0.44541	3	0.14003	2	0.26503	3	0.247	3	0.16831	3	0.23917
47550	3	0.20112	2	0.17147	1	0.43987	3	0.1381	2	0.26191	3	0.24335	3	0.16981	3	0.2402
47600	2	0.27862	2	0.17193	1	0.43955	3	0.14034	1	0.26195	2	0.24421	3	0.17031	3	0.24503
47650	1	0.27291	2	0.17037	1	0.4406	3	0.13931	1	0.26305	1	0.24505	3	0.16904	3	0.24172
47700	1	0.27322	2	0.16795	1	0.43233	3	0.13976	1	0.25704	1	0.2393	3	0.17177	3	0.24545
47750	2	0.2816	2	0.17278	1	0.44131	3	0.14014	1	0.263	1	0.24414	3	0.1719	3	0.24352
47800	1	0.27561	2	0.17256	1	0.44623	3	0.14096	1	0.26152	1	0.24417	3	0.17485	3	0.24568
47850	1	0.27591	2	0.17075	0	0.44182	3	0.14058	1	0.26073	1	0.24238	3	0.16915	3	0.24034
47900	1	0.27369	2	0.16879	0	0.43921	3	0.1373	1	0.25554	1	0.23755	3	0.17078	3	0.23536
47950	2	0.27398	2	0.16912	1	0.43553	3	0.13876	1	0.25609	1	0.23876	3	0.17174	2	0.13841
48000	1	0.28003	2	0.17275	1	0.44451	3	0.13983	1	0.26116	1	0.24292	3	0.17158	2	0.14167
48050	1	0.27937	2	0.17245	1	0.44105	3	0.14058	1	0.26476	1	0.24665	3	0.16995	2	0.13938
48100	1	0.27693	2	0.17299	1	0.44813	3	0.13904	1	0.26253	1	0.24447	3	0.16965	2	0.14003
48150	2	0.27608	2	0.17045	1	0.43676	3	0.14235	1	0.26138	1	0.24373	3	0.16828	2	0.14103
48200	2	0.27486	2	0.16951	0	0.44143	3	0.1399	1	0.25402	1	0.2362	3	0.17248	2	0.13979
48250	1	0.27557	2	0.16976	0	0.4383	3	0.14238	1	0.25959	1	0.24091	3	0.17215	3	0.2446
48300	1	0.27629	2	0.17067	0	0.43991	3	0.13983	1	0.25873	1	0.24117	3	0.17316	3	0.2409
48350	1	0.27486	2	0.1699	0	0.43942	3	0.14065	1	0.25956	1	0.24106	3	0.1689	3	0.23627
48400	1	0.27309	2	0.16772	0	0.43544	3	0.14086	1	0.25586	1	0.23687	3	0.16981	3	0.24296
48450	1	0.27437	2	0.16901	0	0.43464	3	0.14089	1	0.25771	1	0.24009	3	0.17261	3	0.23965
48500	2	0.28131	2	0.17272	0	0.44255	3	0.13893	1	0.26279	1	0.24398	3	0.16937	3	0.23945
48550	2	0.27967	2	0.17147	0	0.43826	3	0.14089	1	0.261	2	0.24305	3	0.17053	3	0.23769
48600	2	0.28239	2	0.17488	0	0.44729	3	0.13962	1	0.26479	2	0.24702	3	0.1728	3	0.24431
48650	2	0.27728	3	0.14089	0	0.44209	3	0.1417	1	0.26143	2	0.24364	3	0.16831	3	0.2428
48700	2	0.27605	3	0.14136	0	0.43582	3	0.14068	1	0.26159	2	0.24398	3	0.16926	3	0.24475
48750	2	0.27837	3	0.13962	0	0.43619	3	0.14136	1	0.25647	2	0.2382	3	0.16859	3	0.24013
48800	1	0.27656	3	0.14034	0	0.43839	3	0.13821	1	0.26024	2	0.24185	3	0.17051	3	0.24063
48850	1	0.27303	3	0.13824	0	0.43335	3	0.13873	1	0.25581	2	0.23826	3	0.1719	3	0.24228
48900	1	0.27831	3	0.14228	0	0.44415	4	0.14167	1	0.26552	2	0.24707	3	0.17207	3	0.24158
48950	2	0.27485	3	0.13838	1	0.44222	4	0.13979	1	0.25843	3	0.14089	3	0.17086	3	0.23707
49000	2	0.2793	3	0.14123	1	0.44068	4	0.13638	1	0.25945	3	0.14194	3	0.1722	3	0.24013
49050	1	0.27544	3	0.13993	1	0.44147	4	0.14072	1	0.26049	3	0.13969	3	0.17297	3	0.23958
49100	2	0.27608	3	0.13945	1	0.44268	4	0.14106	1	0.26022	3	0.14041	3	0.16951	3	0.23578
49150	2	0.2803	3	0.14038	1	0.44442	4	0.13862	2	0.25999	4	0.14308	3	0.17004	3	0.24712
49200	1	0.2727	4	0.17127	1	0.4385	4	0.14034	2	0.25539	4	0.13966	3	0.16959	3	0.23985
49250	2	0.27783	4	0.17515	1	0.44466	4	0.14231	2	0.26343	3	0.24606	3	0.17286	3	0.24152
49300	2	0.2822	4	0.17481	1	0.44452	4	0.14369	2	0.25931	3	0.24181	3	0.17073	3	0.24282
49350	4	0.34125	3	0.13997	1	0.43698	4	0.14258	2	0.26098	3	0.24313	3	0.1684	3	0.24391
49400	2	0.28027	4	0.17302	1	0.43823	4	0.14024	2	0.26043	3	0.24228	3	0.16962	3	0.24536
49450	4	0.34294	4	0.17348	2	0.2864	4	0.13827	2	0.26061	3	0.24242	3	0.16934	3	0.24537
49500	4	0.34744	4	0.17344	2	0.28462	4	0.14007	2	0.26109	3	0.24321	3	0.17106	3	0.24235
49550	4	0.34971	4	0.17495	2	0.28714	4	0.14157	2	0.26264	3	0.24534	3	0.17062	3	0.24238
49600	4	0.34052	4	0.1695	2	0.28585	4	0.14136	2	0.25535	3	0.2375	3	0.17237	3	0.24019
49650	3	0.27697	4	0.1717	2	0.28536	4	0.13955	2	0.25916	3	0.24135	3	0.16973	3	0.24208
49700	3	0.27534	4	0.17052	2	0.2863	4	0.14201	2	0.25721	3	0.23914	3	0.1702	3	0.24545
49750	3	0.2833	4	0.17541	2	0.28608	4	0.13817	2	0.2633	3	0.24585	3	0.16895	3	0.2432
49800	3	0.28006	4	0.17427	2	0.28597	4	0.13907	2	0.26079	3	0.24302	3	0.1707	3	0.2407
49850	3	0.27915	4	0.17203	2	0.28728	4	0.13841	2	0.25898	3	0.2401	3	0.17144	3	0.24335
49900	3	0.27847	4	0.17085	2	0.28457	4	0.13873	2	0.25633	3	0.23805	3	0.17108	3	0.24096
49950	2	0.28152	4	0.17584	2	0.28706	4	0.13949	2	0.26297	3	0.24568	3	0.17062	3	0.23735
50000	2	0.28321	3	0.14211	2	0.28686	4	0.14017	2	0.26319	3	0.24491	3	0.17321	3	0.24028
50050	4	0.35207	3	0.14251	2	0.28643	4	0.14308	2	0.26562	3	0.24775	3	0.17075	3	0.24454
50100	4	0.35032	3	0.13966	2	0.28657	4	0.13973	2	0.25809	3	0.23973	3	0.17086	3	0.24633
50150	3	0.28136	3	0.14041	2	0.28768	4	0.14092	2	0.25989	4	0.1389	3	0.17062	3	0.248
50200	3	0.28017	3	0.14041	2	0.28356	4	0.13979	2	0.25862	3	0.24029	3	0.16998	3	0.24139
50250	3	0.28211	3	0.13949	2	0.28697	4	0.13973	2	0.25958	3	0.24038	3	0.16948	3	0.23924
50300	3	0.28051	3	0.13952	2	0.28564	4	0.14048	2	0.25727	3	0.23911	3	0.17242	3	0.2399
50350	2	0.28159	3	0.14	2	0.28581	4	0.13768	2	0.25893	3	0.24044	3	0.17207	3	0.24579
50400	3	0.2759	3	0.13817	2	0.28693	4	0.14452	2	0.25763	3	0.2393	3	0.17229	3	0.24533
50450	3	0.27513	3	0.13862	2	0.28396	4	0.13918	2	0.2573	3	0.24032	4	0.17266	3	0.24547
50500	3	0.27704	3	0.13876	2	0.28382	4	0.14113	1	0.25906	2	0.24136	4	0.17579	3	0.2392
50550	2	0.27911	3	0.14197	2	0.28499	4	0.13931	2	0.26334	3	0.24582	4	0.17539	3	0.2442
50600	2	0.27741	5	0.32314	1	0.43619	4	0.14072	2	0.25739	3	0.23833	4	0.17275	3	0.24673
50650	2	0.2791	4	0.17266	2	0.28587	4	0.14133	2	0.25662	3	0.23853	4	0.17355	3	0.2413
50700	3	0.19683	4	0.17191	2	0.28498	4	0.14089	2	0.25612	3	0.23935	4	0.17134	3	0.24872
50750	3	0.20224	4	0.17361	2	0.2862	4	0.13869	2	0.26257	3	0.24362	4	0.16955	3	0.23825
50800	2	0.27591	4	0.17132	2	0.28614	4	0.13814	2	0.25735	3	0.23897	4	0.16892	3	0.24134
50850	1	0.27255	4	0.17052	2	0.2847	4	0.13969	2	0.25518	3	0.23808	4	0.17172	3	0.24215
50900	2	0.27877	4	0.17466	2	0.2862	4	0.13831	2	0.26099	3	0.24368	4	0.17377	3	0.24212
50950	1	0.27392	4	0.1715	2	0.28676	4	0.14109	2	0.25802	3	0.23967	4	0.16952	3	0.23705
51000	1	0.27428	4	0.17195	1	0.4419	4	0.14282	2	0.26022	3	0.24118	4	0.17229	3	0.24385
51050	2	0.27899	4	0.17536	1	0.44326	4	0.1413	2	0.26301	3	0.2458	4	0.17151	3	0.24068
51100	2	0.27798	4	0.17462	1	0.44193	4	0.1413	2	0.2636	3	0.24507	3	0.17132	3	0.24505
51150	3	0.27689	4	0.17138	2	0.28574	4	0.14086	2	0.25591	3	0.23725	2	0.1702	3	0.24256
51200	3	0.28262	4	0.17402	2	0.28591	4	0.13827	2	0.25882	3	0.24162	2	0.17138	3	0.23922
51250	3	0.27795	4	0.17216	2	0.28535	3	0.1401	3	0.26344	3	0.24213	2	0.17261	3	0.23852
51300	4	0.34007	4	0.17133	2	0.28658	3	0.13918	3	0.26186	3	0.24039	2	0.16954	3	0.24417
51350	3	0.2818	4	0.17466	2	0.28698	3	0.13817	3	0.26622	3	0.24438	2	0.16998	3	0.23843
51400	3	0.28133	4	0.17322	2	0.28686	3	0.13928	2	0.25918	3	0.24121	2	0.17034	3	0.23814
51450	3	0.28063	4	0.17288	2	0.28574	4	0.1414	2	0.26055	3	0.24251	2	0.1718	3	0.23713
51500	3	0.28352	4	0.17353	2	0.28764	4	0.14181	2	0.26034	3	0.24166	3	0.1687	3	0.24297
51550	4	0.34757	4	0.17415	2	0.28744	4	0.14021	2	0.25957	3	0.242	3	0.17177	3	0.24454
51600	4	0.35066	4	0.17482	2	0.28666	3	0.14041	2	0.2602	3	0.24249	4	0.17354	3	0.243
51650	2	0.27461	4	0.17291	2	0.28574	3	0.14224	2	0.26105	3	0.24237	4	0.17538	3	0.24659
51700	2	0.28245	4	0.17501	2	0.28565	4	0.13938	2	0.26263	3	0.24436	4	0.1738	3	0.24402
51750	3	0.27972	4	0.17293	2	0.28535	4	0.1412	2	0.25892	3	0.23988	3	0.17352	3	0.23909
51800	3	0.28361	4	0.17507	2	0.28733	4	0.14147	2	0.26377	3	0.24434	3	0.17248	3	0.23964
51850	3	0.27577	4	0.17131	2	0.285	4	0.13979	1	0.37995	3	0.24162	3	0.17351	3	0.24107
51900	4	0.34777	4	0.17249	2	0.28545	4	0.14007	1	0.3821	3	0.24027	3	0.17369	3	0.24187
51950	4	0.34534	4	0.17198	2	0.28771	4	0.13918	1	0.37922	3	0.23829	4	0.17181	3	0.24047
52000	4	0.34276	4	0.17348	2	0.28717	4	0.13979	1	0.37907	3	0.2429	4	0.1737	3	0.24457
52050	4	0.34587	4	0.17221	2	0.28499	4	0.13782	1	0.38032	3	0.24003	4	0.17202	3	0.24217
52100	4	0.34544	4	0.17281	2	0.28542	4	0.13845	1	0.38088	3	0.24128	4	0.17406	3	0.23962
52150	4	0.34301	4	0.17032	2	0.28591	4	0.13935	1	0.37646	3	0.23762	4	0.17686	3	0.24
52200	4	0.34581	4	0.17179	2	0.28683	4	0.14007	1	0.38007	3	0.23974	4	0.17298	3	0.2418
52250	4	0.34615	4	0.17315	2	0.28737	4	0.13935	1	0.38147	3	0.24127	4	0.17111	3	0.24077
52300	3	0.278	4	0.17233	2	0.28731	4	0.14123	1	0.38274	3	0.24217	4	0.17582	3	0.24322
52350	2	0.28116	4	0.17375	2	0.28653	4	0.14058	1	0.38325	3	0.243	4	0.17279	3	0.24038
52400	5	0.48384	4	0.17503	2	0.28621	4	0.14275	1	0.38602	3	0.24257	3	0.17012	3	0.24107
52450	5	0.46994	4	0.16937	2	0.28347	4	0.13821	1	0.3724	3	0.23613	3	0.17171	2	0.13997
52500	5	0.48907	4	0.17675	2	0.28701	4	0.13983	1	0.38829	3	0.24683	3	0.17006	2	0.13962
52550	4	0.33916	4	0.17106	1	0.43438	4	0.13869	1	0.37472	3	0.23942	3	0.1682	2	0.14027
52600	4	0.34523	4	0.17396	1	0.43946	4	0.13803	1	0.38078	3	0.24249	3	0.1702	2	0.14096
52650	4	0.34701	4	0.17305	1	0.44001	4	0.14204	1	0.38097	4	0.14109	3	0.17119	2	0.13663
52700	4	0.34346	4	0.17376	1	0.43782	4	0.14034	1	0.3795	4	0.14177	3	0.17204	2	0.13955
52750	4	0.34004	4	0.17136	1	0.43536	4	0.14058	1	0.37637	4	0.13775	3	0.1704	2	0.1388
52800	4	0.34532	4	0.1723	1	0.43875	4	0.13883	1	0.3798	4	0.14014	3	0.17075	3	0.24237
52850	4	0.34029	4	0.17284	1	0.43412	4	0.13886	1	0.37482	4	0.1415	3	0.17174	3	0.24258
52900	4	0.34717	4	0.17509	1	0.44227	4	0.13803	1	0.38333	4	0.14157	3	0.16934	3	0.24186
52950	4	0.35131	4	0.17548	2	0.28816	4	0.1412	1	0.38616	4	0.14204	3	0.16918	3	0.24292
53000	4	0.34657	4	0.17266	2	0.28534	4	0.14048	1	0.38244	4	0.13886	3	0.17261	3	0.23714
53050	4	0.35081	4	0.17529	2	0.28558	4	0.13824	1	0.3858	3	0.24467	3	0.16915	3	0.24251
53100	4	0.34326	4	0.17345	2	0.28714	4	0.14147	1	0.37894	3	0.24264	3	0.17028	3	0.24319
53150	4	0.33928	4	0.16978	2	0.2866	4	0.13698	1	0.37366	3	0.23714	3	0.16934	3	0.24269
53200	4	0.34718	4	0.17275	2	0.2872	4	0.138	1	0.38072	3	0.23918	3	0.17231	3	0.24233
53250	4	0.34673	4	0.17357	2	0.28674	4	0.13831	1	0.3812	3	0.24228	3	0.16965	3	0.24387
53300	4	0.34114	4	0.17278	2	0.28835	4	0.14136	1	0.37704	3	0.24118	3	0.17092	3	0.23776
53350	4	0.34559	4	0.17084	2	0.28449	4	0.14109	1	0.37841	3	0.23782	3	0.16733	3	0.24491
53400	4	0.35003	4	0.17313	2	0.28727	4	0.13969	1	0.38297	3	0.23935	3	0.17001	3	0.2444
53450	4	0.34496	3	0.17192	2	0.2863	4	0.139	1	0.3792	4	0.13962	3	0.16781	3	0.24717
53500	4	0.34776	3	0.17429	2	0.287	4	0.14038	2	0.26231	4	0.14082	3	0.17048	3	0.24281
53550	4	0.34698	3	0.17137	2	0.28684	4	0.13737	2	0.25618	4	0.13976	3	0.16879	3	0.24156
53600	4	0.34254	3	0.17376	2	0.28713	4	0.13979	2	0.26044	4	0.14072	3	0.17023	3	0.23914
53650	4	0.35122	3	0.17396	2	0.28741	4	0.13931	2	0.25958	4	0.1417	3	0.17196	3	0.24142
53700	4	0.34649	3	0.17367	2	0.28694	4	0.13942	2	0.26292	4	0.13945	3	0.17009	3	0.2361
53750	4	0.35528	3	0.17339	2	0.2867	4	0.13973	2	0.25913	4	0.1413	3	0.17106	3	0.23905
53800	4	0.34941	3	0.17318	2	0.28667	4	0.14164	2	0.25793	4	0.14181	3	0.17045	3	0.24407
53850	4	0.34431	3	0.17301	2	0.28666	3	0.14024	1	0.26059	3	0.14	3	0.1719	3	0.2464
53900	4	0.3399	3	0.17076	2	0.28578	3	0.14089	1	0.25665	3	0.13855	3	0.1702	3	0.24239
53950	4	0.34466	3	0.17257	2	0.28595	3	0.13779	1	0.25944	3	0.13966	3	0.17001	3	0.23596
54000	4	0.34668	3	0.17403	2	0.28641	3	0.13952	1	0.25947	3	0.14143	3	0.16898	3	0.24014
54050	4	0.34047	3	0.17287	2	0.28489	3	0.13841	1	0.25969	3	0.13986	1	0.17149	3	0.24033
54100	4	0.34188	3	0.17258	2	0.28528	3	0.14065	1	0.25768	3	0.14079	1	0.17335	3	0.23613
54150	4	0.33991	3	0.17238	2	0.28495	3	0.1417	1	0.2596	3	0.13924	1	0.17256	3	0.2389
54200	4	0.34579	3	0.17186	2	0.28673	3	0.13983	1	0.25955	3	0.13907	1	0.17326	3	0.24119
54250	4	0.34542	3	0.17266	2	0.28422	3	0.14048	1	0.25975	3	0.13931	1	0.17337	3	0.2429
54300	4	0.35133	3	0.17623	2	0.28466	3	0.14275	1	0.264	2	0.24653	1	0.17278	3	0.24424
54350	4	0.34617	3	0.1727	2	0.28561	3	0.13834	1	0.25971	2	0.24217	1	0.17128	3	0.24317
54400	4	0.34137	2	0.14133	2	0.2857	3	0.13928	1	0.25952	2	0.24137	2	0.16851	3	0.23925
54450	4	0.33901	2	0.13955	2	0.28636	3	0.13983	1	0.25877	2	0.2402	2	0.17174	3	0.23809
54500	4	0.34256	2	0.14194	2	0.28687	3	0.14058	2	0.26121	3	0.24333	2	0.16845	3	0.24488
54550	4	0.34051	2	0.14369	2	0.28572	3	0.13821	2	0.26439	3	0.24726	2	0.16786	3	0.23924
54600	4	0.35344	2	0.14089	2	0.28621	3	0.13983	2	0.26172	3	0.24409	2	0.17056	3	0.23767
54650	4	0.34276	2	0.13928	2	0.28594	3	0.14258	1	0.37757	3	0.24022	2	0.17095	3	0.24004
54700	4	0.34502	2	0.13838	2	0.28771	3	0.1413	1	0.37823	3	0.23778	2	0.1704	3	0.24359
54750	4	0.34786	2	0.13817	2	0.28604	3	0.14164	1	0.38108	3	0.23834	2	0.16859	3	0.24648
54800	4	0.34257	1	0.23831	2	0.28651	3	0.13821	1	0.37639	3	0.2369	2	0.1718	3	0.23809
54850	4	0.34268	1	0.23897	2	0.28469	3	0.14435	1	0.37836	3	0.24219	2	0.16764	3	0.23982
54900	4	0.34882	1	0.24288	2	0.28464	3	0.14024	1	0.38376	3	0.2424	2	0.16937	3	0.23787
54950	4	0.34151	1	0.23863	2	0.28631	3	0.13834	1	0.37641	3	0.24009	2	0.16851	3	0.23906
55000	4	0.34216	0	0.32316	2	0.2843	3	0.13862	1	0.3771	3	0.24017	2	0.17125	3	0.24275
55050	4	0.34992	0	0.33275	2	0.28666	3	0.13935	1	0.38486	3	0.24277	2	0.17155	3	0.24471
55100	4	0.33929	0	0.32046	2	0.28522	3	0.14228	1	0.37425	3	0.23879	2	0.17023	3	0.24285
55150	4	0.34513	0	0.32729	1	0.43941	3	0.14075	1	0.38071	3	0.2418	2	0.1707	3	0.23844
55200	4	0.34465	0	0.32632	1	0.43749	3	0.13768	1	0.37889	3	0.23911	2	0.16865	3	0.24067
55250	4	0.34747	0	0.32903	1	0.43937	4	0.14109	1	0.37992	3	0.23748	2	0.1713	3	0.24357
55300	2	0.27394	0	0.31857	1	0.43393	3	0.13768	1	0.37296	4	0.13522	2	0.16923	3	0.24068
55350	2	0.27786	0	0.32048	1	0.43283	3	0.13852	0	0.37319	3	0.13761	2	0.17188	3	0.24052
55400	2	0.27852	0	0.32313	2	0.28753	3	0.14007	0	0.37724	3	0.13779	2	0.16909	3	0.24518
55450	2	0.27983	0	0.33228	2	0.28567	3	0.14288	0	0.38331	3	0.14109	2	0.1699	3	0.24104
55500	2	0.28016	0	0.32554	2	0.2859	4	0.14153	0	0.38051	2	0.24523	2	0.17201	3	0.2437
55550	2	0.27906	0	0.32974	2	0.28714	4	0.13751	0	0.37936	2	0.23567	2	0.17086	3	0.23702
55600	2	0.2844	0	0.32842	1	0.43996	4	0.13866	0	0.38142	2	0.24333	2	0.17086	3	0.2399
55650	2	0.27874	0	0.32494	1	0.43732	4	0.13838	0	0.37899	2	0.24215	2	0.16959	3	0.24207
55700	4	0.34443	0	0.32557	1	0.4394	4	0.14034	0	0.37906	2	0.24116	2	0.16693	3	0.23735
55750	3	0.28163	0	0.32912	2	0.28754	4	0.13824	0	0.38224	2	0.24223	2	0.17023	3	0.24359
55800	3	0.28207	0	0.33861	2	0.28765	3	0.13649	0	0.39025	2	0.2438	2	0.1725	3	0.24144
55850	2	0.27847	0	0.32614	1	0.43903	4	0.14109	0	0.37903	2	0.23953	2	0.16976	3	0.24696
55900	4	0.34183	0	0.32429	1	0.43672	4	0.14058	0	0.37847	2	0.24401	2	0.17059	2	0.14318
55950	4	0.34652	1	0.24096	2	0.28555	4	0.13677	0	0.38106	2	0.24186	2	0.17062	2	0.14133
56000	4	0.34554	1	0.24271	2	0.28782	4	0.13959	1	0.26163	2	0.24373	2	0.1697	2	0.13907
56050	4	0.35091	1	0.24508	2	0.28688	4	0.14308	1	0.25961	2	0.24311	2	0.1682	2	0.14089
56100	4	0.34419	1	0.24068	2	0.28503	4	0.14024	1	0.25644	2	0.23824	2	0.1716	2	0.13966
56150	4	0.34377	1	0.24013	2	0.28676	4	0.13893	1	0.26057	2	0.24207	2	0.17237	2	0.13803
56200	4	0.34747	1	0.24299	2	0.28585	4	0.14197	1	0.25718	2	0.23906	2	0.17056	2	0.13973
56250	3	0.20045	1	0.24157	2	0.28778	4	0.13918	1	0.26027	2	0.2423	3	0.1719	2	0.13747
56300	3	0.20075	1	0.23993	2	0.28621	4	0.1389	1	0.2601	2	0.24193	3	0.1687	2	0.14031
56350	4	0.34658	1	0.2426	2	0.28706	4	0.13838	1	0.26121	3	0.14096	3	0.17026	2	0.14031
56400	3	0.27922	0	0.32165	2	0.28633	4	0.13775	2	0.25822	4	0.1381	3	0.17084	2	0.14208
56450	3	0.27982	0	0.32719	2	0.28496	4	0.14072	2	0.26086	4	0.13962	3	0.16937	2	0.14051
56500	3	0.27622	0	0.33154	2	0.28551	4	0.14068	2	0.26197	4	0.13859	2	0.17004	2	0.1412
56550	3	0.27861	0	0.32431	2	0.28598	4	0.13945	2	0.25706	4	0.13914	2	0.17108	2	0.1401
56600	3	0.28245	0	0.33923	2	0.28805	4	0.14068	2	0.26422	3	0.24587	2	0.17259	2	0.14038
56650	2	0.275	0	0.33288	2	0.28503	4	0.13855	2	0.26058	3	0.24255	2	0.1699	2	0.13824
56700	4	0.35558	0	0.3378	2	0.28733	4	0.14041	2	0.26039	3	0.2411	2	0.17012	2	0.14072
56750	2	0.28392	0	0.3278	2	0.28814	4	0.13959	2	0.26053	3	0.2428	2	0.17122	2	0.1414
56800	3	0.27845	0	0.32592	2	0.28681	4	0.14191	2	0.2596	3	0.24088	2	0.16865	2	0.13529
56850	4	0.34501	0	0.32759	2	0.28438	4	0.13921	2	0.26062	3	0.24217	2	0.17242	2	0.1401
56900	3	0.19619	0	0.32319	2	0.28584	4	0.14218	2	0.25398	4	0.1389	2	0.1694	2	0.13886
56950	3	0.20087	0	0.32785	2	0.28701	4	0.14041	2	0.25878	4	0.13866	2	0.17201	2	0.13897
57000	3	0.19925	0	0.32192	2	0.28658	3	0.14235	2	0.25914	4	0.13855	2	0.17269	2	0.14204
57050	3	0.19922	0	0.3307	2	0.28792	3	0.14308	2	0.25621	4	0.1412	2	0.17028	2	0.14048
57100	3	0.1999	0	0.32345	2	0.28457	3	0.1414	2	0.25635	4	0.13848	2	0.17223	2	0.14007
57150	3	0.2008	0	0.32424	2	0.28427	3	0.14014	2	0.26043	4	0.1381	2	0.17128	2	0.14058
57200	3	0.19855	0	0.32562	2	0.28737	3	0.13873	2	0.25712	4	0.14031	2	0.17297	2	0.14031
57250	3	0.2	0	0.32551	0	0.43722	4	0.14045	2	0.2593	4	0.14024	2	0.16909	2	0.14106
57300	3	0.20075	0	0.33486	0	0.44449	3	0.14177	2	0.26144	3	0.2443	2	0.17037	2	0.13969
57350	3	0.19942	1	0.24019	0	0.43755	3	0.13969	2	0.25871	3	0.24031	2	0.17084	2	0.1412
57400	3	0.19842	1	0.24306	0	0.44084	3	0.14048	2	0.26029	3	0.24336	2	0.17106	2	0.13705
57450	4	0.34415	1	0.24094	0	0.43975	3	0.14027	2	0.26196	3	0.24371	2	0.16826	2	0.13924
57500	4	0.34387	1	0.24132	0	0.44047	3	0.13907	2	0.2641	3	0.24623	2	0.17075	1	0.23969
57550	4	0.34041	1	0.23787	0	0.43608	3	0.13993	2	0.26039	3	0.24213	2	0.17042	2	0.14034
57600	5	0.4755	1	0.23866	0	0.43521	3	0.14123	2	0.25847	4	0.13907	2	0.1716	2	0.13924
57650	5	0.47652	1	0.23728	0	0.43482	3	0.14041	2	0.26038	4	0.13765	3	0.17078	2	0.14136
57700	5	0.48141	1	0.24609	0	0.44414	3	0.13723	2	0.25728	4	0.14123	3	0.16959	2	0.14034
57750	5	0.4825	1	0.24297	0	0.4441	3	0.14113	2	0.26211	4	0.138	3	0.17075	2	0.14007
57800	5	0.48567	1	0.24664	0	0.44611	3	0.14214	2	0.26087	4	0.14143	3	0.16854	2	0.13638
57850	5	0.48255	1	0.24421	0	0.44228	3	0.1415	2	0.26109	4	0.14089	3	0.17149	2	0.14021
57900	5	0.48206	1	0.24187	0	0.43959	3	0.13631	1	0.26199	3	0.14014	3	0.1724	2	0.14184
57950	5	0.47745	1	0.23943	0	0.4377	3	0.13966	1	0.26006	3	0.14	3	0.17283	2	0.14109
58000	5	0.47678	1	0.24147	0	0.43938	3	0.14024	1	0.25686	2	0.23861	3	0.16809	2	0.14014
58050	5	0.4771	1	0.23938	0	0.43592	3	0.13924	1	0.25968	3	0.13866	3	0.17089	2	0.13942
58100	5	0.47704	1	0.2403	0	0.43754	3	0.14143	1	0.25841	3	0.13952	3	0.16909	2	0.14072
58150	5	0.48403	1	0.24436	0	0.44241	3	0.13966	1	0.26185	3	0.1413	3	0.16979	2	0.14214
58200	5	0.47676	1	0.24143	0	0.43923	3	0.14021	1	0.25707	3	0.14041	3	0.17318	2	0.14038
58250	4	0.34272	1	0.24122	0	0.43942	3	0.14174	1	0.26386	3	0.14065	3	0.1722	2	0.14024
58300	4	0.34001	1	0.23871	0	0.43691	3	0.14197	1	0.26013	3	0.13914	3	0.1684	2	0.14133
58350	4	0.34559	1	0.24203	0	0.44052	3	0.13969	1	0.26299	3	0.13969	3	0.17017	2	0.1415
58400	4	0.3448	1	0.2417	0	0.44008	3	0.14228	1	0.2609	3	0.14038	3	0.17084	2	0.14014
58450	4	0.35463	1	0.24708	0	0.44636	3	0.14072	1	0.26322	3	0.14285	3	0.17136	2	0.14106
58500	4	0.3485	1	0.24313	0	0.44125	4	0.13754	1	0.2604	3	0.1413	3	0.17253	2	0.13993
58550	5	0.48555	1	0.24434	0	0.44262	4	0.14041	1	0.2627	3	0.14342	3	0.171	2	0.14055
58600	5	0.47756	1	0.24062	0	0.43847	3	0.13841	1	0.25881	3	0.13918	3	0.17275	2	0.13997
58650	4	0.34201	1	0.23997	0	0.43633	3	0.14123	1	0.26085	3	0.14017	3	0.17226	2	0.14062
58700	4	0.34918	1	0.24399	0	0.44056	3	0.13638	1	0.25838	3	0.14258	3	0.17122	2	0.139
58750	4	0.33794	1	0.2388	0	0.43522	3	0.1416	1	0.26087	3	0.14092	3	0.17023	2	0.13945
58800	4	0.33867	1	0.23666	0	0.43619	3	0.14147	1	0.26069	3	0.13642	3	0.17042	2	0.14007
58850	4	0.34431	1	0.24045	0	0.43767	3	0.14079	1	0.25957	3	0.13959	3	0.16995	2	0.13959
58900	4	0.34557	1	0.24268	0	0.43903	4	0.13935	1	0.26174	3	0.14147	3	0.16951	2	0.1401
58950	4	0.34959	1	0.24319	0	0.44208	4	0.14079	1	0.25961	3	0.14041	3	0.16934	2	0.13993
59000	4	0.35195	1	0.24555	1	0.29622	4	0.14143	1	0.26062	3	0.14194	3	0.17012	2	0.13911
59050	4	0.3429	1	0.24032	1	0.29846	4	0.13914	1	0.259	3	0.14116	3	0.16984	2	0.14031
59100	5	0.47964	1	0.24136	1	0.29638	3	0.14055	1	0.26082	3	0.13907	3	0.17356	2	0.13855
59150	4	0.34758	1	0.24155	1	0.29548	4	0.13817	1	0.25993	3	0.13876	3	0.16837	2	0.13866
59200	4	0.34453	1	0.24055	1	0.29478	4	0.13821	1	0.25645	3	0.13893	3	0.1713	2	0.14133
59250	4	0.34208	1	0.23934	1	0.29327	4	0.139	1	0.26034	3	0.13855	3	0.17125	2	0.14041
59300	4	0.34722	1	0.24249	1	0.29679	4	0.13969	2	0.26327	3	0.14075	3	0.17095	2	0.13918
59350	4	0.34714	1	0.24399	1	0.29669	4	0.14194	2	0.26689	3	0.14258	3	0.17212	2	0.13969
59400	4	0.34909	0	0.3308	1	0.29816	3	0.13883	2	0.26842	3	0.14031	3	0.17092	2	0.13786
59450	3	0.28016	0	0.33064	1	0.29426	3	0.14034	2	0.26504	3	0.14058	3	0.16979	2	0.13935
59500	2	0.28191	0	0.33193	1	0.29502	3	0.13942	2	0.26298	3	0.14224	3	0.17009	2	0.14191
59550	2	0.27601	0	0.32817	1	0.29267	3	0.14017	2	0.26148	3	0.13824	3	0.17343	2	0.13918
59600	2	0.27346	0	0.32616	1	0.29494	3	0.13955	2	0.25849	3	0.13723	3	0.17045	2	0.13938
59650	2	0.27798	0	0.33041	1	0.29381	3	0.13688	2	0.26502	3	0.13935	3	0.16884	2	0.14065
59700	2	0.27598	0	0.33012	1	0.29471	3	0.13979	2	0.25981	3	0.13845	3	0.17048	2	0.13845
59750	2	0.28173	0	0.3285	1	0.29762	3	0.14096	2	0.25834	3	0.14109	3	0.1692	2	0.14103
59800	2	0.2804	0	0.32514	1	0.29583	3	0.1399	2	0.26754	3	0.13866	3	0.1702	2	0.13914
59850	2	0.28067	0	0.33009	1	0.29569	3	0.14003	2	0.25867	3	0.1413	3	0.17169	2	0.13803
59900	2	0.27856	0	0.32659	1	0.29537	3	0.14079	1	0.26444	3	0.13893	3	0.16981	2	0.13869
59950	4	0.34157	0	0.32433	1	0.2966	3	0.14385	1	0.26308	3	0.14106	3	0.1689	2	0.1388
60000	1	0.39298	0	0.3256	1	0.29618	2	0.13869	1	0.26063	2	0.14011	2	0.16803	2	0.14123
